# Supplementary material for: Can clinical case discussions foster clinical reasoning skills in undergraduate medical education? A randomised controlled trial
Source: PubMed Central journal article supplement — BMJ Open. 2019 Sep 6;9(9):e025973. doi: 10.1136/bmjopen-2018-025973 (PMC6731854; doi:10.1136/bmjopen-2018-025973), 2019-09-06
Supplement: bmjopen-2018-025973.draft_revisions.pdf [file bmjopen-2018-025973.draft_revisions.pdf]

# BMJ Open

BMJ Open is committed to open peer review. As part of this commitment we make the peer review history of every article we publish publicly available.

When an article is published we post the peer reviewers' comments and the authors' responses online. We also post the versions of the paper that were used during peer review. These are the versions that the peer review comments apply to.

The versions of the paper that follow are the versions that were submitted during the peer review process. They are not the versions of record or the final published versions. They should not be cited or distributed as the published version of this manuscript.

BMJ Open is an open access journal and the full, final, typeset and author-corrected version of record of the manuscript is available on our site with no access controls, subscription charges or pay-per-view fees (<http://bmjopen.bmj.com>).

If you have any questions on BMJ Open's open peer review process please email [info.bmjopen@bmj.com](mailto:info.bmjopen@bmj.com)

# BMJ Open

## Can Clinical Case Discussions foster clinical reasoning skills in undergraduate medical education? A randomised controlled trial

|                               |                                                                                                                                                                                                                                                                                                                                                                                                                                                                                                                                                                                                                                                                                                                                                                        |
|-------------------------------|------------------------------------------------------------------------------------------------------------------------------------------------------------------------------------------------------------------------------------------------------------------------------------------------------------------------------------------------------------------------------------------------------------------------------------------------------------------------------------------------------------------------------------------------------------------------------------------------------------------------------------------------------------------------------------------------------------------------------------------------------------------------|
| Journal:                      | <i>BMJ Open</i>                                                                                                                                                                                                                                                                                                                                                                                                                                                                                                                                                                                                                                                                                                                                                        |
| Manuscript ID                 | bmjopen-2018-025973                                                                                                                                                                                                                                                                                                                                                                                                                                                                                                                                                                                                                                                                                                                                                    |
| Article Type:                 | Research                                                                                                                                                                                                                                                                                                                                                                                                                                                                                                                                                                                                                                                                                                                                                               |
| Date Submitted by the Author: | 14-Aug-2018                                                                                                                                                                                                                                                                                                                                                                                                                                                                                                                                                                                                                                                                                                                                                            |
| Complete List of Authors:     | Weidenbusch, Marc; University Hospital of LMU Munich, Institute for Medical Education; University Hospital of LMU Munich, Department of Internal Medicine IV<br>Lenzer, Benedikt; University Hospital of LMU Munich, Institute for Medical Education<br>Sailer, Maximilian; LMU Munich, Department of Psychology<br>Strobel, Christian; University Hospital of LMU Munich, Institute for Medical Education<br>Kunisch, Raphael; University Hospital of LMU Munich, Institute for Medical Education<br>Kiesewetter, Jan; University Hospital of LMU Munich, Institute for Medical Education<br>Fischer, Martin; University Hospital of LMU Munich, Institute for Medical Education<br>Zottmann, Jan; University Hospital of LMU Munich, Institute for Medical Education |
| Keywords:                     | Undergraduate medical education, Case-based learning, Clinical reasoning, Social interaction, Medical decision making                                                                                                                                                                                                                                                                                                                                                                                                                                                                                                                                                                                                                                                  |
|                               |                                                                                                                                                                                                                                                                                                                                                                                                                                                                                                                                                                                                                                                                                                                                                                        |

SCHOLARONE™  
Manuscripts

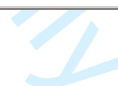

## RESEARCH PAPER

**Can Clinical Case Discussions foster clinical reasoning skills in  
undergraduate medical education? A randomised controlled trial**

*Dr. med. Marc Weidenbusch<sup>1,2\*</sup>, Benedikt Lenzer<sup>2\*</sup>, Prof. Dr. phil. Maximilian Sailer<sup>3</sup>,*

*Dr. phil. Christian Strobel<sup>2</sup>, Raphael Kunisch<sup>2</sup>, Dr. phil. Jan Kiesewetter<sup>2</sup>, Prof. Dr.*

*med. Martin R. Fischer<sup>2</sup> & Dr. phil. Jan M. Zottmann<sup>2</sup>*

<sup>1</sup>Nephrologisches Zentrum, Medizinische Klinik und Poliklinik IV, Klinikum der  
Universität München, LMU München

<sup>2</sup>Institut für Didaktik und Ausbildungsforschung in der Medizin, Klinikum der  
Universität München, LMU München

<sup>3</sup>Department Psychologie, Ludwig-Maximilians-Universität München

\*equal contribution

*Corresponding author:*

Dr. phil. Jan M. Zottmann

Institut für Didaktik und Ausbildungsforschung in der Medizin

Klinikum der Universität München, LMU München

Pettenkoferstr. 8a, D-80336 Munich, Germany

Tel: +49 89 4400 57203

Fax: +49 89 4400 57202

E-Mail: [jan.zottmann@med.uni-muenchen.de](mailto:jan.zottmann@med.uni-muenchen.de)

**Word count:** 3070 words

**Keywords:** undergraduate medical education, case-based learning, clinical reasoning,  
social interaction, medical decision making

## Abstract

**Objective:** Fostering clinical reasoning is a mainstay of medical education. Based on the Clinicopathological Conferences, we propose a case-based peer teaching approach called Clinical Case Discussions (CCDs) to promote the respective skills in medical students. This study compares the effectiveness of different CCD formats with varying degrees of social interaction in fostering clinical reasoning.

**Design, Setting, Participants:** A single-center randomised controlled trial with a parallel design was conducted at a German university. The 106 study participants were stratified (age, gender, year of study, prior CCD participation, performance in a pre-test) and tested regarding their clinical reasoning skills right after CCD participation and two weeks later.

**Intervention:** Participants worked either within a live discussion group (Live-CCD), a group watching recordings of the live discussions (Video-CCD), or a group working with printed cases (Paper-Cases). The presentation of case information followed an admission-, discussion-, summary-sequence.

**Primary and secondary outcome measures:** Clinical reasoning skills were measured with a knowledge application test addressing the students' conceptual, strategic, and conditional knowledge. Additionally, subjective learning outcomes were assessed.

**Results:** With respect to learning outcomes, the Live-CCD group displayed the best results, followed by Video-CCD and Paper-Cases. No difference was found between Live-CCD and Video-CCD groups in the delayed post-test; both outperformed the Paper-Cases group. Regarding subjective learning outcomes, the Live-CCD received significantly better ratings than the other formats.

1  
2  
3  
4 **Conclusions:** This study demonstrates that the CCD approach is an effective and  
5 sustainable clinical reasoning teaching resource for medical students. Subjective  
6 learning outcomes underline the importance of learner (inter-)activity in the acquisition  
7 of clinical reasoning skills in the context of case-based learning. Higher efficacy of  
8 more interactive formats can be attributed to positive effects of collaborative learning.  
9  
10 Future research should investigate how the Live-CCD format can further be improved  
11 and how video-based CCDs can be enhanced through instructional support.  
12  
13  
14  
15  
16  
17  
18  
19  
20

## 21 **Article summary**

### 22 **Strengths and limitations of this study:**

- 23 • First empirical study on the implementation of Clinical Case Discussions in  
24 undergraduate medical education.
- 25 • Comparison of Clinical Case Discussions with differing grades of social  
26 interaction to determine their effectiveness on medical students' acquisition of  
27 clinical reasoning skills by between-group analyses.
- 28 • Implementation of multidimensional and multilayered test instruments in a pre-,  
29 post- and delayed post-test design to measure clinical reasoning skills by a  
30 knowledge application test and self-assessment.
- 31 • The knowledge application test utilized in this study did not allow for a more in-  
32 depth analysis of clinical reasoning skills (i.e., a distinction of conceptual,  
33 strategic, and conditional knowledge).
- 34 • Despite the large sample size and strict randomisation the ubiquitous selection  
35 bias in medical education when predominantly motivated students register  
36 voluntarily for trials could have influenced the results of this study.
- 37  
38  
39  
40  
41  
42  
43  
44  
45  
46  
47  
48  
49  
50  
51  
52  
53  
54  
55  
56  
57  
58  
59  
60

## Introduction

Curriculum developers face the challenge of implementing competence-oriented frameworks such as CanMEDS (Canada), the NKLM (Germany) or PROFILES (Switzerland), including the need to train clinical reasoning skills as a medical doctor's key competence.[1-3] As such, clinical reasoning skills are crucial not only for appropriate medical decision making, but also to avoid diagnostic errors and the associated harm for both patients and healthcare systems.[4]

Case-based learning has been proposed to foster clinical reasoning skills[5] and is well accepted amongst students.[6] Case-based learning found an early representation in Clinicopathological Conferences (CPC, first introduced by Cannon in 1900[7]) which are practiced until today. The Clinicopathological Conferences conducted at the Massachusetts General Hospital are published on a regular basis known as the *Case Records* series of the New England Journal of Medicine. In those CPCs the “medical mystery”[8] presented by the case under discussion calls readers to think about the possible diagnosis themselves, before it is finally disclosed at the last part of the CPC. Despite the absence of definitive evidence for efficacy as a teaching method, CPCs have widely been used in medical education since the early 20th century to foster clinical reasoning.[9-11] While these CPC-Case Records reaches lots of medical readers around the world, it has been criticised as being anachronistic with a diagnosing “star (i.e. the discussant), performing, acutely aware of being the center of attention”.[12]

Case-based learning formats are embedded in a context, which is known to promote learning better than providing facts in an abstract, non-contextual form.[13] Merseth proposed three essential elements for cases: “They are real, they rely on careful research and study; and they provide data for consideration and discussion by users”.[14]

1  
2  
3  
4 Compared to case vignettes, elaborated and authentic cases provide increased diagnostic  
5 challenge, comprising an additional value for medical training.[15]  
6  
7

8 However, due to their setup, CPCs are often a passive learning situation for participants,  
9  
10 as they listen to the discussant laying out his or her clinical reasoning on the case under  
11 discussion. According to the ICAP framework by Chi et al.,[16] teaching formats  
12 increase their efficacy from passive < active < constructive < interactive learning  
13 environments. Based on the ICAP model, any intervention that would lead to more  
14 effective cognitive (i.e. constructive or interactive) learner activities should improve the  
15 learning outcomes of that format. Especially when students interactively engage in  
16 discussions among each other, learning is enhanced. Accordingly, case-based learning  
17 has been found to be particularly beneficial in collaborative settings.[17] However,  
18 another important aspect to consider in collaborative learning environments is the  
19 potential for social loafing, i.e. mostly passive participation of students.[18] To foster  
20 optimal learning effects, students should thus be encouraged to be interactively  
21 engaged. One prerequisite to achieve self-guided learning in groups is a low threshold  
22 for students to come forward with their questions and participate in ensuing  
23 discussions.[19] To this end, peer teaching has been established as an effective tool to  
24 stimulate discussions.[20] To make sure peer tutors are not overwhelmed in moderating  
25 these discussions, the presence of an experienced clinician appears to be warranted[21]  
26 in addition to a specific training of the tutors.  
27  
28  
29  
30  
31  
32  
33  
34  
35  
36  
37  
38  
39  
40  
41  
42  
43  
44  
45

46 Taken together, while traditional CPCs encompass some important dimensions of  
47 effective case-based learning environments, they are not systematically aiming at  
48 constructive or interactive learner activities that are known features of effective teaching  
49 formats.[16,22] Therefore, we introduced Clinical Case Discussions (CCD) in  
50  
51  
52  
53  
54  
55  
56  
57  
58  
59  
60

1  
2  
3  
4 undergraduate medical education to account for these features. We still use the Case  
5  
6 Records of the Massachusetts General Hospital,[9] as these cases exemplify realistic  
7  
8 patient encounters and fulfill the criteria for an interactive collaborative learning process  
9  
10 as explained above. In the CCD approach, cases are presented only until the hospital  
11  
12 admission of the patient, followed by an interactive discussion about possible diagnoses  
13  
14 and diagnostic strategies. After all test results have been discussed, the actual diagnosis  
15  
16 is disclosed and the pitfalls and take-home messages of the case are summarised.

17  
18 To investigate the effectiveness of the CCD approach in undergraduate medical  
19  
20 education, we designed an intervention trial and assessed clinical reasoning skills in  
21  
22 medical students before and after *participating in live CCDs or being exposed* to video  
23  
24 recordings of live CCDs. We compared these formats and its effects on clinical  
25  
26 reasoning with the more traditional approach of working through written cases. When  
27  
28 carrying out this randomised trial, we hypothesised that participation in live CCD  
29  
30 sessions would lead to a higher increase of clinical reasoning skills than simply reading  
31  
32 the cases. To better understand possible effects of the CCD learning environment with  
33  
34 its social components on learning outcomes, participation in live CCDs as outlined  
35  
36 above was additionally compared to the effects of watching videos of CCDs online.  
37  
38 This comparison also seemed relevant from an economic point of view as video-  
39  
40 streaming of lectures and seminars are prevalent at many institutions in higher  
41  
42 education allowing for flexible and scalable access to learning materials.[23]  
43  
44  
45  
46  
47  
48

## 49 **Methods**

### 50 **Study participants / Ethics**

51  
52  
53  
54  
55  
56  
57  
58  
59  
60



1  
2  
3  
4 Initially, we recruited 106 volunteer medical students of XXXXX Medical Faculty.  
5  
6 Participants were stratified by age, gender, year of study, prior CCD participation and  
7  
8 performance in a knowledge application pre-test at T<sub>0</sub>. They were then randomly  
9  
10 assigned to one of the experimental groups and a total of 90 participants eventually  
11  
12 completed the study, 31 of them were male and 59 female. They were 20 to 41 years old  
13  
14 ( $M = 23$ ;  $SD = 2.97$ ) and in their first to eighth clinical semester ( $M = 3.5$ ;  $SD = 1.78$ ).  
15  
16 The protocol for the trial was approved by the Institutional Ethics Review Board.  
17  
18 Written informed consent was obtained from all study participants and they received a  
19  
20 financial reimbursement of 50 Euros upon completion of the trial.  
21  
22  
23  
24

### 25 **Patient and public involvement**

26  
27 No patients or public were involved in this research.  
28  
29  
30  
31

### 32 **Clinical Case Discussions**

33  
34 In all experimental groups the intervention was based on the same three, independent  
35  
36 internal medicine cases[24-26] which were worked through in an iterative approach in  
37  
38 different formats: (a) peer-moderated live case discussions in an interactive setting  
39  
40 (Live-CCD,  $n = 30$ ), (b) a single-learner format utilizing an interactive multimedia  
41  
42 platform displaying video recordings of the live case discussions (Video-CCD,  $n = 27$ ),  
43  
44 and (c) a single-learner format in which the students worked with the original paper  
45  
46 cases of the NEJM (Paper-Cases,  $n = 33$ ). The cases were prepared in a way that  
47  
48 participants in each format were exposed to the same case information.  
49  
50

51  
52 In all three groups cases were presented in a specified structured manner similar to the  
53  
54 original Clinicopathological Conferences (see Figure 1). In each format the students  
55  
56  
57  
58  
59  
60

1  
2  
3  
4 (“discussants”) had to fill out a form after the admission in which the case had to be  
5 summarised and a list of clinical problems and working diagnoses had to be provided.  
6  
7 Subsequently, between discussion and summary a second case-summary had to be  
8 completed in which the final diagnostic test and the most likely diagnosis had to be  
9 proposed.  
10  
11  
12  
13

14 \*\*\*\*\*

15  
16 Insert Figure 1 about here

17 \*\*\*\*\*  
18

19  
20 In the Live-CCD group, the case presentation was prepared beforehand by a voluntary  
21 discussant (“presenter”), who presented the facts in the admission (according to the  
22 structure shown in Figure 1). Electronic slides and flipcharts were used to transport case  
23 information. Original test results were revealed by the presenter during the discussion  
24 only when requested by the group of students. Furthermore, the presenter summarised  
25 the differential diagnosis, important pathophysiological features of the case at the end of  
26 the session and provided a short take home message. A moderating medical student  
27 (“moderator”) was trained in case presentation and facilitated a reasonable approach to  
28 the patient encounter in close communication with the discussants. In the discussion the  
29 moderator helped the students develop their diagnostic strategy by co-evaluating their  
30 requested findings and the reasoning employed. Supervision of the correctness of  
31 medical facts and the correct diagnostic approach were ultimately granted by a clinician  
32 who could stop the discussion at any point when faulty reasoning was evident or  
33 discussants explicitly requested the facilitation of an experienced physician. We varied  
34 the staff between each Live-CCD to minimise effects of personal teacher characteristics.  
35 Live sessions typically lasted 90 minutes and were recorded with multiple cameras.  
36  
37  
38  
39  
40  
41  
42  
43  
44  
45  
46  
47  
48  
49  
50  
51  
52  
53  
54  
55  
56  
57  
58  
59  
60

1  
2  
3  
4 Students in the Video-CCD format worked on a single-learner multimedia workstation  
5  
6 on which a video recording of the Live-CCD were displayed. These recordings also  
7  
8 contained the electronic slide presentation from the Live-CCD and enabled  
9  
10 simultaneous observation of the discussion from multiple camera angles. Participants  
11  
12 could pause and partially skip the videos.  
13

14 In the Paper-Cases group participants received the case information of each CCD  
15  
16 section sequentially (i.e. admission, discussion, summary) in a print format. In both  
17  
18 single-learner formats students could choose their personal working speed with no time  
19  
20 limit. In each of the three formats full access to the internet was permitted for additional  
21  
22 information.  
23  
24  
25  
26

### 27 **Study design**

28  
29 We conducted a single-center randomised controlled trial consisting of a total of five  
30  
31 course sessions with a parallel design (see Figure 2): In an introductory session (T\_0)  
32  
33 participants were introduced to the principles of the CCD approach and the sequence of  
34  
35 this trial. In the experimental phase, participants attended three weekly interventional  
36  
37 course sessions of 90 minutes each in one of the three aforementioned groups with the  
38  
39 respective CCD formats. T\_1 testing was carried out at the end of the last experimental  
40  
41 course session. Two weeks after completion of the interventional courses a delayed  
42  
43 knowledge application post-test (T\_2) was conducted.  
44  
45

46 \*\*\*\*\*

47  
48 Insert Figure 2 about here

49 \*\*\*\*\*  
50  
51  
52  
53  
54  
55  
56  
57  
58  
59  
60

## Instruments

Learning outcomes with respect to clinical reasoning were measured with a knowledge application test that consisted of 29 items (i.e. a maximum of 29 points could be achieved). The test was to be filled out within 45 minutes and comprised multiple choice items, key feature problems and problem-solving tasks,[27] addressing the conceptual, strategic, and conditional knowledge of the participants. Overall test reliability was satisfactory (Cronbach's  $\alpha = .71$ ).

Subjective learning outcomes were measured at T\_1 with a short questionnaire consisting of 9 items (e.g. "I learned a lot during the CCD course", "The CCD course increased my learning " or "I recommend the implementation of the CCD teaching format into the curriculum"). Participants were asked to rate these items on a Likert scale ranging from 1 (I don't agree) to 5 (I fully agree). Reliability of the corresponding scale was good (Cronbach's  $\alpha = .95$ ). Additionally, study participants were asked to share their views on positive and negative aspects of the respective training format through open items at the end of the questionnaire.

## Statistical Analysis

The required sample size (N = 128) was estimated to detect medium effect sizes with a power of 80% and a significance level of  $\alpha = .05$ . For between-group analyses, ANOVAs were conducted with *post-hoc* Bonferroni tests for multiple comparisons.

## Results

### Preliminary analyses

1  
2  
3  
4 Prior knowledge (T<sub>0</sub>) did not differ across groups, with  $M = 5.34$ ;  $SD = 1.93$  for Live-  
5  
6 CCD,  $M = 4.76$ ;  $SD = 1.90$  for Video-CCD, and  $M = 5.76$ ;  $SD = 2.24$  for Paper-Cases  
7  
8 with  $F(2,87) = 1.78$ ,  $p = .174$  (n.s.). Gender distribution was skewed between the  
9  
10 experimental groups due to drop-out, but did not affect the learning outcomes as male  
11  
12 students ( $M = 12.33$ ;  $SD = 4.25$ ) and female students ( $M = 10.80$ ;  $SD = 3.50$ ) did not  
13  
14 differ significantly in the knowledge application post-test,  $F(2,88) = 3.37$ ,  $p = .07$  (n.s.).  
15  
16  
17  
18

### 19 **Effects of the CCD format on learning outcomes related to Clinical Reasoning**

20  
21 Experimental groups differed significantly with respect to the knowledge application  
22  
23 post-test (see Table 1),  $F(2,87) = 27.07$ ,  $p = .000$ , partial  $\eta^2 = .384$ . The Live-CCD  
24  
25 group ( $M = 14.10$ ;  $SD = 3.32$ ) outperformed both the Video-CCD ( $M = 11.69$ ;  $SD =$   
26  
27  $3.34$ ) and the Paper-Cases group ( $M = 8.5$ ;  $SD = 2.44$ ). Post hoc Bonferroni tests  
28  
29 revealed significant differences between Live-CCD and Video-CCD ( $p = .011$ ) as well  
30  
31 as the Paper-Cases group ( $p = .000$ ). The difference in the knowledge application post-  
32  
33 test between Video-CCD and the Paper-Cases group was also significant ( $p = .000$ ).  
34  
35

36 Two weeks after course completion, the effect of the teaching format was still found in  
37  
38 a delayed knowledge application post-test,  $F(2,87) = 30.91$ ,  $p = .000$ , partial  $\eta^2 = .415$ .  
39  
40 Both Live-CCD ( $M = 13.36$ ;  $SD = 3.23$ ) and the Video-CCD ( $M = 11.84$ ;  $SD = 2.92$ )  
41  
42 outperformed the Paper-Cases group ( $M = 7.89$ ;  $SD = 2.41$ ). Post hoc Bonferroni tests  
43  
44 revealed significant differences between the Live-CCD and Paper-Cases group ( $p =$   
45  
46  $.000$ ) as well as between the Video-CCD and Paper-Cases group ( $p = .000$ ). However,  
47  
48 the difference between Live-CCD and Video-CCD was not significant in the delayed  
49  
50 knowledge application post-test ( $p = .146$ ).  
51  
52  
53  
54  
55  
56  
57  
58  
59  
60

Table 1. Overview of the findings of the study.

|                                         | Teaching format |        |               |        |               |        |
|-----------------------------------------|-----------------|--------|---------------|--------|---------------|--------|
|                                         | Live-CCD        |        | Video-CCD     |        | Paper-Cases   |        |
|                                         | M               | (SD)   | M             | (SD)   | M             | (SD)   |
| Knowledge application pre-test          | 5.34            | (1.92) | 4.76          | (1.90) | 5.76          | (2.24) |
|                                         | <i>n</i> = 30   |        | <i>n</i> = 27 |        | <i>n</i> = 33 |        |
| Knowledge application post-test         | 14.10           | (3.32) | 11.68         | (3.34) | 8.50          | (2.44) |
|                                         | <i>n</i> = 30   |        | <i>n</i> = 27 |        | <i>n</i> = 33 |        |
| Delayed knowledge application post-test | 13.36           | (3.23) | 11.84         | (2.92) | 7.89          | (2.41) |
|                                         | <i>n</i> = 30   |        | <i>n</i> = 27 |        | <i>n</i> = 33 |        |
| Subjective learning outcomes            | 4.20            | (.63)  | 3.18          | (1.24) | 3.00          | (.99)  |
|                                         | <i>n</i> = 30   |        | <i>n</i> = 27 |        | <i>n</i> = 31 |        |

### Effects of the CCD format on subjective learning outcomes

Experimental groups differed significantly with respect to subjective learning outcomes (see Table 1),  $F(2,85) = 13.16$ ,  $p = .000$ , partial  $\eta^2 = .236$ . Participants of the Live-CCD group ( $M = 4.20$ ;  $SD = .63$ ) assigned better ratings to their course format than participants in the Video-CCD group ( $M = 3.18$ ;  $SD = 1.24$ ) and the Paper-Cases group ( $M = 3.0$ ;  $SD = .99$ ). Post hoc Bonferroni tests showed that the Live-CCD differed from the Video-CCD ( $p = .001$ ) and the Paper-Cases group ( $p = .000$ ) in this regard. An additional Duncan post-hoc test confirmed that the Video-CCD and the Paper-Cases group did not differ from each other in this regard ( $p = .48$ ).

To investigate the relations between the subjective assessment and the knowledge application tests applied at the end and two weeks after the course, we calculated correlations between the different outcome measures. Subjective learning outcomes correlated on a medium level with both the knowledge application post-test ( $r = .343$ ,  $n$

1  
2  
3  
4 = 88,  $p = .001$ ) and the delayed knowledge application post-test ( $r = .339$ ,  $n = 88$ ,  $p =$   
5  
6 .001).

7  
8 In the Live-CCD group, 83% of the students were in favour of implementing routine  
9  
10 Live-CCD into the medical curriculum. Only 45% and 31% of students from the Video-  
11  
12 CCD and Paper-Cases groups voted for an implementation of their respective course in  
13  
14 the curriculum. With respect to the open items from the subjective learning outcomes  
15  
16 questionnaire, participants from all groups praised the quality of the cases. Participants  
17  
18 from the Live-CCD group particularly valued their course format for providing an  
19  
20 opportunity to practice “diagnostic thinking” and the “focus on practice elements”. They  
21  
22 also mentioned that “you can look up theoretical knowledge, but you can’t look up  
23  
24 applied knowledge”. Students in the Video-CCD group, on the other hand, praised  
25  
26 features of the digital learning environment as they could “pause, reflect, or quickly do a  
27  
28 Google search” when watching the case discussions. However, they also criticised it  
29  
30 was not possible for them to “participate in a more active way”.  
31  
32  
33  
34  
35  
36

### 37 **Discussion**

38  
39 This randomised controlled study shows that even relatively short CCD interventions  
40  
41 can lead to improved and sustainable learning outcomes with respect to clinical  
42  
43 reasoning. This provides evidence that the CCD approach, which is based on  
44  
45 Clinicopathological Conferences, is an effective teaching resource to foster clinical  
46  
47 reasoning skills in medical students. We had hypothesised that a more interactive course  
48  
49 format would result in an improvement of clinical reasoning skills when compared with  
50  
51 less interactive formats. Results show that the Live-CCD indeed leads to the highest  
52  
53 learning outcomes in medical students compared to less interactive formats. Consistent  
54  
55  
56  
57  
58  
59  
60

1  
2  
3  
4 with our hypothesis, clinical reasoning skills, as measured with our knowledge  
5 application test, had the highest gain in the Live-CCD group. These positive effects of  
6 the CCD teaching format on clinical reasoning skills proved sustainable as shown by the  
7 results in the delayed knowledge application post-test. Overall, these results are in line  
8 with a recently published study on diagnostic reasoning[28] where students who worked  
9 in pairs were more accurate in their diagnosis than individual students despite having  
10 comparable knowledge. Collaborative clinical reasoning has thus far been  
11 underrepresented in the literature, yet seems to solve many of the educational problems  
12 regarding diagnostic errors.[29]

13  
14  
15  
16  
17  
18  
19  
20  
21  
22  
23 The significant difference between the Live-CCD and the Video-CCD group can be  
24 explained by the findings of a meta-analysis that showed technology-assisted single-  
25 person learning to be inferior to group learning because of the decreased social  
26 interaction.[30] However, it is important to note that two weeks after the course,  
27 participants of the Live-CCD and Video-CCD groups did not differ significantly  
28 anymore while both groups still clearly outperformed the Paper-Case group. In other  
29 words, watching a video of the live case discussion was found to be more beneficial for  
30 learners regarding their clinical reasoning skills than just reading the printed cases.  
31 Subjective learning outcomes suggest that students prefer the live discussion over the  
32 other formats and were linked to their performance in the knowledge application test.  
33  
34  
35  
36  
37  
38  
39  
40  
41  
42  
43  
44  
45  
46  
47  
48  
49  
50  
51  
52  
53  
54  
55  
56  
57  
58  
59  
60  
Additional qualitative data from the open item answers suggests that the Live-CCD  
format supported students in performing clinical reasoning and that the active  
discussion of cases was particularly valued by the students.

### **Generalisability**



1  
2  
3  
4 The conclusions of this study are applicable to a broader audience of medical students.  
5  
6 The CCD approach and its respective formats can easily be implemented in routine  
7  
8 medical education. Peer teaching courses hold the promise of being more easy to install  
9  
10 and more easy to staff than courses led by faculty. The study population consisting of  
11  
12 students with heterogeneous levels of clinical experience implies that the CCD is an  
13  
14 effective teaching format not only for students at the beginning of their clinical career  
15  
16 but also for intermediate students. On the other hand, generalisability is potentially  
17  
18 limited as only students from one medical school participated in our study.  
19  
20  
21  
22

### 23 **Limitations of the study**

24  
25 There are certain limitations of this study that have to be addressed: One important  
26  
27 limitation is the single-centre nature of this study and the relatively small sample size.  
28  
29 Before the CCD approach can be implemented on a larger scale, a validation of our  
30  
31 findings is therefore required. Caution is clearly warranted with the effect sizes shown  
32  
33 in this trial, as it has been shown that effect sizes of learning intervention trials tend to  
34  
35 be inflated compared to the effectiveness of the intervention when used in routine  
36  
37 education.[31] Against this backdrop, we suggest replication to further validate the  
38  
39 results found in this study and strengthen the outlined implications.  
40  
41  
42  
43  
44

### 45 **Implications for policy makers / Future research questions**

46  
47 Based on our findings, the CCD approach is a useful asset for medical educators to  
48  
49 widen the range of clinical reasoning teaching tools. Live-CCD can thus be seen as a  
50  
51 prime candidate for routine implementation in clinical reasoning curricula. Future  
52  
53 research should aim to identify which Live-CCD elements (i.e. the roles, case contents,  
54  
55  
56  
57  
58  
59  
60

1  
2  
3  
4 or the course structure) contribute in which way to the improvement of clinical  
5 reasoning skills in medical students. Regarding the Video-CCD, means of instructional  
6 support to increase the effectiveness and interactivity of the video-based format should  
7  
8 be investigated in an attempt to exploit its full potential.  
9  
10  
11

## 12 **Acknowledgements**

13  
14  
15 The authors thank Johanna Huber and her team for technical support with the  
16 evaluation, Thomas Brendel and Thomas Bischoff for help with the video production  
17 and Mark S. Pecker for critical reading of our manuscript and valuable suggestions. The  
18 authors also thank the CCD student discussants and moderators for their contributions.  
19  
20 We wish to sincerely address our gratitude to the CCD team for organisational support  
21 with the study: Nora Koenemann, Simone Reichert, Sandra Petrenz, Fabian Haak,  
22 Bjoern Stolte, Simon Berhe, Bastian Brandt, and Thomas Lautz. Marc Weidenbusch  
23 wishes to express special thanks to Bernd Gansbacher for introduction to CCDs.  
24  
25  
26  
27  
28  
29  
30  
31  
32  
33  
34

## 35 **Funding statement**

36  
37 This work was supported by the German Federal Ministry of Education and Research  
38 (grant no. 01PL12016) and an intramural grant of the Medical Faculty of the University  
39 of Munich (Lehre@LMU).  
40  
41  
42  
43  
44  
45

## 46 **Competing Interests**

47  
48 Marc Weidenbusch declares to have no conflict of interest.

49  
50 Benedikt Lenzer declares to have no conflict of interest.

51  
52 Maximilian Sailer declares to have no conflict of interest.  
53  
54  
55  
56  
57  
58  
59  
60

1  
2  
3  
4 Christian Strobel declares to have no conflict of interest.

5  
6 Raphael Kunisch declares to have no conflict of interest.

7  
8 Jan Kiesewetter declares to have no conflict of interest.

9  
10 Martin R. Fischer declares to have no conflict of interest.

11  
12 Jan M. Zottmann declares to have no conflict of interest.

### 13 14 15 16 17 **Author contributions**

18  
19 MW, BL, MF and JZ planned the study.

20  
21 MW, BL and CS were responsible for data acquisition.

22  
23 MW, BL, RK, JK, JZ and MS analysed and interpreted the data.

24  
25 MW, BL and JZ drafted the manuscript, all authors contributed significant intellectual  
26  
27 content and all authors gave final approval of the version to be published.

### 28 29 30 31 32 **Data sharing statement**

33  
34 Dataset and detailed information about the CCD formats is available upon request.

### 35 36 37 38 39 **References**

40  
41 1. Frank JR, Snell LS, Cate OT, Holmboe ES, Carraccio C, Swing SR, et al.

42  
43 Competency-based medical education: theory to practice. Medical teacher.

44  
45 2010;32(8):638-45.

46  
47 2. V. MMFdBDe. Nationaler Kompetenzbasierter Lernzielkatalog Medizin

48  
49 (NKLM). Germany: MFT Medizinischer Fakultätentag der Bundesrepublik

50  
51 Deutschland e. V.; 2015.

- 1  
2  
3  
4 3. Harasym PH, Tsai TC, Hemmati P. Current trends in developing medical  
5 students' critical thinking abilities. *The Kaohsiung journal of medical sciences*.  
6  
7  
8 2008;24(7):341-55.
- 9  
10 4. Donaldson MS, Corrigan JM, Kohn LT. *To err is human: building a safer health*  
11 *system*. Washington: National Academies Press; 2000.
- 12  
13 5. Kassirer JP. Teaching clinical medicine by iterative hypothesis testing: let's  
14 preach what we practice. *New England Journal of Medicine*. 1983;309(15):921-3.
- 15  
16 6. Hege I, Ropp V, Adler M, Radon K, Mäscher G, Lyon h, et al. Experiences with  
17 different integration strategies of case-based e-learning. *Medical teacher*.  
18  
19 2007;29(8):791-7.
- 20  
21 7. Cannon WB. *The Case Method of Teaching Systematic Medicine*. The Boston  
22 *Medical and Surgical Journal*. 1900;142(2):31-6.
- 23  
24 8. Eva KW. What every teacher needs to know about clinical reasoning. *Medical*  
25 *education*. 2005;39(1):98-106.
- 26  
27 9. Harris NL. *Case Records of the Massachusetts General Hospital — Continuing*  
28 *to Learn from the Patient*. *New England Journal of Medicine*. 2003;348(22):2252-4.
- 29  
30 10. Cabot RC. *Case teaching in medicine: A series of graduated exercises in the*  
31 *differential diagnosis, prognosis and treatment of actual cases of disease*: Heath; 1906.
- 32  
33 11. Sturdy S. *Knowing Cases: Biomedicine in Edinburgh, 1887—1920*. *Social*  
34 *studies of science*. 2007;37(5):659-89.
- 35  
36 12. Relman AS. *Two Views*. *New England Journal of Medicine*.  
37  
38 1979;301(20):1112-3.
- 39  
40  
41  
42  
43  
44  
45  
46  
47  
48  
49  
50  
51  
52  
53  
54  
55  
56  
57  
58  
59  
60

- 1  
2  
3  
4 13. Ertmer PA, Newby TJ. Behaviorism, Cognitivism, Constructivism: Comparing  
5  
6 Critical Features from an Instructional Design Perspective. *Performance Improvement*  
7  
8 *Quarterly*. 1993;6(4):50-72.
- 9  
10 14. Merseth KK. Cases and case methods in teacher education. *Handbook of*  
11  
12 *research on teacher education*. 1996;2:722-44.
- 13  
14 15. Powers BW, Navathe AS, Jain SH. Medical education's authenticity problem.  
15  
16 *BMJ*. 2014;348.
- 17  
18 16. Chi MTH, Wylie R. The ICAP Framework: Linking Cognitive Engagement to  
19  
20 *Active Learning Outcomes*. *Educational Psychologist*. 2014;49(4):219-43.
- 21  
22 17. Zottmann JM, Stegmann K, Strijbos J-W, Vogel F, Wecker C, Fischer F.  
23  
24 *Computer-supported collaborative learning with digital video cases in teacher*  
25  
26 *education: The impact of teaching experience on knowledge convergence*. *Computers in*  
27  
28 *Human Behavior*. 2013;29(5):2100-8.
- 29  
30 18. Hall D, Buzwell S. The problem of free-riding in group projects: Looking  
31  
32 *beyond social loafing as reason for non-contribution*. *Active Learning in Higher*  
33  
34 *Education*. 2013;14(1):37-49.
- 35  
36 19. Duncan RG, Rivet AE. *Science Learning Progressions*. *Science*.  
37  
38 2013;339(6118):396-7.
- 39  
40 20. De Menezes S, Premnath D. Near-peer education: a novel teaching program.  
41  
42 *International journal of medical education*. 2016;7:160.
- 43  
44 21. Ince-Cushman D, Rudkin T, Rosenberg E. Supervised near-peer clinical  
45  
46 *teaching in the ambulatory clinic: an exploratory study of family medicine residents'*  
47  
48 *perspectives*. *Perspectives on medical education*. 2015;4(1):8-13.
- 49  
50  
51  
52  
53  
54  
55  
56  
57  
58  
59  
60

- 1  
2  
3  
4 22. Chi MT. Active-constructive-interactive: A conceptual framework for  
5 differentiating learning activities. *Topics in Cognitive Science*. 2009;1(1):73-105.  
6  
7  
8 23. Ruiz JG, Mintzer MJ, Leipzig RM. The Impact of E-Learning in Medical  
9 Education. *Academic Medicine*. 2006;81(3):207-12.  
10  
11 24. Kotton DN, Muse VV, Nishino M. Case 2-2012. *New England Journal of*  
12 *Medicine*. 2012;366(3):259-69.  
13  
14 25. Marks PW, Zukerberg LR. Case 30-2004. *New England Journal of Medicine*.  
15 2004;351(13):1333-41.  
16  
17 26. Uyeki TM, Sharma A, Branda JA. Case 40-2009. *New England Journal of*  
18 *Medicine*. 2009;361(26):2558-69.  
19  
20 27. Braun LT, Zottmann JM, Adolf C, Lottspeich C, Then C, Wirth S, et al.  
21 Representation scaffolds improve diagnostic efficiency in medical students. *Medical*  
22 *education*. 2017; 51(11):1118-1126.  
23  
24 28. Hautz WE, Kämmer JE, Schaubert SK, Spies CD, Gaissmaier W. Diagnostic  
25 performance by medical students working individually or in teams. *Jama*.  
26 2015;313(3):303-4.  
27  
28 29. Schmidt HG, Mamede S. How to improve the teaching of clinical reasoning: a  
29 narrative review and a proposal. *Medical education*. 2015;49(10):961-73.  
30  
31 30. Lou Y, Abrami PC, d'Apollonia S. Small Group and Individual Learning with  
32 Technology: A Meta-Analysis. *Review of Educational Research*. 2001;71(3):449-521.  
33  
34 31. Springer L, Stanne ME, Donovan SS. Effects of Small-Group Learning on  
35 Undergraduates in Science, Mathematics, Engineering, and Technology: A Meta-  
36 Analysis. *Review of Educational Research*. 1999;69(1):21-51.  
37  
38  
39  
40  
41  
42  
43  
44  
45  
46  
47  
48  
49  
50  
51  
52  
53  
54  
55  
56  
57  
58  
59  
60

## Figure legends

*Figure 1: Live-CCD Structure.* CCD sessions are divided into three parts: In the *admission* part the presenting student shows the discussants his prepared slides (based on the original NEJM-case record), after which the group has to agree on an assessment of the patient under discussion. In the interactive *discussion* part the students prioritise the medical problems, link them to possible etiologies and order tests to further corroborate or discard differential diagnoses. After all the tests that were performed in the case record, the discussants order the putative diagnostic test. The result is disclosed along with the pathological discussion and “take home messages” on important differentials in the third part of the session. CC chief complaint, HPI history of present illness, PMH past medical history, Meds medications, SH social history, FH family history, ROS review of systems, VS vital signs, PE physical examination, CMP comprehensive metabolic panel, CBC complete blood count, PT prothrombin time, PTT partial thromboplastin time, UA urine analysis, ECG electrocardiogram, CXR chest radiograph.

*Figure 2: Study design.* Full data sets of 90 medical students were analysed. T\_0: knowledge application pre-test, T\_1: knowledge application post-test, T\_2: delayed knowledge application post-test.

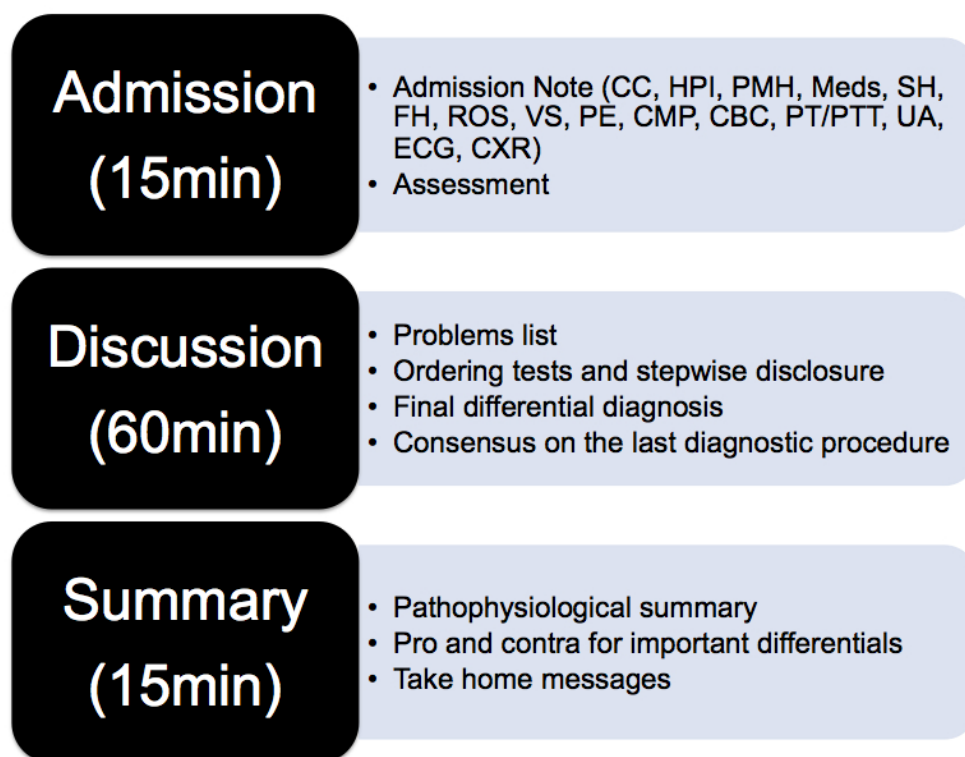

Figure 1: Live-CCD Structure. CCD sessions are divided into three parts: In the admission part the presenting student shows the discussants his prepared slides (based on the original NEJM-case record), after which the group has to agree on an assessment of the patient under discussion. In the interactive discussion part the students prioritise the medical problems, link them to possible etiologies and order tests to further corroborate or discard differential diagnoses. After all the tests that were performed in the case record, the discussants order the putative diagnostic test. The result is disclosed along with the pathological discussion and "take home messages" on important differentials in the third part of the session. CC chief complaint, HPI history of present illness, PMH past medical history, Meds medications, SH social history, FH family history, ROS review of systems, VS vital signs, PE physical examination, CMP comprehensive metabolic panel, CBC complete blood count, PT prothrombin time, PTT partial thromboplastin time, UA urine analysis, ECG electrocardiogram, CXR chest radiograph.



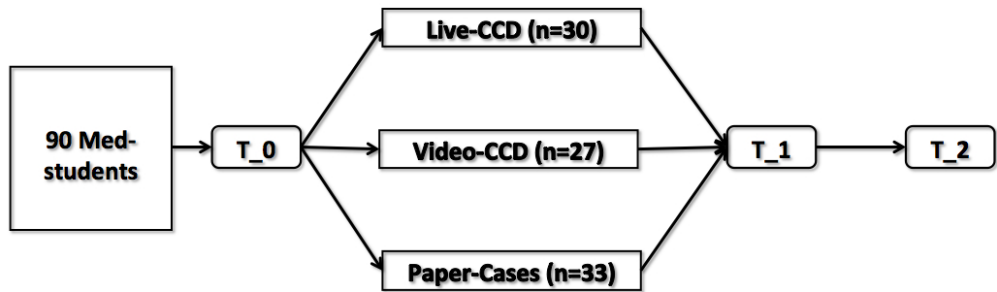

Figure 2: Study design. Full data sets of 90 medical students were analysed. T\_0: knowledge application pre-test, T\_1: knowledge application post-test, T\_2: delayed knowledge application post-test.

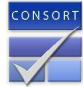

## CONSORT 2010 checklist of information to include when reporting a randomised trial\*

| Section/Topic                    | Item No | Checklist item                                                                                                                                                                              | Reported on page No |
|----------------------------------|---------|---------------------------------------------------------------------------------------------------------------------------------------------------------------------------------------------|---------------------|
| <b>Title and abstract</b>        |         |                                                                                                                                                                                             |                     |
|                                  | 1a      | Identification as a randomised trial in the title                                                                                                                                           | 1                   |
|                                  | 1b      | Structured summary of trial design, methods, results, and conclusions (for specific guidance see CONSORT for abstracts)                                                                     | 2-3                 |
| <b>Introduction</b>              |         |                                                                                                                                                                                             |                     |
| Background and objectives        | 2a      | Scientific background and explanation of rationale                                                                                                                                          | 4-6                 |
|                                  | 2b      | Specific objectives or hypotheses                                                                                                                                                           | 6                   |
| <b>Methods</b>                   |         |                                                                                                                                                                                             |                     |
| Trial design                     | 3a      | Description of trial design (such as parallel, factorial) including allocation ratio                                                                                                        | 7-9                 |
|                                  | 3b      | Important changes to methods after trial commencement (such as eligibility criteria), with reasons                                                                                          | not applicable      |
| Participants                     | 4a      | Eligibility criteria for participants                                                                                                                                                       | 7                   |
|                                  | 4b      | Settings and locations where the data were collected                                                                                                                                        | 7                   |
| Interventions                    | 5       | The interventions for each group with sufficient details to allow replication, including how and when they were actually administered                                                       | 7-9                 |
| Outcomes                         | 6a      | Completely defined pre-specified primary and secondary outcome measures, including how and when they were assessed                                                                          | 9-10                |
|                                  | 6b      | Any changes to trial outcomes after the trial commenced, with reasons                                                                                                                       | not applicable      |
| Sample size                      | 7a      | How sample size was determined                                                                                                                                                              | 10                  |
|                                  | 7b      | When applicable, explanation of any interim analyses and stopping guidelines                                                                                                                | not applicable      |
| <b>Randomisation:</b>            |         |                                                                                                                                                                                             |                     |
| Sequence generation              | 8a      | Method used to generate the random allocation sequence                                                                                                                                      | 7                   |
|                                  | 8b      | Type of randomisation; details of any restriction (such as blocking and block size)                                                                                                         | 7                   |
| Allocation concealment mechanism | 9       | Mechanism used to implement the random allocation sequence (such as sequentially numbered containers), describing any steps taken to conceal the sequence until interventions were assigned | not applicable      |
| Implementation                   | 10      | Who generated the random allocation sequence, who enrolled participants, and who assigned participants to interventions                                                                     | not applicable      |
| Blinding                         | 11a     | If done, who was blinded after assignment to interventions (for example, participants, care providers, those                                                                                | not applicable      |

|    |                          |                                                                                                                     |                |
|----|--------------------------|---------------------------------------------------------------------------------------------------------------------|----------------|
| 1  |                          |                                                                                                                     |                |
| 2  |                          | assessing outcomes) and how                                                                                         |                |
| 3  |                          |                                                                                                                     |                |
| 4  |                          | 11b If relevant, description of the similarity of interventions                                                     | not applicable |
| 5  | Statistical methods      | 12a Statistical methods used to compare groups for primary and secondary outcomes                                   | 10             |
| 6  |                          | 12b Methods for additional analyses, such as subgroup analyses and adjusted analyses                                | 10             |
| 7  |                          |                                                                                                                     |                |
| 8  | <b>Results</b>           |                                                                                                                     |                |
| 9  | Participant flow (a      | 13a For each group, the numbers of participants who were randomly assigned, received intended treatment, and        | attached as    |
| 10 | diagram is strongly      | were analysed for the primary outcome                                                                               | supplemental   |
| 11 | recommended)             | 13b For each group, losses and exclusions after randomisation, together with reasons                                | 7              |
| 12 | Recruitment              | 14a Dates defining the periods of recruitment and follow-up                                                         | not applicable |
| 13 |                          | 14b Why the trial ended or was stopped                                                                              | not applicable |
| 14 | Baseline data            | 15 A table showing baseline demographic and clinical characteristics for each group                                 | attached as    |
| 15 |                          |                                                                                                                     | supplemental   |
| 16 |                          |                                                                                                                     |                |
| 17 | Numbers analysed         | 16 For each group, number of participants (denominator) included in each analysis and whether the analysis was      | 11-12          |
| 18 |                          | by original assigned groups                                                                                         |                |
| 19 | Outcomes and             | 17a For each primary and secondary outcome, results for each group, and the estimated effect size and its           | 10-13          |
| 20 | estimation               | precision (such as 95% confidence interval)                                                                         |                |
| 21 |                          | 17b For binary outcomes, presentation of both absolute and relative effect sizes is recommended                     | not applicable |
| 22 | Ancillary analyses       | 18 Results of any other analyses performed, including subgroup analyses and adjusted analyses, distinguishing       | not applicable |
| 23 |                          | pre-specified from exploratory                                                                                      |                |
| 24 | Harms                    | 19 All important harms or unintended effects in each group (for specific guidance see CONSORT for harms)            | not applicable |
| 25 |                          |                                                                                                                     |                |
| 26 |                          |                                                                                                                     |                |
| 27 | <b>Discussion</b>        |                                                                                                                     |                |
| 28 | Limitations              | 20 Trial limitations, addressing sources of potential bias, imprecision, and, if relevant, multiplicity of analyses | 15             |
| 29 | Generalisability         | 21 Generalisability (external validity, applicability) of the trial findings                                        | 14-15          |
| 30 | Interpretation           | 22 Interpretation consistent with results, balancing benefits and harms, and considering other relevant evidence    | 13-15          |
| 31 |                          |                                                                                                                     |                |
| 32 | <b>Other information</b> |                                                                                                                     |                |
| 33 | Registration             | 23 Registration number and name of trial registry                                                                   | not applicable |
| 34 | Protocol                 | 24 Where the full trial protocol can be accessed, if available                                                      | 17             |
| 35 | Funding                  | 25 Sources of funding and other support (such as supply of drugs), role of funders                                  | 16             |
| 36 |                          |                                                                                                                     |                |
| 37 |                          |                                                                                                                     |                |

\*We strongly recommend reading this statement in conjunction with the CONSORT 2010 Explanation and Elaboration for important clarifications on all the items. If relevant, we also recommend reading CONSORT extensions for cluster randomised trials, non-inferiority and equivalence trials, non-pharmacological treatments, herbal interventions, and pragmatic trials. Additional extensions are forthcoming: for those and for up to date references relevant to this checklist, see [www.consort-statement.org](http://www.consort-statement.org).



# CONSORT

TRANSPARENT REPORTING of TRIALS

## CONSORT 2010 Flow Diagram

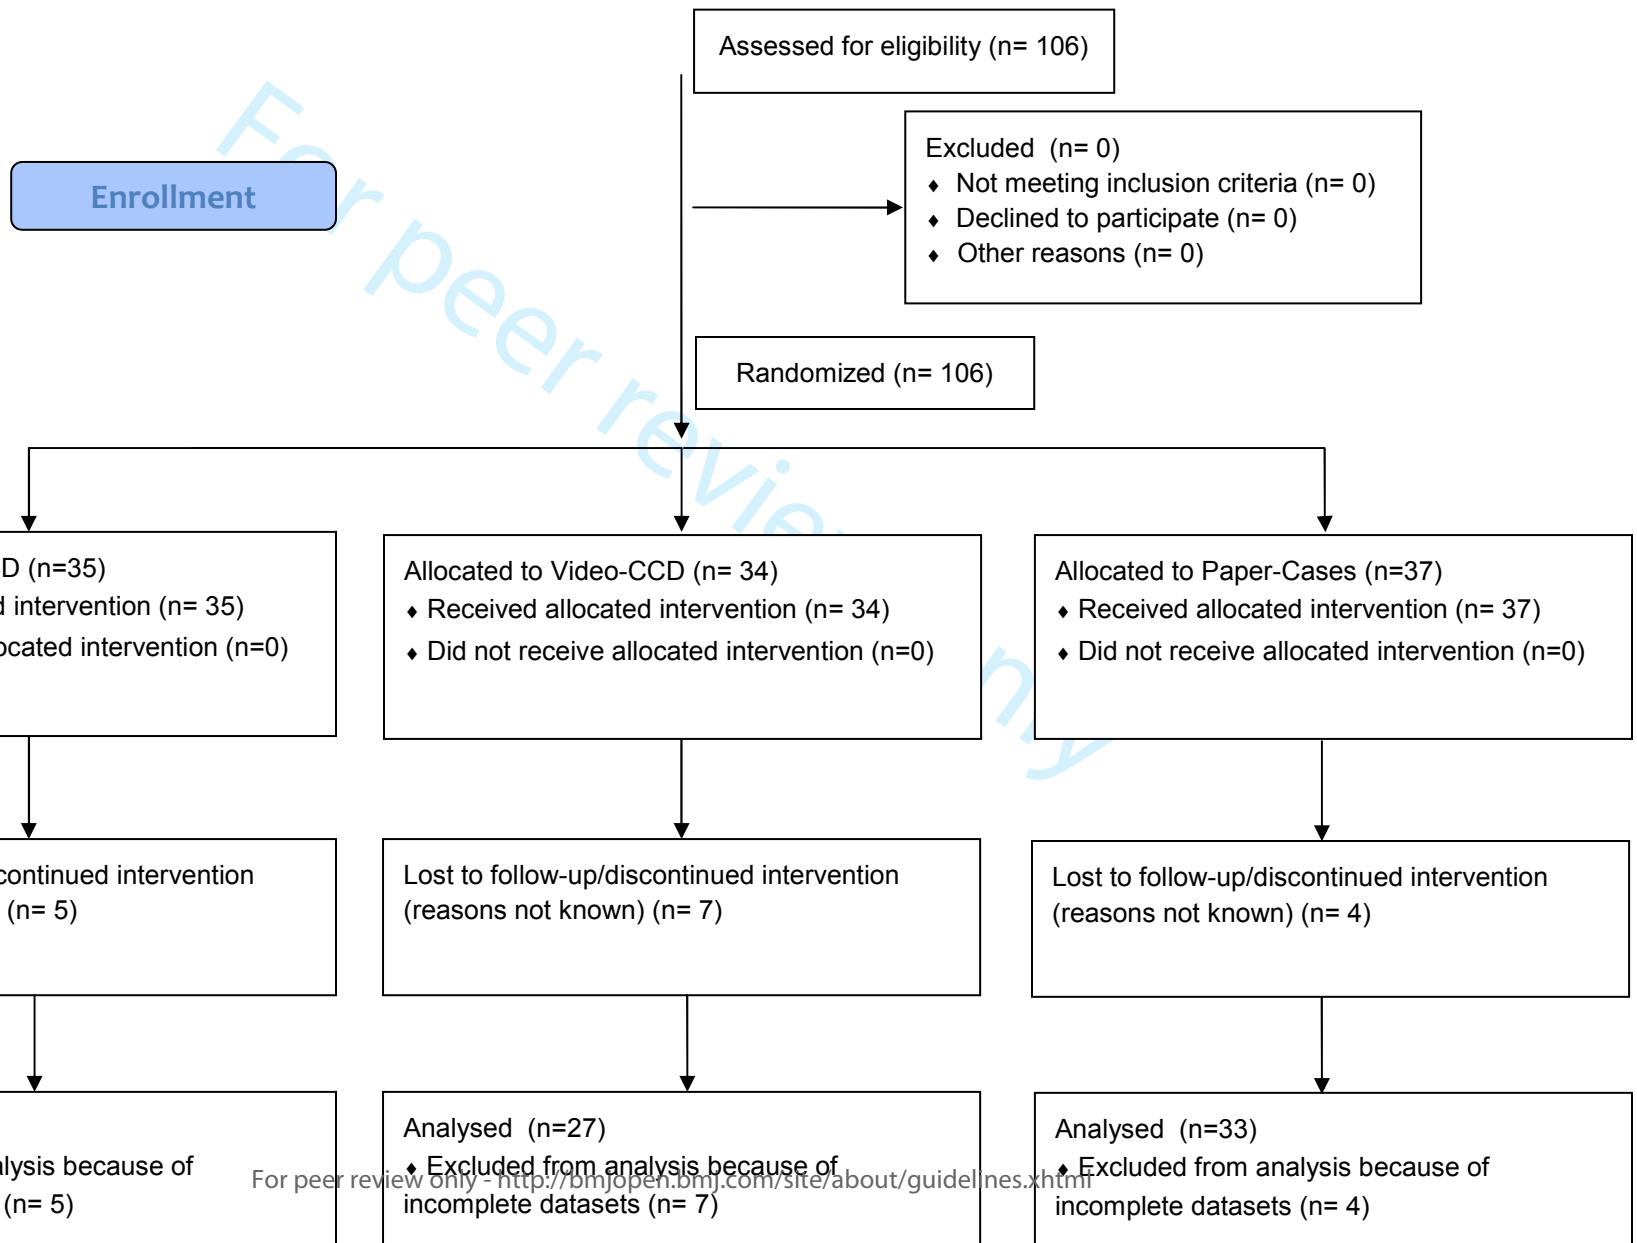

# BMJ Open

## Can Clinical Case Discussions foster clinical reasoning skills in undergraduate medical education? A randomised controlled trial

|                                 |                                                                                                                                                                                                                                                                                                                                                                                                                                                                                                                                                                                                                                                                                                                                                                        |
|---------------------------------|------------------------------------------------------------------------------------------------------------------------------------------------------------------------------------------------------------------------------------------------------------------------------------------------------------------------------------------------------------------------------------------------------------------------------------------------------------------------------------------------------------------------------------------------------------------------------------------------------------------------------------------------------------------------------------------------------------------------------------------------------------------------|
| Journal:                        | <i>BMJ Open</i>                                                                                                                                                                                                                                                                                                                                                                                                                                                                                                                                                                                                                                                                                                                                                        |
| Manuscript ID                   | bmjopen-2018-025973.R1                                                                                                                                                                                                                                                                                                                                                                                                                                                                                                                                                                                                                                                                                                                                                 |
| Article Type:                   | Research                                                                                                                                                                                                                                                                                                                                                                                                                                                                                                                                                                                                                                                                                                                                                               |
| Date Submitted by the Author:   | 19-Mar-2019                                                                                                                                                                                                                                                                                                                                                                                                                                                                                                                                                                                                                                                                                                                                                            |
| Complete List of Authors:       | Weidenbusch, Marc; University Hospital of LMU Munich, Institute for Medical Education; University Hospital of LMU Munich, Department of Internal Medicine IV<br>Lenzer, Benedikt; University Hospital of LMU Munich, Institute for Medical Education<br>Sailer, Maximilian; LMU Munich, Department of Psychology<br>Strobel, Christian; University Hospital of LMU Munich, Institute for Medical Education<br>Kunisch, Raphael; University Hospital of LMU Munich, Institute for Medical Education<br>Kiesewetter, Jan; University Hospital of LMU Munich, Institute for Medical Education<br>Fischer, Martin; University Hospital of LMU Munich, Institute for Medical Education<br>Zottmann, Jan; University Hospital of LMU Munich, Institute for Medical Education |
| <b>Primary Subject Heading</b>: | Medical education and training                                                                                                                                                                                                                                                                                                                                                                                                                                                                                                                                                                                                                                                                                                                                         |
| Secondary Subject Heading:      | Medical education and training                                                                                                                                                                                                                                                                                                                                                                                                                                                                                                                                                                                                                                                                                                                                         |
| Keywords:                       | Undergraduate medical education, Case-based learning, Clinical reasoning, Social interaction, Medical decision making                                                                                                                                                                                                                                                                                                                                                                                                                                                                                                                                                                                                                                                  |
|                                 |                                                                                                                                                                                                                                                                                                                                                                                                                                                                                                                                                                                                                                                                                                                                                                        |

SCHOLARONE™  
Manuscripts

## RESEARCH PAPER

**Can Clinical Case Discussions foster clinical reasoning skills in  
undergraduate medical education? A randomised controlled trial**

*Dr. med. Marc Weidenbusch<sup>1,2\*</sup>, Benedikt Lenzer<sup>2\*</sup>, Prof. Dr. phil. Maximilian Sailer<sup>3</sup>,  
Dr. phil. Christian Strobel<sup>2</sup>, Raphael Kunisch<sup>2</sup>, Dr. phil. Jan Kiesewetter<sup>2</sup>, Prof. Dr.  
med. Martin R. Fischer<sup>2</sup> & Dr. phil. Jan M. Zottmann<sup>2</sup>*

<sup>1</sup>Nephrologisches Zentrum, Medizinische Klinik und Poliklinik IV, Klinikum der  
Universität München, LMU München

<sup>2</sup>Institut für Didaktik und Ausbildungsforschung in der Medizin, Klinikum der  
Universität München, LMU München

<sup>3</sup>Department Psychologie, LMU München

\*equal contribution

*Corresponding author:*

Dr. phil. Jan M. Zottmann

Institut für Didaktik und Ausbildungsforschung in der Medizin

Klinikum der Universität München, LMU München

Pettenkoferstr. 8a, D-80336 Munich, Germany

Tel: +49 89 4400 57203

Fax: +49 89 4400 57202

E-Mail: [jan.zottmann@med.uni-muenchen.de](mailto:jan.zottmann@med.uni-muenchen.de)

**Word count:** 3600 words

**Keywords:** undergraduate medical education, case-based learning, clinical reasoning,  
social interaction, medical decision making

## Abstract

**Objective:** Fostering clinical reasoning is a mainstay of medical education. Based on the Clinicopathological Conferences, we propose a case-based peer teaching approach called Clinical Case Discussions (CCDs) to promote the respective skills in medical students. This study compares the effectiveness of different CCD formats with varying degrees of social interaction in fostering clinical reasoning.

**Design, Setting, Participants:** A single-center randomised controlled trial with a parallel design was conducted at a German university. The 106 study participants were stratified (age, gender, year of study, prior CCD participation, performance in a pre-test) and tested regarding their clinical reasoning skills right after CCD participation and two weeks later.

**Intervention:** Participants worked either within a live discussion group (Live-CCD), a group watching recordings of the live discussions (Video-CCD), or a group working with printed cases (Paper-Cases). The presentation of case information followed an admission-, discussion-, summary-sequence.

**Primary and secondary outcome measures:** Clinical reasoning skills were measured with a knowledge application test addressing the students' conceptual, strategic, and conditional knowledge. Additionally, subjective learning outcomes were assessed.

**Results:** With respect to learning outcomes, the Live-CCD group displayed the best results, followed by Video-CCD and Paper-Cases. No difference was found between Live-CCD and Video-CCD groups in the delayed post-test; both outperformed the Paper-Cases group. Regarding subjective learning outcomes, the Live-CCD received significantly better ratings than the other formats.

1  
2  
3  
4 **Conclusions:** This study demonstrates that the CCD approach is an effective and  
5 sustainable clinical reasoning teaching resource for medical students. Subjective  
6 learning outcomes underline the importance of learner (inter-)activity in the acquisition  
7 of clinical reasoning skills in the context of case-based learning. Higher efficacy of  
8 more interactive formats can be attributed to positive effects of collaborative learning.  
9 Future research should investigate how the Live-CCD format can further be improved  
10 and how video-based CCDs can be enhanced through instructional support.  
11  
12  
13  
14  
15  
16  
17  
18  
19  
20  
21  
22

## 23 **Article summary**

### 24 **Strengths and limitations of this study:**

- 25 • First empirical study on the implementation of Clinical Case Discussions in  
26 undergraduate medical education.
- 27 • Comparison of Clinical Case Discussions with differing grades of social  
28 interaction to determine their effectiveness on medical students' acquisition of  
29 clinical reasoning skills by between-group analyses.
- 30 • Implementation of multidimensional and multilayered test instruments in a pre-,  
31 post- and delayed post-test design to measure clinical reasoning skills by a  
32 knowledge application test and self-assessment.
- 33 • The knowledge application test utilized in this study did not allow for a more in-  
34 depth analysis of clinical reasoning skills (i.e. a distinction of conceptual,  
35 strategic, and conditional knowledge).
- 36  
37  
38  
39  
40  
41  
42  
43  
44  
45  
46  
47  
48  
49  
50  
51  
52  
53  
54  
55  
56  
57  
58  
59  
60



## Introduction

Curriculum developers face the challenge of implementing competence-oriented frameworks such as CanMEDS (Canada), the NKLM (Germany) or PROFILES (Switzerland), including the need to train clinical reasoning skills as a medical doctor's key competence.[1-3] As such, clinical reasoning skills are crucial not only for appropriate medical decision making, but also to avoid diagnostic errors and the associated harm for both patients and healthcare systems.[4]

Case-based learning has been proposed to foster clinical reasoning skills[5] and is well accepted amongst students.[6] Case-based learning found an early representation in Clinicopathological Conferences (CPC, first introduced by Cannon in 1900[7]) which are practiced until today. The Clinicopathological Conferences conducted at the Massachusetts General Hospital are published on a regular basis known as the *Case Records* series of the New England Journal of Medicine. In those CPCs the “medical mystery”[8] presented by the case under discussion calls readers to think about the possible diagnosis themselves, before it is finally disclosed at the last part of the CPC. Despite the absence of definitive evidence for efficacy as a teaching method, CPCs have widely been used in medical education since the early 20th century to foster clinical reasoning.[9-11] While these CPC-Case Records reaches lots of medical readers around the world, it has been criticised as being anachronistic with a diagnosing “star (i.e. the discussant), performing, acutely aware of being the center of attention”.[12]

Case-based learning formats are embedded in a context, which is known to promote learning better than providing facts in an abstract, non-contextual form.[13] A definition found in the review by Merseth suggests three essential elements of a case: A case is real (i.e. based on a real-life situation or event); it relies on careful research and study; it

1  
2  
3  
4 is “created explicitly for discussion and seeks to include sufficient detail and  
5  
6 information to elicit active analysis and interpretation by users”.[14] Cases may be  
7  
8 represented by means of text, pictures, videos, and the like. Realism and authenticity are  
9  
10 varying features of cases,[15] but particularly elaborated and authentic cases provide  
11  
12 increased diagnostic challenge, comprising an additional value for medical training.[16]  
13  
14 However, due to their setup, CPCs are often a passive learning situation for participants,  
15  
16 as they listen to the discussant laying out his or her clinical reasoning on the case under  
17  
18 discussion. According to the ICAP framework by Chi et al.,[17] teaching formats  
19  
20 increase their efficacy from passive < active < constructive < interactive learning  
21  
22 environments. Based on the ICAP model, any intervention that would lead to more  
23  
24 effective cognitive (i.e. constructive or interactive) learner activities should improve the  
25  
26 learning outcomes of that format. Especially when students interactively engage in  
27  
28 discussions among each other, learning is enhanced. Accordingly, case-based learning  
29  
30 has been found to be particularly beneficial in collaborative settings.[15] However,  
31  
32 another important aspect to consider in collaborative learning environments is that some  
33  
34 students may participate passively while others contribute disproportionately much. To  
35  
36 foster optimal learning effects, students should thus be encouraged to be interactively  
37  
38 engaged. One prerequisite to achieve self-guided learning in groups is a low threshold  
39  
40 for students to come forward with their questions and participate in ensuing  
41  
42 discussions.[18] To this end, peer teaching has been established as an effective tool to  
43  
44 stimulate discussions.[19] To make sure peer tutors are not overwhelmed in moderating  
45  
46 these discussions, the presence of an experienced clinician appears to be warranted[20]  
47  
48 in addition to a specific training of the tutors.  
49  
50  
51  
52  
53  
54  
55  
56  
57  
58  
59  
60

1  
2  
3  
4 Taken together, while traditional CPCs encompass some important dimensions of  
5 effective case-based learning environments, they are not systematically aiming at  
6 constructive or interactive learner activities that are known features of effective teaching  
7 formats.[17,21] Therefore, we introduced Clinical Case Discussions (CCD) in  
8 undergraduate medical education to account for these features. We still use the Case  
9 Records of the Massachusetts General Hospital,[9] as these cases exemplify realistic  
10 patient encounters and fulfill the criteria for an interactive collaborative learning process  
11 as explained above. In the CCD approach, cases are presented only until the hospital  
12 admission of the patient, followed by an interactive discussion about possible diagnoses  
13 and diagnostic strategies. After all test results have been discussed, the actual diagnosis  
14 is disclosed and the pitfalls and take-home messages of the case are summarised.

15  
16 To investigate the effectiveness of the CCD approach in undergraduate medical  
17 education, we designed an intervention trial and assessed clinical reasoning skills in  
18 medical students before and after *participating in live CCDs* or *being exposed* to video  
19 recordings of live CCDs. We compared these formats and its effects on clinical  
20 reasoning with the more traditional approach of working through written cases. When  
21 carrying out this randomised trial, we hypothesised that participation in live CCD  
22 sessions would lead to a higher increase of clinical reasoning skills than simply reading  
23 the cases. To better understand possible effects of the CCD learning environment with  
24 its social components on learning outcomes, participation in live CCDs as outlined  
25 above was additionally compared to the effects of watching videos of CCDs online.  
26 This comparison also seemed relevant from an economic point of view as video-  
27 streaming of lectures and seminars are prevalent at many institutions in higher  
28 education allowing for flexible and scalable access to learning materials.[22] To  
29  
30  
31  
32  
33  
34  
35  
36  
37  
38  
39  
40  
41  
42  
43  
44  
45  
46  
47  
48  
49  
50  
51  
52  
53  
54  
55  
56  
57  
58  
59  
60

investigate the potential of different CCD formats for regular curricular use, we also measured subjective learning outcomes after the intervention and correlated student self-assessments with objective changes in their clinical reasoning skills.

## Methods

### Participants / Ethics

Initially, we recruited 106 volunteer medical students at the Medical Faculty of LMU Munich. Randomisation was performed in a two-step procedure: First, we selected a sample of roughly 100 enrolled students. Next, we stratified participants by creating triplets on the basis of the variables age, gender, year of study, prior CCD participation and performance in a knowledge application pre-test. This was done in an effort to limit the risk of random misdistribution of the selected sample. From each triplet we randomly assigned participants to the experimental groups. A total of 90 participants eventually completed the study, 31 of them were male and 59 female. They were 20 to 41 years old ( $M = 23$ ;  $SD = 2.97$ ) and in their first to eighth clinical semester ( $M = 3.5$ ;  $SD = 1.78$ ).

The study was approved by the ethics committee of the Medical Faculty of LMU Munich (approval reference no. 222-15). Written informed consent was obtained from all study participants and they received a financial reimbursement of 50 Euros upon completion of the trial.

### Patient and public involvement

No patients or public were involved in this research.

## Study design

We conducted a single-center randomised controlled trial consisting of a total of five course sessions with a parallel design (see Figure 1). One week prior to the first CCD session, participants were introduced to the principles of the CCD approach and the sequence of this trial in an introductory session where they also took a knowledge application pre-test (T\_0). In the experimental phase, participants attended three weekly interventional course sessions of 90 minutes each in one of the three aforementioned groups with the respective CCD formats. Participants took a knowledge application post-test at the end of the last experimental course session (T\_1), four weeks after pre-testing. A delayed knowledge application post-test was conducted two weeks after completion of the interventional courses (T\_2); we deliberately chose that time interval to investigate the sustainability of possibly effects while balancing the risk of post-intervention confounding.[23]

\*\*\*\*\*

Insert Figure 1 about here

\*\*\*\*\*

## Materials

In all experimental groups the intervention was based on the same three, independent internal medicine cases. Chief complaints in these cases were paresthesia (first session), fever and respiratory failure (second session), and rapidly progressive respiratory failure (third session).[24-26] Cases were worked through in an iterative approach in different formats: (a) peer-moderated live case discussions in an interactive setting (Live-CCD,  $n = 30$ ), (b) a single-learner format utilizing an interactive multimedia platform displaying video recordings of the live case discussions (Video-CCD,  $n = 27$ ), and (c) a single-learner format in which the students worked with the original paper cases of the NEJM

(Paper-Cases,  $n = 33$ ). The cases were prepared in a way that participants in each format were exposed to the same case information.

## Procedure

In all three groups cases were presented in a specified structured manner similar to the original Clinicopathological Conferences (see Figure 2). In each format the students (“discussants”) had to fill out a form after the admission in which the case had to be summarised and a list of clinical problems and working diagnoses had to be provided. Subsequently, between discussion and summary a second case-summary had to be completed in which the final diagnostic test and the most likely diagnosis had to be proposed.

\*\*\*\*\*

Insert Figure 2 about here

\*\*\*\*\*

In the Live-CCD group, the case presentation was prepared beforehand by a voluntary discussant (“presenter”), who presented the facts in the admission (according to the structure shown in Figure 2). Electronic slides and flipcharts were used to transport case information. Original test results were revealed by the presenter during the discussion only when requested by the group of students. Furthermore, the presenter summarised the differential diagnosis, important pathophysiological features of the case at the end of the session and provided a short take home message. The moderating medical students (“moderator”) were recruited among previous CCD participants. They had experience in CCD moderation and had had an introductory training (two days) in higher education methods and group facilitation prior to the study. The moderator facilitated the discussion process and ensured a reasonable approach to the patient encounter (e.g. with

1  
2  
3  
4 respect to timing and hierarchy of ordered tests) in close communication with the  
5  
6 discussants. Moreover, the moderator helped students develop their diagnostic strategy  
7  
8 by co-evaluating their requested findings and the reasoning employed. Supervision of  
9  
10 the correctness of medical facts and the correct diagnostic approach were ultimately  
11  
12 granted by a clinician who could stop the discussion at any point when faulty reasoning  
13  
14 was evident or discussants explicitly requested the facilitation of an experienced  
15  
16 physician. The clinicians' level of involvement into the discussion was left at their own  
17  
18 discretion. We varied the staff between each Live-CCD to minimise effects of personal  
19  
20 teacher characteristics. Live sessions typically lasted 90 minutes and were recorded with  
21  
22 multiple cameras.  
23  
24  
25

26  
27 Students in the Video-CCD format worked on a single-learner multimedia workstation  
28  
29 on which a video recording of the Live-CCD were displayed. These recordings also  
30  
31 contained the electronic slide presentation from the Live-CCD and enabled  
32  
33 simultaneous observation of the discussion from multiple camera angles. Participants  
34  
35 could pause and partially skip the videos.  
36  
37

38  
39 In the Paper-Cases group participants received the case information of each CCD  
40  
41 section sequentially (i.e. admission, discussion, summary) in a print format. In both  
42  
43 single-learner formats students could choose their personal working speed. There was  
44  
45 neither a prespecified minimum nor a maximum time they were required to work on the  
46  
47 cases. In each of the three formats full access to the internet was permitted for additional  
48  
49 information.  
50  
51  
52  
53  
54  
55  
56  
57  
58  
59  
60

## Instruments

Learning outcomes with respect to clinical reasoning were measured with a knowledge application test that consisted of 29 items (i.e. a maximum of 29 points could be achieved) and was to be filled out within 45 minutes. The knowledge application test was based on instruments previously developed at the Institute for Medical Education at LMU Munich.[27-29] It comprised multiple choice items, key feature problems and problem-solving tasks, addressing the conceptual, strategic, and conditional knowledge of the participants (see Figure 3). Meta-analyses on retest effects suggest that score increase is higher for identical forms than for parallel test forms.[30] In order to limit such effects, we applied parallel forms of the knowledge application test for pre- and post-measurements (i.e. topics covered by the individual items were the same, but the items were reformulated and their order was permuted). Overall test difficulty was chosen to be high in order to avoid ceiling effects, as students from all clinical years were allowed to participate in the study. Overall test reliability was satisfactory (Cronbach's  $\alpha = .71$ ).

\*\*\*\*\*

Insert Figure 3 about here

\*\*\*\*\*

Subjective learning outcomes were measured at T<sub>1</sub> with a short questionnaire consisting of 9 items (e.g. "I learned a lot during the CCD course", "The CCD course increased my learning motivation" or "I recommend the implementation of the CCD teaching format into the curriculum"; the full questionnaire is available as a supplementary file). Participants were asked to rate these items on a Likert scale ranging from 1 (I don't agree) to 5 (I fully agree). Reliability of the corresponding scale was good (Cronbach's  $\alpha = .95$ ). Additionally, study participants were asked to share their



views on positive and negative aspects of the respective training format through open items at the end of the questionnaire.

## Statistical Analysis

The required sample size ( $N = 128$ ) was estimated to detect medium effect sizes with a power of 80% and a significance level of  $\alpha = .05$ . For between-group analyses, one-way ANOVAs were conducted with *post-hoc* Bonferroni tests for multiple comparisons.

## Results

### Effects of the CCD format on learning outcomes related to Clinical Reasoning

Experimental groups differed significantly with respect to the knowledge application post-test (see Table 1),  $F(2,87) = 27.07, p = .000$ , partial  $\eta^2 = .384$  (this corresponds to a Cohen's  $d$  of 1.580). The Live-CCD group ( $M = 14.10; SD = 3.32$ ) outperformed both the Video-CCD ( $M = 11.69; SD = 3.34$ ) and the Paper-Cases group ( $M = 8.5; SD = 2.44$ ). Post hoc Bonferroni tests revealed significant differences between Live-CCD and Video-CCD ( $p = .011$ ) as well as the Paper-Cases group ( $p = .000$ ). The difference in the knowledge application post-test between Video-CCD and the Paper-Cases group was also significant ( $p = .000$ ).

Two weeks after course completion, the effect of the teaching format was still found in a delayed knowledge application post-test,  $F(2,87) = 30.91, p = .000$ , partial  $\eta^2 = .415$  (this corresponds to a Cohen's  $d$  of 1.685). Both Live-CCD ( $M = 13.36; SD = 3.23$ ) and the Video-CCD ( $M = 11.84; SD = 2.92$ ) outperformed the Paper-Cases group ( $M = 7.89; SD = 2.41$ ). Post hoc Bonferroni tests revealed significant differences between the Live-CCD and Paper-Cases group ( $p = .000$ ) as well as between the Video-CCD and Paper-

Cases group ( $p = .000$ ). However, the difference between Live-CCD and Video-CCD was not significant in the delayed knowledge application post-test ( $p = .146$ ).

Table 1. Overview of the findings of the study.

|                                         | Teaching format |        |           |        |             |        |
|-----------------------------------------|-----------------|--------|-----------|--------|-------------|--------|
|                                         | Live-CCD        |        | Video-CCD |        | Paper-Cases |        |
|                                         | M               | (SD)   | M         | (SD)   | M           | (SD)   |
| Knowledge application pre-test          | 5.34            | (1.92) | 4.76      | (1.90) | 5.76        | (2.24) |
|                                         | $n = 30$        |        | $n = 27$  |        | $n = 33$    |        |
| Knowledge application post-test         | 14.10           | (3.32) | 11.69     | (3.34) | 8.50        | (2.44) |
|                                         | $n = 30$        |        | $n = 27$  |        | $n = 33$    |        |
| Delayed knowledge application post-test | 13.36           | (3.23) | 11.84     | (2.92) | 7.89        | (2.41) |
|                                         | $n = 30$        |        | $n = 27$  |        | $n = 33$    |        |
| Subjective learning outcomes            | 4.20            | (.63)  | 3.18      | (1.24) | 3.00        | (.99)  |
|                                         | $n = 30$        |        | $n = 27$  |        | $n = 31$    |        |

### Effects of the CCD format on subjective learning outcomes

Experimental groups differed significantly with respect to subjective learning outcomes (see Table 1),  $F(2,85) = 13.16$ ,  $p = .000$ , partial  $\eta^2 = .236$  (this corresponds to a Cohen's  $d$  of 1.112). Participants of the Live-CCD group ( $M = 4.20$ ;  $SD = .63$ ) assigned better ratings to their course format than participants in the Video-CCD group ( $M = 3.18$ ;  $SD = 1.24$ ) and the Paper-Cases group ( $M = 3.0$ ;  $SD = .99$ ). Post hoc Bonferroni tests showed that the Live-CCD differed from the Video-CCD ( $p = .001$ ) and the Paper-Cases group ( $p = .000$ ) in this regard. An additional Duncan post-hoc test confirmed that the Video-CCD and the Paper-Cases group did not differ from each other in this regard ( $p = .48$ ).

1  
2  
3  
4 To investigate the relations between the subjective assessment and the knowledge  
5 application tests applied at the end and two weeks after the course, we calculated  
6 correlations between the different outcome measures. Subjective learning outcomes  
7 correlated on a medium level with both the knowledge application post-test ( $r = .343$ ,  $n$   
8 = 88,  $p = .001$ ) and the delayed knowledge application post-test ( $r = .339$ ,  $n = 88$ ,  $p =$   
9 .001).  
10  
11  
12  
13  
14  
15  
16  
17

18 In the Live-CCD group, 83% of the students were in favour of implementing routine  
19 Live-CCD into the medical curriculum. Only 45% and 31% of students from the Video-  
20 CCD and Paper-Cases groups voted for an implementation of their respective course in  
21 the curriculum. With respect to the open items from the subjective learning outcomes  
22 questionnaire, participants from all groups praised the quality of the cases. Participants  
23 from the Live-CCD group particularly valued their course format for providing an  
24 opportunity to practice “diagnostic thinking” and the “focus on practice elements”. They  
25 also mentioned that “you can look up theoretical knowledge, but you can’t look up  
26 applied knowledge”. Students in the Video-CCD group, on the other hand, praised  
27 features of the digital learning environment as they could “pause, reflect, or quickly do a  
28 Google search” when watching the case discussions. However, they also criticised it  
29 was not possible for them to “participate in a more active way”.  
30  
31  
32  
33  
34  
35  
36  
37  
38  
39  
40  
41  
42  
43  
44  
45  
46  
47

## 48 **Discussion**

49  
50  
51 This randomised controlled study shows that even relatively short CCD interventions  
52 can lead to improved and sustainable learning outcomes with respect to clinical  
53 reasoning. This provides evidence that the CCD approach, which is based on  
54 Clinicopathological Conferences, is an effective teaching resource to foster clinical  
55  
56  
57  
58  
59  
60

1  
2  
3  
4 reasoning skills in medical students. We had hypothesised that a more interactive course  
5  
6 format would result in an improvement of clinical reasoning skills when compared with  
7  
8 less interactive formats. Results show that the Live-CCD indeed leads to the highest  
9  
10 learning outcomes in medical students compared to less interactive formats. Consistent  
11  
12 with our hypothesis, clinical reasoning skills, as measured with our knowledge  
13  
14 application test, had the highest gain in the Live-CCD group. These positive effects of  
15  
16 the CCD teaching format on clinical reasoning skills proved sustainable as shown by the  
17  
18 results in the delayed knowledge application post-test. Overall, these results are in line  
19  
20 with a recently published study on diagnostic reasoning[31] where students who worked  
21  
22 in pairs were more accurate in their diagnosis than individual students despite having  
23  
24 comparable knowledge. Collaborative clinical reasoning has thus far been  
25  
26 underrepresented in the literature, yet seems to solve many of the educational problems  
27  
28 regarding diagnostic errors.[32]

29  
30  
31  
32  
33  
34 The significant difference between the Live-CCD and the Video-CCD group can be  
35  
36 explained by the findings of a meta-analysis that showed technology-assisted single-  
37  
38 person learning to be inferior to group learning because of the decreased social  
39  
40 interaction.[33] However, it is important to note that two weeks after the course,  
41  
42 participants of the Live-CCD and Video-CCD groups did not differ significantly  
43  
44 anymore while both groups still clearly outperformed the Paper-Case group. In other  
45  
46 words, watching a video of the live case discussion was found to be more beneficial for  
47  
48 learners regarding their clinical reasoning skills than just reading the printed cases. We  
49  
50 cannot rule out that Live-CCD and Video-CCD groups did not differ in the delayed  
51  
52 knowledge application post-test due to underpowering of the study. As our trial was not  
53  
54 designed to detect smaller effect sizes, this finding has to be treated with caution.  
55  
56  
57  
58  
59  
60

1  
2  
3  
4 Subjective learning outcomes suggest that students prefer the live discussion over the  
5  
6 other formats and were linked to their performance in the knowledge application test.  
7  
8 Additional qualitative data from the open item answers suggests that the Live-CCD  
9  
10 format supported students in performing clinical reasoning and that the active  
11  
12 discussion of cases was particularly valued by the students.  
13  
14  
15  
16  
17

### 18 **Generalisability**

19  
20 The conclusions of this study are applicable to a broader audience of medical students.  
21  
22 The CCD approach and its respective formats can easily be implemented in routine  
23  
24 medical education. Peer teaching courses hold the promise of being more easy to install  
25  
26 and more easy to staff than courses led by faculty. Of course, live CCDs still come with  
27  
28 certain personnel requirements, as faculty as well as a moderator need to be present.  
29  
30 Special preparation is not necessary for the clinician though, so total time requirements  
31  
32 might still be lower compared to other teaching formats. Likewise, the implementation  
33  
34 of a singular two-day training for moderators should not require extensive resources.  
35  
36 The study population consisting of students with heterogeneous levels of clinical  
37  
38 experience implies that the CCD is an effective teaching format not only for students at  
39  
40 the beginning of their clinical career but also for intermediate students. On the other  
41  
42 hand, generalisability is potentially limited as only students from one medical school  
43  
44 participated in our study.  
45  
46  
47  
48  
49  
50  
51

### 52 **Limitations of the study**

53  
54 There are certain limitations of this study that have to be addressed: One important  
55  
56 limitation is the single-centre nature of this study and the relatively small sample size.  
57  
58  
59  
60

1  
2  
3  
4 Before the CCD approach can be implemented on a larger scale, a validation of our  
5 findings is therefore required. Caution is clearly warranted with the effect sizes shown  
6 in this trial, as it has been shown that effect sizes of learning intervention trials tend to  
7 be inflated compared to the effectiveness of the intervention when used in routine  
8 education.[34] Since we did not limit the time students had to work on the cases, we  
9 cannot entirely rule out that less time was spent on task in the single-learner formats and  
10 particularly the Paper-Cases group. Against this backdrop, we suggest replication to  
11 further validate the results found in this study and strengthen the outlined implications.  
12 Finally, the knowledge application test utilized in this study did not allow for a more in-  
13 depth analysis of clinical reasoning skills (i.e. a distinction of conceptual, strategic, and  
14 conditional knowledge). Larger item numbers could facilitate a reliable assessment of  
15 changes on the level of corresponding subscales.  
16  
17  
18  
19  
20  
21  
22  
23  
24  
25  
26  
27  
28  
29  
30  
31  
32  
33

### 34 **Implications for policy makers / Future research questions**

35  
36 Based on our findings, the CCD approach is a useful asset for medical educators to  
37 widen the range of clinical reasoning teaching tools. Live-CCD can thus be seen as a  
38 prime candidate for routine implementation in clinical reasoning curricula. Future  
39 research should aim to identify which Live-CCD elements (the roles, case contents, or  
40 the course structure) contribute in which way to the improvement of clinical reasoning  
41 skills in medical students. The question if and to what extent such skills are applicable  
42 across domains is currently being discussed.[35] Future studies may also address the  
43 issue of transfer (i.e. to what extent can clinical reasoning skills obtained in case-based  
44 training later be applied to different cases?).[36] Regarding the Video-CCD, means of  
45  
46  
47  
48  
49  
50  
51  
52  
53  
54  
55  
56  
57  
58  
59  
60

1  
2  
3  
4 instructional support to increase the effectiveness and interactivity of the video-based  
5  
6 format should be investigated in an attempt to exploit its full potential.  
7  
8  
9  
10  
11  
12

### 13 **Acknowledgements**

14  
15  
16 The authors thank Johanna Huber and her team for technical support with the  
17  
18 evaluation, Thomas Brendel and Thomas Bischoff for help with the video production  
19  
20 and Mark S. Pecker for critical reading of our manuscript and valuable suggestions. The  
21  
22 authors also thank the CCD student discussants and moderators for their contributions.  
23  
24 We wish to sincerely address our gratitude to the CCD team for organisational support  
25  
26 with the study: Nora Koenemann, Simone Reichert, Sandra Petrenz, Fabian Haak,  
27  
28 Bjoern Stolte, Simon Berhe, Bastian Brandt, and Thomas Lautz. Marc Weidenbusch  
29  
30 wishes to express special thanks to Bernd Gansbacher for introduction to CCDs.  
31  
32  
33  
34  
35  
36  
37  
38

### 39 **Funding statement**

40 This work was supported by the German Federal Ministry of Education and Research  
41  
42 (grant no. 01PL12016) and an intramural grant of the Medical Faculty of the University  
43  
44 of Munich (Lehre@LMU).  
45  
46  
47  
48

### 49 **Competing Interests**

50  
51 Marc Weidenbusch declares to have no conflict of interest.

52  
53 Benedikt Lenzer declares to have no conflict of interest.

54  
55 Maximilian Sailer declares to have no conflict of interest.

56  
57 Christian Strobel declares to have no conflict of interest.  
58  
59  
60

1  
2  
3  
4 Raphael Kunisch declares to have no conflict of interest.

5  
6 Jan Kiesewetter declares to have no conflict of interest.

7  
8  
9 Martin R. Fischer declares to have no conflict of interest.

10  
11 Jan M. Zottmann declares to have no conflict of interest.

## 12 13 14 15 16 **Author contributions**

17  
18 MW, BL, MF and JZ planned the study.

19  
20 MW, BL and CS were responsible for data acquisition.

21  
22 MW, BL, RK, JK, JZ and MS analysed and interpreted the data.

23  
24  
25 MW, BL and JZ drafted and revised the manuscript, all authors contributed significant  
26  
27 intellectual content and all authors gave final approval of the version to be published.  
28  
29

## 30 31 32 **Data sharing statement**

33  
34 Dataset and detailed information about the CCD formats is available upon request.  
35  
36  
37  
38

## 39 40 **References**

- 41  
42 1. Frank JR, Snell LS, Cate OT, Holmboe ES, Carraccio C, Swing SR, et al.  
43  
44 Competency-based medical education: Theory to practice. *Medical Teacher*.  
45  
46 2010;32(8):638-45.  
47  
48 2. Fischer MR, Bauer D, Mohn K, et al. Finally finished! National Competence  
49  
50 Based Catalogues of Learning Objectives for Undergraduate Medical Education  
51  
52 (NKLM) and Dental Education (NKLZ) ready for trial. *GMS Journal for Medical*  
53  
54 Education. 2015;32(3):Doc35.  
55  
56  
57  
58  
59  
60



- 1  
2  
3  
4 3. Harasym PH, Tsai TC, Hemmati P. Current trends in developing medical  
5 students' critical thinking abilities. *The Kaohsiung Journal of Medical Sciences*.  
6  
7 2008;24(7):341-55.  
8
- 9  
10  
11 4. Donaldson MS, Corrigan JM, Kohn LT. *To err is human: Building a safer health*  
12 *system*. Washington: National Academies Press; 2000.  
13
- 14  
15  
16 5. Kassirer JP. Teaching clinical medicine by iterative hypothesis testing: let's  
17 preach what we practice. *New England Journal of Medicine*. 1983;309(15):921-3.  
18
- 19  
20  
21 6. Hege I, Ropp V, Adler M, Radon K, Mäsch G, Lyon H, et al. Experiences with  
22 different integration strategies of case-based e-learning. *Medical Teacher*.  
23  
24 2007;29(8):791-7.  
25
- 26  
27  
28 7. Cannon WB. *The Case Method of Teaching Systematic Medicine*. The Boston  
29 *Medical and Surgical Journal*. 1900;142(2):31-6.  
30
- 31  
32  
33 8. Eva KW. What every teacher needs to know about clinical reasoning. *Medical*  
34 *Education*. 2005;39(1):98-106.  
35
- 36  
37  
38 9. Harris NL. Case records of the Massachusetts General Hospital – Continuing to  
39 learn from the patient. *New England Journal of Medicine*. 2003;348(22):2252-4.  
40
- 41  
42  
43 10. Cabot RC. *Case teaching in medicine: A series of graduated exercises in the*  
44 *differential diagnosis, prognosis and treatment of actual cases of disease*. Boston: Heath;  
45  
46 1906.  
47
- 48  
49  
50 11. Sturdy S. *Knowing Cases: Biomedicine in Edinburgh, 1887-1920*. *Social Studies*  
51 *of Science*. 2007;37(5):659-89.  
52
- 53  
54  
55 12. Relman AS. Two Views. *New England Journal of Medicine*.  
56  
57  
58  
59  
60 1979;301(20):1112-3.

- 1  
2  
3  
4 13. Ertmer PA, Newby TJ. Behaviorism, cognitivism, constructivism: Comparing  
5 critical features from an instructional design perspective. *Performance Improvement*  
6  
7  
8  
9  
10  
11  
12  
13  
14  
15  
16  
17  
18  
19  
20  
21  
22  
23  
24  
25  
26  
27  
28  
29  
30  
31  
32  
33  
34  
35  
36  
37  
38  
39  
40  
41  
42  
43  
44  
45  
46  
47  
48  
49  
50  
51  
52  
53  
54  
55  
56  
57  
58  
59  
60
14. Merseth KK. Cases and case methods in teacher education. In: Sikula J, Buttery TJ, Guyton R, editors. *Handbook of research on teacher education*. 2nd ed. New York, NY: Macmillan; 1996. p. 722-744.
15. Zottmann JM, Stegmann K, Strijbos J-W, Vogel F, Wecker C, Fischer F. Computer-supported collaborative learning with digital video cases in teacher education: The impact of teaching experience on knowledge convergence. *Computers in Human Behavior*. 2013;29(5):2100-8.
16. Powers BW, Navathe AS, Jain SH. Medical education's authenticity problem. *BMJ*. 2014;348:g2651.
17. Chi MTH, Wylie R. The ICAP framework: Linking cognitive engagement to active learning outcomes. *Educational Psychologist*. 2014;49(4):219-43.
18. Duncan RG, Rivet AE. Science learning progressions. *Science*. 2013;339(6118):396-7.
19. De Menezes S, Premnath D. Near-peer education: A novel teaching program. *International journal of medical education*. 2016;7:160-167.
20. Ince-Cushman D, Rudkin T, Rosenberg E. Supervised near-peer clinical teaching in the ambulatory clinic: an exploratory study of family medicine residents' perspectives. *Perspectives on medical education*. 2015;4(1):8-13.
21. Chi MTH. Active-constructive-interactive: A conceptual framework for differentiating learning activities. *Topics in Cognitive Science*. 2009;1(1):73-105.

- 1  
2  
3  
4 22. Ruiz JG, Mintzer MJ, Leipzig RM. The impact of e-learning in medical  
5 education. *Academic Medicine*. 2006;81(3):207-12.  
6  
7  
8  
9 23. Miller DC, Salkind NJ, editors. *Handbook of Research Design & Social*  
10 *Measurement*. Thousand Oaks, CA: SAGE; 2002.  
11  
12  
13 24. Kotton DN, Muse VV, Nishino M. Case 2-2012. *New England Journal of*  
14 *Medicine*. 2012;366(3):259-69.  
15  
16  
17 25. Marks PW, Zukerberg LR. Case 30-2004. *New England Journal of Medicine*.  
18 2004;351(13):1333-41.  
19  
20  
21 26. Uyeki TM, Sharma A, Branda JA. Case 40-2009. *New England Journal of*  
22 *Medicine*. 2009;361(26):2558-69.  
23  
24  
25 27. Braun LT, Zottmann JM, Adolf C, Lottspeich C, Then C, Wirth S, et al.  
26 *Representation scaffolds improve diagnostic efficiency in medical students*. *Medical*  
27 *Education*. 2017; 51(11):1118-1126.  
28  
29  
30 28. Kopp V, Stark R, Kühne-Eversmann L, Fischer MR. Do worked examples foster  
31 *medical students' diagnostic knowledge of hyperthyroidism?* *Medical Education*.  
32 2009;43(12):1210-7  
33  
34  
35 29. Schmidmaier R, Eiber S, Ebersbach R, Schiller M, Hege I, Holzer M, et al.  
36 *Learning the facts in medical school is not enough: Which factors predict successful*  
37 *application of procedural knowledge in a laboratory setting?* *BMC Medical Education*.  
38 2013;13:28.  
39  
40  
41 30. Hausknecht JP, Halbert JA, Di Paolo NT, Moriarty Gerrard MO. Retesting  
42 *in selection: A meta-analysis of coaching and practice effects for tests of cognitive*  
43 *ability*. *Journal of Applied Psychology*. 2007;92(2):373–385.  
44  
45  
46  
47  
48  
49  
50  
51  
52  
53  
54  
55  
56  
57  
58  
59  
60

- 1  
2  
3  
4 31. Hautz WE, Kämmer JE, Schaubert SK, Spies CD, Gaissmaier W. Diagnostic  
5 performance by medical students working individually or in teams. JAMA.  
6  
7 2015;313(3):303-4.  
8  
9  
10  
11 32. Schmidt HG, Mamede S. How to improve the teaching of clinical reasoning: a  
12 narrative review and a proposal. Medical Education. 2015;49(10):961-73.  
13  
14  
15 33. Lou Y, Abrami PC, d'Apollonia S. Small group and individual learning with  
16 technology: A meta-analysis. Review of Educational Research. 2001;71(3):449-521.  
17  
18  
19 34. Springer L, Stanne ME, Donovan SS. Effects of small-group learning on  
20 undergraduates in science, mathematics, engineering, and technology: A meta-analysis.  
21 Review of Educational Research. 1999;69(1):21-51.  
22  
23  
24  
25 35. Fischer F, Chinn C, Engelmann K, Osborne J, editors. Scientific reasoning and  
26 argumentation. The roles of general and specific knowledge. New York, NY:  
27 Routledge; 2018.  
28  
29  
30  
31  
32  
33 36. Keemink Y, Custers E, van Dijk S, ten Cate O. Illness script development in pre-  
34 clinical education through case-based clinical reasoning training International Journal of  
35 Medical Education. 2018;9:35-41.  
36  
37  
38  
39  
40  
41  
42  
43  
44  
45  
46  
47  
48  
49  
50  
51  
52  
53  
54  
55  
56  
57  
58  
59  
60

## Figure legends

*Figure 1: Study design.* Full data sets of 90 medical students were analysed. T\_0: knowledge application pre-test, T\_1: knowledge application post-test, T\_2: delayed knowledge application post-test.

*Figure 2: Live-CCD Structure.* CCD sessions are divided into three parts: In the *admission* part the presenting student shows the discussants his prepared slides (based on the original NEJM-case record), after which the group has to agree on an assessment of the patient under discussion. In the interactive *discussion* part the students prioritise the medical problems, link them to possible etiologies and order tests to further corroborate or discard differential diagnoses. After all the tests that were performed in the case record, the discussants order the putative diagnostic test. The result is disclosed along with the pathological discussion and “take home messages” on important differentials in the third part of the session. CC chief complaint, HPI history of present illness, PMH past medical history, Meds medications, SH social history, FH family history, ROS review of systems, VS vital signs, PE physical examination, CMP comprehensive metabolic panel, CBC complete blood count, PT prothrombin time, PTT partial thromboplastin time, UA urine analysis, ECG electrocardiogram, CXR chest radiograph.

*Figure 3: Knowledge application test.* Exemplary items are shown for each of the knowledge types addressed (arrows point to the correct answers). The test included 11 items on conceptual knowledge, 9 items on strategic knowledge, and 9 items on conditional knowledge.

1  
2  
3  
4  
5  
6  
7  
8  
9  
10  
11  
12  
13  
14  
15  
16  
17  
18  
19  
20  
21  
22  
23  
24  
25  
26  
27  
28  
29  
30  
31  
32  
33  
34  
35  
36  
37  
38  
39  
40  
41  
42  
43  
44  
45  
46  
47  
48  
49  
50  
51  
52  
53  
54  
55  
56  
57  
58  
59  
60

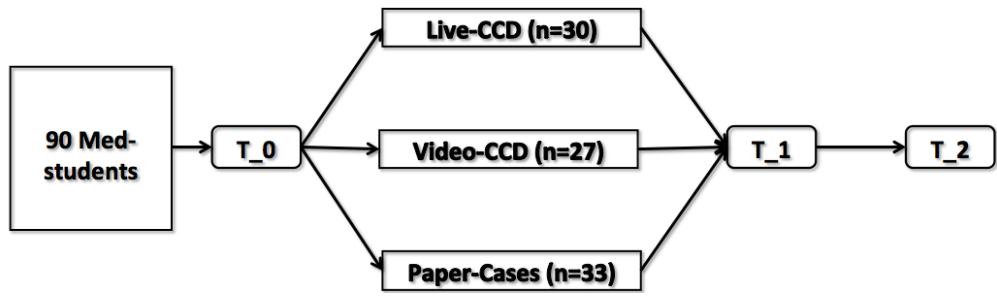

Figure 1: Study design. Full data sets of 90 medical students were analysed. T\_0: knowledge application pre-test, T\_1: knowledge application post-test, T\_2: delayed knowledge application post-test.

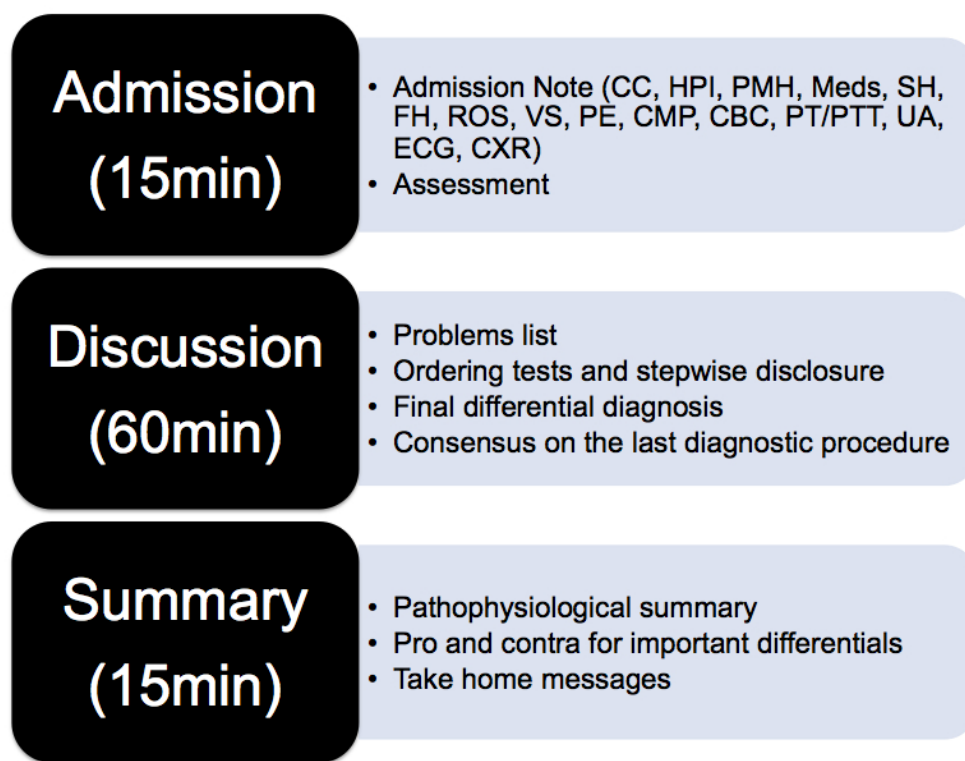

Figure 2: Live-CCD Structure. CCD sessions are divided into three parts: In the admission part the presenting student shows the discussants his prepared slides (based on the original NEJM-case record), after which the group has to agree on an assessment of the patient under discussion. In the interactive discussion part the students prioritise the medical problems, link them to possible etiologies and order tests to further corroborate or discard differential diagnoses. After all the tests that were performed in the case record, the discussants order the putative diagnostic test. The result is disclosed along with the pathological discussion and "take home messages" on important differentials in the third part of the session. CC chief complaint, HPI history of present illness, PMH past medical history, Meds medications, SH social history, FH family history, ROS review of systems, VS vital signs, PE physical examination, CMP comprehensive metabolic panel, CBC complete blood count, PT prothrombin time, PTT partial thromboplastin time, UA urine analysis, ECG electrocardiogram, CXR chest radiograph.

### Conceptual knowledge

- What of the following medications is a neuraminidase inhibitor?  
Amantadin / Ledipasvir / Tenofovir / Dolutegravir / ➡ **Zanamivir**

### Strategic knowledge

A 54 year old woman is brought into your emergency department by EMS with cough, fever and dyspnea. History taking is almost impossible because the patient is somnolent. Her vital signs are: T 39,2 °C, BP 120/80 mmHG, HF 90 bpm, AF 30/min, SpO<sub>2</sub> 83% on ambient air, raising to 87% with 15l O<sub>2</sub>/min on a non-rebreather mask. PE: diffuse crackles over both lungs, peripheral cyanosis.

- What is the most pressing diagnostic or therapeutic measure?  
➡ **Intubation**

### Conditional knowledge

A 42 year old women presents with a body weight of 35 kg and a BMI of 19,2. The patient tells you while weight loss was intentional in the beginning, it has now by far exceeded the desired extent. Lab values show macrocytic anemia and thrombocytopenia along with an eosinophilia of 800/μl. You suspect an infection with the fish tape worm *Diphyllobothrium latum*.

- Please elaborate what processes might underly the weight loss and the bicytopenia.  
➡ **Tape worm infection causes vitamin B12 deficiency-induced bicytopenia and malnutrition because of biological competition for enteral resorption of vitamins and nutrients**

Figure 3: Knowledge application test. Exemplary items are shown for each of the knowledge types addressed (arrows point to the correct answers). The test included 11 items on conceptual knowledge, 9 items on strategic knowledge, and 9 items on conditional knowledge.

154x138mm (600 x 600 DPI)



## Supplemental

*Baseline data: Demographic characteristics of the study participants.*

|                           | CCD format    |        |               |        |               |        |               |        |
|---------------------------|---------------|--------|---------------|--------|---------------|--------|---------------|--------|
|                           | Live-CCD      |        | Video-CCD     |        | Paper-Cases   |        | All formats   |        |
|                           | <i>n</i> = 30 |        | <i>n</i> = 27 |        | <i>n</i> = 33 |        | <i>N</i> = 90 |        |
| Gender distribution       | 14/16         |        | 5/22          |        | 12/21         |        | 31/59         |        |
| <i>N</i> m/f              |               |        |               |        |               |        |               |        |
| (% f)                     | (53.3% f)     |        | (81.5% f)     |        | (63.6% f)     |        | (65.6% f)     |        |
|                           | M             | (SD)   | M             | (SD)   | M             | (SD)   | M             | (SD)   |
| Age                       | 23.77         | (4.09) | 22.26         | (1.77) | 22.91         | (2.40) | 23.0          | (2.97) |
| Clinical semester         | 3.23          | (1.96) | 3.41          | (1.47) | 3.82          | (1.84) | 3.50          | (1.78) |
| High school grade         | 1.53          | (0.36) | 1.35          | (0.42) | 1.48          | (0.68) | 1.46          | (0.52) |
| First National Board Exam | 245           |        | 226           |        | 246           |        | 240           |        |
| Score                     | (30)          |        | (78)          |        | (30)          |        | (49)          |        |
| Participants with prior   | 6             |        | 6             |        | 5             |        | 17            |        |
| CCD experience            | (20.0%)       |        | (22.2%)       |        | (15.1%)       |        | (18.9%)       |        |
| n (%)                     |               |        |               |        |               |        |               |        |

1  
2  
3 *Questionnaire items (5-point Likert scale) for the assessment of subjective learning outcomes.*  
4  
5

- 6 1. I perceived this CCD format as meaningful.
  - 7 2. I learned a lot during the CCD course.
  - 8 3. The CCD course increased my learning motivation.
  - 9 4. I would like to participate in this CCD format again in the future.
  - 10 5. I enjoyed the CCD course.
  - 11 6. This CCD format should be offered as part of the curriculum.
  - 12 7. I was able to follow the case discussions.
  - 13 8. Learning in the CCD format is easier for me than learning in traditional lectures or seminars.
  - 14 9. How would you rate the course overall?
- 15  
16  
17  
18  
19  
20  
21  
22  
23  
24  
25  
26  
27  
28  
29  
30  
31  
32  
33  
34  
35  
36  
37  
38  
39  
40  
41  
42  
43  
44  
45  
46

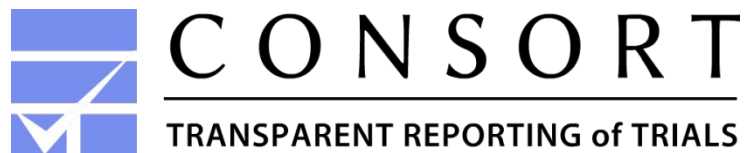

**CONSORT 2010 Flow Diagram**

1  
2  
3  
4  
5  
6  
7  
8  
9  
10  
11  
12  
13  
14  
15  
16  
17  
18  
19  
20  
21  
22  
23  
24  
25  
26  
27  
28  
29  
30  
31  
32  
33  
34  
35  
36  
37  
38  
39  
40  
41  
42  
43  
44  
45  
46  
47

**Enrollment**

Assessed for eligibility (n=106)

Excluded (n=0)  
 ♦ Not meeting inclusion criteria (n=0)  
 ♦ Declined to participate (n=0)  
 ♦ Other reasons (n=0)

Randomised (n=106)

**Allocation**

Allocated to Live-CCD (n=35)  
 ♦ Received allocated intervention (n=35)  
 ♦ Did not receive allocated intervention (n=0)

Allocated to Video-CCD (n=34)  
 ♦ Received allocated intervention (n=34)  
 ♦ Did not receive allocated intervention (n=0)

Allocated to Paper-Cases (n=37)  
 ♦ Received allocated intervention (n=37)  
 ♦ Did not receive allocated intervention (n=0)

**Follow-Up**

Lost to follow-up/discontinued intervention (reasons not known) (n=5)

Lost to follow-up/discontinued intervention (reasons not known) (n=7)

Lost to follow-up/discontinued intervention (reasons not known) (n=4)

**Analysis**

Analysed (n=30)  
 ♦ Excluded from analysis because of incomplete datasets (n=5)

Analysed (n=27)  
 ♦ Excluded from analysis because of incomplete datasets (n=7)

Analysed (n=33)  
 ♦ Excluded from analysis because of incomplete datasets (n=4)

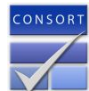

## CONSORT 2010 checklist of information to include when reporting a randomised trial\*

| Section/Topic                    | Item No | Checklist item                                                                                                                                                                              | Reported on page No |
|----------------------------------|---------|---------------------------------------------------------------------------------------------------------------------------------------------------------------------------------------------|---------------------|
| <b>Title and abstract</b>        |         |                                                                                                                                                                                             |                     |
|                                  | 1a      | Identification as a randomised trial in the title                                                                                                                                           | 1                   |
|                                  | 1b      | Structured summary of trial design, methods, results, and conclusions (for specific guidance see CONSORT for abstracts)                                                                     | 2-3                 |
| <b>Introduction</b>              |         |                                                                                                                                                                                             |                     |
| Background and objectives        | 2a      | Scientific background and explanation of rationale                                                                                                                                          | 4-7                 |
|                                  | 2b      | Specific objectives or hypotheses                                                                                                                                                           | 6-7                 |
| <b>Methods</b>                   |         |                                                                                                                                                                                             |                     |
| Trial design                     | 3a      | Description of trial design (such as parallel, factorial) including allocation ratio                                                                                                        | 8                   |
|                                  | 3b      | Important changes to methods after trial commencement (such as eligibility criteria), with reasons                                                                                          | not applicable      |
| Participants                     | 4a      | Eligibility criteria for participants                                                                                                                                                       | 7                   |
|                                  | 4b      | Settings and locations where the data were collected                                                                                                                                        | 7                   |
| Interventions                    | 5       | The interventions for each group with sufficient details to allow replication, including how and when they were actually administered                                                       | 8-10                |
| Outcomes                         | 6a      | Completely defined pre-specified primary and secondary outcome measures, including how and when they were assessed                                                                          | 8, 11-12            |
|                                  | 6b      | Any changes to trial outcomes after the trial commenced, with reasons                                                                                                                       | not applicable      |
| Sample size                      | 7a      | How sample size was determined                                                                                                                                                              | 12                  |
|                                  | 7b      | When applicable, explanation of any interim analyses and stopping guidelines                                                                                                                | not applicable      |
| <b>Randomisation:</b>            |         |                                                                                                                                                                                             |                     |
| Sequence generation              | 8a      | Method used to generate the random allocation sequence                                                                                                                                      | 7                   |
|                                  | 8b      | Type of randomisation; details of any restriction (such as blocking and block size)                                                                                                         | 7                   |
| Allocation concealment mechanism | 9       | Mechanism used to implement the random allocation sequence (such as sequentially numbered containers), describing any steps taken to conceal the sequence until interventions were assigned | not applicable      |
| Implementation                   | 10      | Who generated the random allocation sequence, who enrolled participants, and who assigned participants to interventions                                                                     | not applicable      |
| Blinding                         | 11a     | If done, who was blinded after assignment to interventions (for example, participants, care providers, those                                                                                | not applicable      |

|                                                      |     |                                                                                                                                                   |                          |
|------------------------------------------------------|-----|---------------------------------------------------------------------------------------------------------------------------------------------------|--------------------------|
|                                                      |     | assessing outcomes) and how                                                                                                                       |                          |
|                                                      | 11b | If relevant, description of the similarity of interventions                                                                                       | not applicable           |
| Statistical methods                                  | 12a | Statistical methods used to compare groups for primary and secondary outcomes                                                                     | 12                       |
|                                                      | 12b | Methods for additional analyses, such as subgroup analyses and adjusted analyses                                                                  | 12                       |
| <b>Results</b>                                       |     |                                                                                                                                                   |                          |
| Participant flow (a diagram is strongly recommended) | 13a | For each group, the numbers of participants who were randomly assigned, received intended treatment, and were analysed for the primary outcome    | attached as supplemental |
|                                                      | 13b | For each group, losses and exclusions after randomisation, together with reasons                                                                  | 7                        |
| Recruitment                                          | 14a | Dates defining the periods of recruitment and follow-up                                                                                           | not applicable           |
|                                                      | 14b | Why the trial ended or was stopped                                                                                                                | not applicable           |
| Baseline data                                        | 15  | A table showing baseline demographic and clinical characteristics for each group                                                                  | attached as supplemental |
| Numbers analysed                                     | 16  | For each group, number of participants (denominator) included in each analysis and whether the analysis was by original assigned groups           | 13                       |
| Outcomes and estimation                              | 17a | For each primary and secondary outcome, results for each group, and the estimated effect size and its precision (such as 95% confidence interval) | 12-14                    |
|                                                      | 17b | For binary outcomes, presentation of both absolute and relative effect sizes is recommended                                                       | not applicable           |
| Ancillary analyses                                   | 18  | Results of any other analyses performed, including subgroup analyses and adjusted analyses, distinguishing pre-specified from exploratory         | not applicable           |
| Harms                                                | 19  | All important harms or unintended effects in each group (for specific guidance see CONSORT for harms)                                             | not applicable           |
| <b>Discussion</b>                                    |     |                                                                                                                                                   |                          |
| Limitations                                          | 20  | Trial limitations, addressing sources of potential bias, imprecision, and, if relevant, multiplicity of analyses                                  | 16-17                    |
| Generalisability                                     | 21  | Generalisability (external validity, applicability) of the trial findings                                                                         | 16                       |
| Interpretation                                       | 22  | Interpretation consistent with results, balancing benefits and harms, and considering other relevant evidence                                     | 14-16                    |
| <b>Other information</b>                             |     |                                                                                                                                                   |                          |
| Registration                                         | 23  | Registration number and name of trial registry                                                                                                    | not applicable           |
| Protocol                                             | 24  | Where the full trial protocol can be accessed, if available                                                                                       | 19                       |
| Funding                                              | 25  | Sources of funding and other support (such as supply of drugs), role of funders                                                                   | 18                       |

\*We strongly recommend reading this statement in conjunction with the CONSORT 2010 Explanation and Elaboration for important clarifications on all the items. If relevant, we also recommend reading CONSORT extensions for cluster randomised trials, non-inferiority and equivalence trials, non-pharmacological treatments, herbal interventions, and pragmatic trials. Additional extensions are forthcoming: for those and for up to date references relevant to this checklist, see [www.consort-statement.org](http://www.consort-statement.org).

# BMJ Open

## Can Clinical Case Discussions foster clinical reasoning skills in undergraduate medical education? A randomised controlled trial

|                                 |                                                                                                                                                                                                                                                                                                                                                                                                                                                                                                                                                                                                                                                                                                                                                                        |
|---------------------------------|------------------------------------------------------------------------------------------------------------------------------------------------------------------------------------------------------------------------------------------------------------------------------------------------------------------------------------------------------------------------------------------------------------------------------------------------------------------------------------------------------------------------------------------------------------------------------------------------------------------------------------------------------------------------------------------------------------------------------------------------------------------------|
| Journal:                        | <i>BMJ Open</i>                                                                                                                                                                                                                                                                                                                                                                                                                                                                                                                                                                                                                                                                                                                                                        |
| Manuscript ID                   | bmjopen-2018-025973.R2                                                                                                                                                                                                                                                                                                                                                                                                                                                                                                                                                                                                                                                                                                                                                 |
| Article Type:                   | Research                                                                                                                                                                                                                                                                                                                                                                                                                                                                                                                                                                                                                                                                                                                                                               |
| Date Submitted by the Author:   | 20-Jun-2019                                                                                                                                                                                                                                                                                                                                                                                                                                                                                                                                                                                                                                                                                                                                                            |
| Complete List of Authors:       | Weidenbusch, Marc; University Hospital of LMU Munich, Institute for Medical Education; University Hospital of LMU Munich, Department of Internal Medicine IV<br>Lenzer, Benedikt; University Hospital of LMU Munich, Institute for Medical Education<br>Sailer, Maximilian; LMU Munich, Department of Psychology<br>Strobel, Christian; University Hospital of LMU Munich, Institute for Medical Education<br>Kunisch, Raphael; University Hospital of LMU Munich, Institute for Medical Education<br>Kiesewetter, Jan; University Hospital of LMU Munich, Institute for Medical Education<br>Fischer, Martin; University Hospital of LMU Munich, Institute for Medical Education<br>Zottmann, Jan; University Hospital of LMU Munich, Institute for Medical Education |
| <b>Primary Subject Heading</b>: | Medical education and training                                                                                                                                                                                                                                                                                                                                                                                                                                                                                                                                                                                                                                                                                                                                         |
| Secondary Subject Heading:      | Medical education and training                                                                                                                                                                                                                                                                                                                                                                                                                                                                                                                                                                                                                                                                                                                                         |
| Keywords:                       | Undergraduate medical education, Case-based learning, Clinical reasoning, Social interaction, Medical decision making                                                                                                                                                                                                                                                                                                                                                                                                                                                                                                                                                                                                                                                  |
|                                 |                                                                                                                                                                                                                                                                                                                                                                                                                                                                                                                                                                                                                                                                                                                                                                        |

SCHOLARONE™  
Manuscripts

## RESEARCH PAPER

**Can Clinical Case Discussions foster clinical reasoning skills in  
undergraduate medical education? A randomised controlled trial**

*Dr. med. Marc Weidenbusch<sup>1,2\*</sup>, Benedikt Lenzer<sup>2\*</sup>, Prof. Dr. phil. Maximilian Sailer<sup>3</sup>,  
Dr. phil. Christian Strobel<sup>2</sup>, Raphael Kunisch<sup>2</sup>, Dr. phil. Jan Kiesewetter<sup>2</sup>, Prof. Dr.  
med. Martin R. Fischer<sup>2</sup> & Dr. phil. Jan M. Zottmann<sup>2</sup>*

<sup>1</sup>Nephrologisches Zentrum, Medizinische Klinik und Poliklinik IV, Klinikum der  
Universität München, LMU München

<sup>2</sup>Institut für Didaktik und Ausbildungsforschung in der Medizin, Klinikum der  
Universität München, LMU München

<sup>3</sup>Department Psychologie, LMU München

\*equal contribution

*Corresponding author:*

Dr. phil. Jan M. Zottmann

Institut für Didaktik und Ausbildungsforschung in der Medizin

Klinikum der Universität München, LMU München

Pettenkoferstr. 8a, D-80336 Munich, Germany

Tel: +49 89 4400 57203

Fax: +49 89 4400 57202

E-Mail: [jan.zottmann@med.uni-muenchen.de](mailto:jan.zottmann@med.uni-muenchen.de)

**Word count:** 3645 words

**Keywords:** undergraduate medical education, case-based learning, clinical reasoning,  
social interaction, medical decision making

## Abstract

**Objective:** Fostering clinical reasoning is a mainstay of medical education. Based on the Clinicopathological Conferences, we propose a case-based peer teaching approach called Clinical Case Discussions (CCDs) to promote the respective skills in medical students. This study compares the effectiveness of different CCD formats with varying degrees of social interaction in fostering clinical reasoning.

**Design, Setting, Participants:** A single-center randomised controlled trial with a parallel design was conducted at a German university. The 106 study participants were stratified (age, gender, year of study, prior CCD participation, performance in a pre-test) and tested regarding their clinical reasoning skills right after CCD participation and two weeks later.

**Intervention:** Participants worked either within a live discussion group (Live-CCD), a group watching recordings of the live discussions (Video-CCD), or a group working with printed cases (Paper-Cases). The presentation of case information followed an admission-, discussion-, summary-sequence.

**Primary and secondary outcome measures:** Clinical reasoning skills were measured with a knowledge application test addressing the students' conceptual, strategic, and conditional knowledge. Additionally, subjective learning outcomes were assessed.

**Results:** With respect to learning outcomes, the Live-CCD group displayed the best results, followed by Video-CCD and Paper-Cases. No difference was found between Live-CCD and Video-CCD groups in the delayed post-test; both outperformed the Paper-Cases group. Regarding subjective learning outcomes, the Live-CCD received significantly better ratings than the other formats.



1  
2  
3  
4 **Conclusions:** This study demonstrates that the CCD approach is an effective and  
5 sustainable clinical reasoning teaching resource for medical students. Subjective  
6 learning outcomes underline the importance of learner (inter-)activity in the acquisition  
7 of clinical reasoning skills in the context of case-based learning. Higher efficacy of  
8 more interactive formats can be attributed to positive effects of collaborative learning.  
9 Future research should investigate how the Live-CCD format can further be improved  
10 and how video-based CCDs can be enhanced through instructional support.  
11  
12  
13  
14  
15  
16  
17  
18  
19  
20  
21  
22

## 23 **Article summary**

### 24 **Strengths and limitations of this study:**

- 25 • First empirical study on the implementation of Clinical Case Discussions in  
26 undergraduate medical education.
- 27 • Comparison of Clinical Case Discussions with differing grades of social  
28 interaction to determine their effectiveness on medical students' acquisition of  
29 clinical reasoning skills by between-group analyses.
- 30 • Implementation of multidimensional and multilayered test instruments in a pre-,  
31 post- and delayed post-test design to measure clinical reasoning skills by a  
32 knowledge application test and self-assessment.
- 33 • The knowledge application test utilized in this study did not allow for a more in-  
34 depth analysis of clinical reasoning skills (i.e. a distinction of conceptual,  
35 strategic, and conditional knowledge).
- 36  
37  
38  
39  
40  
41  
42  
43  
44  
45  
46  
47  
48  
49  
50  
51  
52  
53  
54  
55  
56  
57  
58  
59  
60

## Introduction

Curriculum developers face the challenge of implementing competence-oriented frameworks such as CanMEDS (Canada), the NKLM (Germany) or PROFILES (Switzerland), including the need to train clinical reasoning skills as a medical doctor's key competence.[1-3] As such, clinical reasoning skills are crucial not only for appropriate medical decision making, but also to avoid diagnostic errors and the associated harm for both patients and healthcare systems.[4]

Case-based learning has been proposed to foster clinical reasoning skills[5] and is well accepted among students.[6] Case-based learning found an early representation in Clinicopathological Conferences (CPC, first introduced by Cannon in 1900[7]) which are practiced until today. The Clinicopathological Conferences conducted at the Massachusetts General Hospital are published on a regular basis known as the *Case Records* series of the New England Journal of Medicine. In those CPCs the “medical mystery”[8] presented by the case under discussion calls readers to think about the possible diagnosis themselves, before it is finally disclosed at the last part of the CPC. Despite the absence of definitive evidence for efficacy as a teaching method, CPCs have widely been used in medical education since the early 20th century to foster clinical reasoning.[9-11] While these CPC-Case Records reaches lots of medical readers around the world, it has been criticised as being anachronistic with a diagnosing “star (i.e. the discussant), performing, acutely aware of being the center of attention”.[12]

Case-based learning formats are embedded in a context, which is known to promote learning better than providing facts in an abstract, non-contextual form.[13] A definition found in the review by Merseth suggests three essential elements of a case: A case is real (i.e. based on a real-life situation or event); it relies on careful research and study; it

1  
2  
3  
4 is “created explicitly for discussion and seeks to include sufficient detail and  
5  
6 information to elicit active analysis and interpretation by users”.<sup>[14]</sup> Cases may be  
7  
8 represented by means of text, pictures, videos, and the like. Realism and authenticity are  
9  
10 varying features of cases,<sup>[15]</sup> but particularly elaborated and authentic cases provide  
11  
12 increased diagnostic challenge, comprising an additional value for medical training.<sup>[16]</sup>  
13  
14 However, due to their setup, CPCs are often a passive learning situation for participants,  
15  
16 as they listen to the discussant laying out his or her clinical reasoning on the case under  
17  
18 discussion. According to the ICAP framework by Chi et al.,<sup>[17]</sup> teaching formats  
19  
20 increase their efficacy from passive < active < constructive < interactive learning  
21  
22 environments. Learning is enhanced when students interactively engage in discussions  
23  
24 among each other. Accordingly, case-based learning has been found to be particularly  
25  
26 beneficial in collaborative settings.<sup>[15]</sup> However, another important aspect to consider  
27  
28 in collaborative learning environments is that some students may participate passively  
29  
30 while others contribute disproportionately much. To foster optimal learning effects,  
31  
32 students should thus be encouraged to be interactively engaged. One prerequisite to  
33  
34 achieve self-guided learning in groups is a low threshold for students to come forward  
35  
36 with their questions and participate in ensuing discussions.<sup>[18]</sup> To this end, peer  
37  
38 teaching has been established as an effective tool to stimulate discussions.<sup>[19]</sup> To make  
39  
40 sure peer tutors are not overwhelmed in moderating these discussions, the presence of  
41  
42 an experienced clinician appears to be warranted<sup>[20]</sup> in addition to a specific training of  
43  
44 the tutors.  
45  
46  
47  
48  
49  
50  
51

52 Taken together, while traditional CPCs encompass some important dimensions of  
53  
54 effective case-based learning environments, they are not systematically aiming at  
55  
56 constructive or interactive learner activities that are known features of effective teaching  
57  
58  
59  
60

1  
2  
3  
4 formats.[17,21] Therefore, we introduced Clinical Case Discussions (CCD) in  
5  
6 undergraduate medical education to account for these features. We still use the Case  
7  
8 Records of the Massachusetts General Hospital,[9] as these cases exemplify realistic  
9  
10 patient encounters and fulfill the criteria for an interactive collaborative learning process  
11  
12 as explained above. In the CCD approach, cases are typically presented with  
13  
14 information until the admission of the patient to the hospital. This event is usually the  
15  
16 starting point of an interactive discussion phase of the group about possible diagnoses  
17  
18 and diagnostic strategies. After all test results have been discussed, the actual diagnosis  
19  
20 is disclosed and the pitfalls and take-home messages of the case are summarised.  
21  
22

23  
24 To investigate the effectiveness of the CCD approach in undergraduate medical  
25  
26 education, we designed an intervention trial and assessed clinical reasoning skills in  
27  
28 medical students before and after *participating in live CCDs or being exposed to video*  
29  
30 recordings of live CCDs. We compared these formats and its effects on clinical  
31  
32 reasoning with the more traditional approach of working through written cases. When  
33  
34 carrying out this randomised trial, we hypothesised that participation in live CCD  
35  
36 sessions would lead to a higher increase of clinical reasoning skills than simply reading  
37  
38 the cases. To better understand possible effects of the CCD learning environment with  
39  
40 its social components on learning outcomes, participation in live CCDs as outlined  
41  
42 above was additionally compared to the effects of watching videos of CCDs online.  
43  
44 This comparison also seemed relevant from an economic point of view as video-  
45  
46 streaming of lectures and seminars are prevalent at many institutions in higher  
47  
48 education allowing for flexible and scalable access to learning materials.[22] To  
49  
50 investigate the potential of different CCD formats for regular curricular use, we also  
51  
52  
53  
54  
55  
56  
57  
58  
59  
60

1  
2  
3  
4 measured subjective learning outcomes after the intervention and correlated student  
5 self-assessments with objective changes in their clinical reasoning skills.  
6  
7  
8  
9

## 10 11 **Methods**

### 12 13 **Participants / Ethics**

14  
15  
16 Initially, we recruited 106 volunteer medical students at the Medical Faculty of LMU  
17 Munich. Randomisation was performed in a two-step procedure: First, we selected a  
18 sample of roughly 100 enrolled students. Next, we stratified participants by creating  
19 triplets on the basis of the variables age, gender, year of study, prior CCD participation  
20 and performance in a knowledge application pre-test. This was done in an effort to limit  
21 the risk of random misdistribution of the selected sample. From each triplet we  
22 randomly assigned participants to the experimental groups. A total of 90 participants  
23 eventually completed the study, 31 of them were male and 59 female. They were 20 to  
24 41 years old ( $M = 23$ ;  $SD = 2.97$ ) and in their first to eighth clinical semester ( $M = 3.5$ ;  
25  $SD = 1.78$ ).  
26  
27  
28  
29  
30  
31  
32  
33  
34  
35  
36  
37  
38

39 The study was approved by the ethics committee of the Medical Faculty of LMU  
40 Munich (approval reference no. 222-15). Written informed consent was obtained from  
41 all study participants and they received a financial reimbursement of 50 Euros upon  
42 completion of the trial.  
43  
44  
45  
46  
47  
48  
49

### 50 51 **Patient and public involvement**

52  
53 No patients or public were involved in this research.  
54  
55  
56

### 57 58 **Study design**

1  
2  
3  
4 We conducted a single-center randomised controlled trial consisting of a total of five  
5 course sessions with a parallel design (see Figure 1). One week prior to the first CCD  
6 session, participants were introduced to the principles of the CCD approach and the  
7 sequence of this trial in an introductory session where they also took a knowledge  
8 application pre-test (T\_0). In the experimental phase, participants attended three weekly  
9 interventional course sessions of 90 minutes each in one of the three aforementioned  
10 groups with the respective CCD formats. Participants took a knowledge application  
11 post-test at the end of the last experimental course session (T\_1), four weeks after pre-  
12 testing. A delayed knowledge application post-test was conducted two weeks after  
13 completion of the interventional courses (T\_2); we deliberately chose that time interval  
14 to investigate the sustainability of possible effects while balancing the risk of post-  
15 intervention confounding.[23]

16  
17  
18  
19  
20  
21  
22  
23  
24  
25  
26  
27  
28  
29  
30  
31  
32  
33  
34  
35  
36  
37  
38  
39  
40  
41  
42  
43  
44  
45  
46  
47  
48  
49  
50  
51  
52  
53  
54  
55  
56  
57  
58  
59  
60

\*\*\*\*\*

Insert Figure 1 about here

\*\*\*\*\*

## Materials

In all experimental groups the intervention was based on the same three, independent internal medicine cases. Chief complaints in these cases were paresthesia (first session), fever and respiratory failure (second session), and rapidly progressive respiratory failure (third session).[24-26] Cases were worked through in an iterative approach in different formats: (a) peer-moderated live case discussions in an interactive setting (Live-CCD,  $n = 30$ ), (b) a single-learner format utilizing an interactive multimedia platform displaying video recordings of the live case discussions (Video-CCD,  $n = 27$ ), and (c) a single-learner format in which the students worked with the original paper cases of the NEJM

(Paper-Cases,  $n = 33$ ). The cases were prepared in a way that participants in each format were exposed to the same case information.

## Procedure

In all three groups cases were presented in a specified structured manner similar to the original Clinicopathological Conferences (see Figure 2). In each format the students (“discussants”) had to fill out a form after the admission in which the case had to be summarised and a list of clinical problems and working diagnoses had to be provided. Subsequently, between discussion and summary a second case-summary had to be completed in which the final diagnostic test and the most likely diagnosis had to be proposed.

\*\*\*\*\*

Insert Figure 2 about here

\*\*\*\*\*

In the Live-CCD group, the case presentation was prepared beforehand by a voluntary discussant (“presenter”), who presented the facts in the admission (according to the structure shown in Figure 2). Electronic slides and flipcharts were used to transport case information. Original test results were revealed by the presenter during the discussion only when requested by the group of students. Furthermore, the presenter summarised the differential diagnosis, important pathophysiological features of the case at the end of the session and provided a short take home message. The moderating medical students (“moderator”) were recruited among previous CCD participants. They had experience in CCD moderation and had had an introductory training (two days) in higher education methods and group facilitation prior to the study. The moderator facilitated the discussion process and ensured a reasonable approach to the patient encounter (e.g. with

1  
2  
3  
4 respect to timing and hierarchy of ordered tests) in close communication with the  
5  
6 discussants. Moreover, the moderator helped students develop their diagnostic strategy  
7  
8 by co-evaluating their requested findings and the reasoning employed. Supervision of  
9  
10 the correctness of medical facts and the correct diagnostic approach were ultimately  
11  
12 granted by a clinician who could stop the discussion at any point when faulty reasoning  
13  
14 was evident or discussants explicitly requested the facilitation of an experienced  
15  
16 physician. The clinicians' level of involvement into the discussion was left at their own  
17  
18 discretion. We varied the staff between each Live-CCD to minimise effects of personal  
19  
20 teacher characteristics. Live sessions typically lasted 90 minutes and were recorded with  
21  
22 multiple cameras.  
23  
24  
25

26  
27 Students in the Video-CCD format worked on a single-learner multimedia workstation  
28  
29 on which a video recording of the Live-CCD were displayed. These recordings also  
30  
31 contained the electronic slide presentation from the Live-CCD and enabled  
32  
33 simultaneous observation of the discussion from multiple camera angles. Participants  
34  
35 could pause and partially skip the videos.  
36  
37

38  
39 In the Paper-Cases group participants received the case information of each CCD  
40  
41 section sequentially (i.e. admission, discussion, summary) in a print format. In both  
42  
43 single-learner formats students could choose their personal working speed. There was  
44  
45 neither a prespecified minimum nor a maximum time they were required to work on the  
46  
47 cases. In each of the three formats full access to the internet was permitted for additional  
48  
49 information.  
50  
51  
52  
53  
54  
55  
56  
57  
58  
59  
60



## Instruments

Learning outcomes with respect to clinical reasoning were measured with a knowledge application test that consisted of 29 items (i.e. a maximum of 29 points could be achieved) and was to be filled out within 45 minutes. The knowledge application test was based on instruments previously developed at the Institute for Medical Education at LMU Munich.[27-29] It comprised multiple choice items, key feature problems and problem-solving tasks, addressing the conceptual, strategic, and conditional knowledge of the participants (see Figure 3). Meta-analyses on retest effects suggest that score increase is higher for identical forms than for parallel test forms.[30] In order to limit such effects, we applied parallel forms of the knowledge application test for pre- and post-measurements (i.e. topics covered by the individual items were the same, but the items were reformulated and their order was permuted). Overall test difficulty was chosen to be high in order to avoid ceiling effects, as students from all clinical years were allowed to participate in the study. Overall test reliability was satisfactory (Cronbach's  $\alpha = .71$ ).

\*\*\*\*\*

Insert Figure 3 about here

\*\*\*\*\*

Subjective learning outcomes were measured at T<sub>1</sub> with a short questionnaire consisting of 9 items (e.g. "I learned a lot during the CCD course", "The CCD course increased my learning motivation" or "I recommend the implementation of the CCD teaching format into the curriculum"; the full questionnaire is available as a supplementary file). Participants were asked to rate these items on a Likert scale ranging from 1 (I don't agree) to 5 (I fully agree). Reliability of the corresponding scale was good (Cronbach's  $\alpha = .95$ ). Additionally, study participants were asked to share their

views on positive and negative aspects of the respective training format through open items at the end of the questionnaire.

## Statistical Analysis

The required sample size ( $N = 128$ ) was estimated to detect medium effect sizes with a power of 80% and a significance level of  $\alpha = .05$ . For between-group analyses, one-way ANOVAs were conducted with *post-hoc* Bonferroni tests for multiple comparisons.

## Results

### Effects of the CCD format on learning outcomes related to Clinical Reasoning

Experimental groups differed significantly with respect to the knowledge application post-test (see Table 1),  $F(2,87) = 27.07$ ,  $p = .000$ , partial  $\eta^2 = .384$ . The Live-CCD group ( $M = 14.10$ ;  $SD = 3.32$ ) outperformed both the Video-CCD ( $M = 11.69$ ;  $SD = 3.34$ ) and the Paper-Cases group ( $M = 8.5$ ;  $SD = 2.44$ ). Post hoc Bonferroni tests revealed significant differences between Live-CCD and Video-CCD ( $p = .011$ ) as well as the Paper-Cases group ( $p = .000$ ). The difference in the knowledge application post-test between Video-CCD and the Paper-Cases group was also significant ( $p = .000$ ).

Two weeks after course completion, the effect of the teaching format was still found in a delayed knowledge application post-test,  $F(2,87) = 30.91$ ,  $p = .000$ , partial  $\eta^2 = .415$ . Both Live-CCD ( $M = 13.36$ ;  $SD = 3.23$ ) and the Video-CCD ( $M = 11.84$ ;  $SD = 2.92$ ) outperformed the Paper-Cases group ( $M = 7.89$ ;  $SD = 2.41$ ). Post hoc Bonferroni tests revealed significant differences between the Live-CCD and Paper-Cases group ( $p = .000$ ) as well as between the Video-CCD and Paper-Cases group ( $p = .000$ ). However,

the difference between Live-CCD and Video-CCD was not significant in the delayed knowledge application post-test ( $p = .146$ ).

Table 1. Overview of the findings of the study.

|                                         | Teaching format |        |           |        |             |        |
|-----------------------------------------|-----------------|--------|-----------|--------|-------------|--------|
|                                         | Live-CCD        |        | Video-CCD |        | Paper-Cases |        |
|                                         | M               | (SD)   | M         | (SD)   | M           | (SD)   |
| Knowledge application pre-test          | 5.34            | (1.92) | 4.76      | (1.90) | 5.76        | (2.24) |
|                                         | $n = 30$        |        | $n = 27$  |        | $n = 33$    |        |
| Knowledge application post-test         | 14.10           | (3.32) | 11.69     | (3.34) | 8.50        | (2.44) |
|                                         | $n = 30$        |        | $n = 27$  |        | $n = 33$    |        |
| Delayed knowledge application post-test | 13.36           | (3.23) | 11.84     | (2.92) | 7.89        | (2.41) |
|                                         | $n = 30$        |        | $n = 27$  |        | $n = 33$    |        |
| Subjective learning outcomes            | 4.20            | (.63)  | 3.18      | (1.24) | 3.00        | (.99)  |
|                                         | $n = 30$        |        | $n = 27$  |        | $n = 31$    |        |

### Effects of the CCD format on subjective learning outcomes

Experimental groups differed significantly with respect to subjective learning outcomes (see Table 1),  $F(2,85) = 13.16$ ,  $p = .000$ , partial  $\eta^2 = .236$ . Participants of the Live-CCD group ( $M = 4.20$ ;  $SD = .63$ ) assigned better ratings to their course format than participants in the Video-CCD group ( $M = 3.18$ ;  $SD = 1.24$ ) and the Paper-Cases group ( $M = 3.0$ ;  $SD = .99$ ). Post hoc Bonferroni tests showed that the Live-CCD differed from the Video-CCD ( $p = .001$ ) and the Paper-Cases group ( $p = .000$ ) in this regard. An additional Duncan post-hoc test confirmed that the Video-CCD and the Paper-Cases group did not differ from each other in this regard ( $p = .48$ ).

1  
2  
3  
4 To investigate the relations between the subjective assessment and the knowledge  
5 application tests applied at the end and two weeks after the course, we calculated  
6 correlations between the different outcome measures. Subjective learning outcomes  
7 correlated on a medium level with both the knowledge application post-test ( $r = .343$ ,  $n$   
8 = 88,  $p = .001$ ) and the delayed knowledge application post-test ( $r = .339$ ,  $n = 88$ ,  $p =$   
9 .001).  
10  
11  
12  
13  
14  
15  
16  
17

18 In the Live-CCD group, 83% of the students were in favour of implementing routine  
19 Live-CCD into the medical curriculum. Only 45% and 31% of students from the Video-  
20 CCD and Paper-Cases groups voted for an implementation of their respective course in  
21 the curriculum. With respect to the open items from the subjective learning outcomes  
22 questionnaire, participants from all groups praised the quality of the cases. Participants  
23 from the Live-CCD group particularly valued their course format for providing an  
24 opportunity to practice “diagnostic thinking” and the “focus on practice elements”. They  
25 also mentioned that “you can look up theoretical knowledge, but you can’t look up  
26 applied knowledge”. Students in the Video-CCD group, on the other hand, praised  
27 features of the digital learning environment as they could “pause, reflect, or quickly do a  
28 Google search” when watching the case discussions. However, they also criticised it  
29 was not possible for them to “participate in a more active way”.  
30  
31  
32  
33  
34  
35  
36  
37  
38  
39  
40  
41  
42  
43  
44  
45  
46  
47

## 48 **Discussion**

49  
50  
51 This randomised controlled study shows that even relatively short CCD interventions  
52 can lead to improved and sustainable learning outcomes with respect to clinical  
53 reasoning. This provides evidence that the CCD approach, which is based on  
54 Clinicopathological Conferences, is an effective teaching resource to foster clinical  
55  
56  
57  
58  
59  
60

1  
2  
3  
4 reasoning skills in medical students. We had hypothesised that a more interactive course  
5  
6 format would result in an improvement of clinical reasoning skills when compared with  
7  
8 less interactive formats. Results show that the Live-CCD indeed leads to the highest  
9  
10 learning outcomes in medical students compared to less interactive formats. Consistent  
11  
12 with our hypothesis, clinical reasoning skills, as measured with our knowledge  
13  
14 application test, had the highest gain in the Live-CCD group. These positive effects of  
15  
16 the CCD teaching format on clinical reasoning skills proved sustainable as shown by the  
17  
18 results in the delayed knowledge application post-test. Overall, these results are in line  
19  
20 with a recently published study on diagnostic reasoning[31] where students who worked  
21  
22 in pairs were more accurate in their diagnosis than individual students despite having  
23  
24 comparable knowledge. Collaborative clinical reasoning has thus far been  
25  
26 underrepresented in the literature, yet seems to solve many of the educational problems  
27  
28 regarding diagnostic errors.[32]

29  
30  
31  
32  
33  
34 The significant difference between the Live-CCD and the Video-CCD group can be  
35  
36 explained by the findings of a meta-analysis that showed technology-assisted single-  
37  
38 person learning to be inferior to group learning because of the decreased social  
39  
40 interaction.[33] However, it is important to note that two weeks after the course,  
41  
42 participants of the Live-CCD and Video-CCD groups did not differ significantly  
43  
44 anymore while both groups still clearly outperformed the Paper-Case group. In other  
45  
46 words, watching a video of the live case discussion was found to be more beneficial for  
47  
48 learners regarding their clinical reasoning skills than just reading the printed cases. We  
49  
50 cannot rule out that Live-CCD and Video-CCD groups did not differ in the delayed  
51  
52 knowledge application post-test due to underpowering of the study. As our trial was not  
53  
54 designed to detect smaller effect sizes, this finding has to be treated with caution.  
55  
56  
57  
58  
59  
60

1  
2  
3  
4 Subjective learning outcomes suggest that students prefer the live discussion over the  
5  
6 other formats. The subjective assessment correlated with the students' performance in  
7  
8 both knowledge application post-tests. Additional qualitative data from the open item  
9  
10 answers suggests that the Live-CCD format supported students in performing clinical  
11  
12 reasoning and that the active discussion of cases was particularly valued by the students.  
13  
14  
15  
16  
17

### 18 **Generalisability**

19  
20 The conclusions of this study are applicable to a broader audience of medical students.  
21  
22 The CCD approach and its respective formats can easily be implemented in routine  
23  
24 medical education. Peer teaching courses hold the promise of being more easy to install  
25  
26 and more easy to staff than courses led by faculty. Of course, live CCDs still come with  
27  
28 certain personnel requirements, as faculty as well as a moderator need to be present.  
29  
30 Extensive preparation was not necessary for the clinicians involved though as they  
31  
32 served as facilitators and provided guidance only in situations when they were explicitly  
33  
34 asked for their clinical judgement or when they felt that the discussion went astray.  
35  
36 Total time requirements might still be lower compared to other teaching formats.  
37  
38 Likewise, the implementation of a singular two-day training for moderators should not  
39  
40 require extensive resources. The study population consisting of students with  
41  
42 heterogeneous levels of clinical experience implies that the CCD is an effective teaching  
43  
44 format not only for students at the beginning of their clinical career but also for  
45  
46 intermediate students. On the other hand, generalisability is potentially limited as only  
47  
48 students from one medical school participated in our study.  
49  
50  
51  
52  
53  
54  
55  
56  
57  
58  
59  
60

### **Limitations of the study**

There are certain limitations of this study that have to be addressed: One important limitation is the single-centre nature of this study and the relatively small sample size. Before the CCD approach can be implemented on a larger scale, a validation of our findings is therefore required. Caution is clearly warranted with the effect sizes shown in this trial, as it has been shown that effect sizes of learning intervention trials tend to be inflated compared to the effectiveness of the intervention when used in routine education.[34] Since we did not limit the time students had to work on the cases, we cannot entirely rule out that less time was spent on task in the single-learner formats and particularly the Paper-Cases group. Against this backdrop, we suggest replication to further validate the results found in this study and strengthen the outlined implications. The knowledge application test utilized in this study did not allow for a more in-depth analysis of clinical reasoning skills (i.e. a distinction of conceptual, strategic, and conditional knowledge). Larger item numbers could facilitate a reliable assessment of changes on the level of corresponding subscales. Finally, we cannot relate the underlying reasoning process with the measured knowledge gains. Further studies on clinical reasoning processes of individuals and groups are methodologically challenging but urgently needed for the advancement of a model of clinical reasoning and for improving teaching clinical reasoning.[35]

### **Implications for policy makers / Future research questions**

Based on our findings, the CCD approach is a useful asset for medical educators to widen the range of clinical reasoning teaching tools. Live-CCD can thus be seen as a prime candidate for routine implementation in clinical reasoning curricula. Future

1  
2  
3  
4 research should aim to identify which Live-CCD elements (the roles, case contents, or  
5 the course structure) contribute in which way to the improvement of clinical reasoning  
6 skills in medical students. The question if and to what extent such skills are applicable  
7 across domains is currently being discussed.[36] Future studies may also address the  
8 issue of transfer (i.e. to what extent can clinical reasoning skills obtained in case-based  
9 training later be applied to different cases?).[37] Regarding the Video-CCD, means of  
10 instructional support to increase the effectiveness and interactivity of the video-based  
11 format should be investigated in an attempt to exploit its full potential.  
12  
13  
14  
15  
16  
17  
18  
19  
20  
21  
22  
23  
24  
25  
26

## 27 **Acknowledgements**

28  
29 The authors thank Johanna Huber and her team for technical support with the  
30 evaluation, Thomas Brendel and Thomas Bischoff for help with the video production  
31 and Mark S. Pecker for critical reading of our manuscript and valuable suggestions. The  
32 authors also thank the CCD student discussants and moderators for their contributions.  
33 We wish to sincerely address our gratitude to the CCD team for organisational support  
34 with the study: Nora Koenemann, Simone Reichert, Sandra Petrenz, Fabian Haak,  
35 Bjoern Stolte, Simon Berhe, Bastian Brandt, and Thomas Lautz. Marc Weidenbusch  
36 wishes to express special thanks to Bernd Gansbacher for introduction to CCDs.  
37  
38  
39  
40  
41  
42  
43  
44  
45  
46  
47  
48  
49

## 50 **Funding statement**

51 This work was supported by the German Federal Ministry of Education and Research  
52 (grant no. 01PL12016) and an intramural grant of the Medical Faculty of the University  
53 of Munich (Lehre@LMU).  
54  
55  
56  
57  
58  
59  
60



## Competing Interests

Marc Weidenbusch declares to have no conflict of interest.

Benedikt Lenzer declares to have no conflict of interest.

Maximilian Sailer declares to have no conflict of interest.

Christian Strobel declares to have no conflict of interest.

Raphael Kunisch declares to have no conflict of interest.

Jan Kiesewetter declares to have no conflict of interest.

Martin R. Fischer declares to have no conflict of interest.

Jan M. Zottmann declares to have no conflict of interest.

## Author contributions

MW, BL, MF and JZ planned the study.

MW, BL and CS were responsible for data acquisition.

MW, BL, RK, JK, JZ, MF and MS analysed and interpreted the data.

MW, BL and JZ drafted and revised the manuscript, all authors contributed significant intellectual content and all authors gave final approval of the version to be published.

## Data sharing statement

Dataset and detailed information about the CCD formats is available upon request.

## References

1. Frank JR, Snell LS, Cate OT, Holmboe ES, Carraccio C, Swing SR, et al. Competency-based medical education: Theory to practice. *Medical Teacher*. 2010;32(8):638-45.
2. Fischer MR, Bauer D, Mohn K, et al. Finally finished! National Competence Based Catalogues of Learning Objectives for Undergraduate Medical Education (NKLM) and Dental Education (NKLZ) ready for trial. *GMS Journal for Medical Education*. 2015;32(3):Doc35.
3. Harasym PH, Tsai TC, Hemmati P. Current trends in developing medical students' critical thinking abilities. *The Kaohsiung Journal of Medical Sciences*. 2008;24(7):341-55.
4. Donaldson MS, Corrigan JM, Kohn LT. *To err is human: Building a safer health system*. Washington: National Academies Press; 2000.
5. Kassirer JP. Teaching clinical medicine by iterative hypothesis testing: let's preach what we practice. *New England Journal of Medicine*. 1983;309(15):921-3.
6. Hege I, Ropp V, Adler M, Radon K, Mäsch G, Lyon H, et al. Experiences with different integration strategies of case-based e-learning. *Medical Teacher*. 2007;29(8):791-7.
7. Cannon WB. *The Case Method of Teaching Systematic Medicine*. The Boston Medical and Surgical Journal. 1900;142(2):31-6.
8. Eva KW. What every teacher needs to know about clinical reasoning. *Medical Education*. 2005;39(1):98-106.
9. Harris NL. Case records of the Massachusetts General Hospital – Continuing to learn from the patient. *New England Journal of Medicine*. 2003;348(22):2252-4.

- 1  
2  
3  
4 10. Cabot RC. Case teaching in medicine: A series of graduated exercises in the  
5 differential diagnosis, prognosis and treatment of actual cases of disease. Boston: Heath;  
6  
7 1906.
- 8  
9  
10  
11 11. Sturdy S. Knowing Cases: Biomedicine in Edinburgh, 1887-1920. *Social Studies*  
12 of Science. 2007;37(5):659-89.
- 13  
14  
15 12. Relman AS. Two Views. *New England Journal of Medicine*.  
16  
17 1979;301(20):1112-3.
- 18  
19  
20 13. Ertmer PA, Newby TJ. Behaviorism, cognitivism, constructivism: Comparing  
21 critical features from an instructional design perspective. *Performance Improvement*  
22 Quarterly. 1993;6(4):50-72.
- 23  
24  
25 14. Merseth KK. Cases and case methods in teacher education. In: Sikula J, Buttery  
26 TJ, Guyton R, editors. *Handbook of research on teacher education*. 2nd ed. New York,  
27 NY: Macmillan; 1996. p. 722-744.
- 28  
29  
30 15. Zottmann JM, Stegmann K, Strijbos J-W, Vogel F, Wecker C, Fischer F.  
31 Computer-supported collaborative learning with digital video cases in teacher  
32 education: The impact of teaching experience on knowledge convergence. *Computers in*  
33 *Human Behavior*. 2013;29(5):2100-8.
- 34  
35  
36 16. Powers BW, Navathe AS, Jain SH. Medical education's authenticity problem.  
37 *BMJ*. 2014;348:g2651.
- 38  
39  
40 17. Chi MTH, Wylie R. The ICAP framework: Linking cognitive engagement to  
41 active learning outcomes. *Educational Psychologist*. 2014;49(4):219-43.
- 42  
43  
44 18. Duncan RG, Rivet AE. Science learning progressions. *Science*.  
45  
46 2013;339(6118):396-7.
- 47  
48  
49  
50  
51  
52  
53  
54  
55  
56  
57  
58  
59  
60

- 1  
2  
3  
4 19. De Menezes S, Premnath D. Near-peer education: A novel teaching program.  
5  
6 International journal of medical education. 2016;7:160-167.  
7  
8  
9 20. Ince-Cushman D, Rudkin T, Rosenberg E. Supervised near-peer clinical  
10  
11 teaching in the ambulatory clinic: an exploratory study of family medicine residents'  
12  
13 perspectives. Perspectives on medical education. 2015;4(1):8-13.  
14  
15  
16 21. Chi MTH. Active-constructive-interactive: A conceptual framework for  
17  
18 differentiating learning activities. Topics in Cognitive Science. 2009;1(1):73-105.  
19  
20  
21 22. Ruiz JG, Mintzer MJ, Leipzig RM. The impact of e-learning in medical  
22  
23 education. Academic Medicine. 2006;81(3):207-12.  
24  
25  
26 23. Miller DC, Salkind NJ, editors. Handbook of Research Design & Social  
27  
28 Measurement. Thousand Oaks, CA: SAGE; 2002.  
29  
30  
31 24. Kotton DN, Muse VV, Nishino M. Case 2-2012. New England Journal of  
32  
33 Medicine. 2012;366(3):259-69.  
34  
35  
36 25. Marks PW, Zukerberg LR. Case 30-2004. New England Journal of Medicine.  
37  
38 2004;351(13):1333-41.  
39  
40  
41 26. Uyeki TM, Sharma A, Branda JA. Case 40-2009. New England Journal of  
42  
43 Medicine. 2009;361(26):2558-69.  
44  
45  
46 27. Braun LT, Zottmann JM, Adolf C, Lottspeich C, Then C, Wirth S, et al.  
47  
48 Representation scaffolds improve diagnostic efficiency in medical students. Medical  
49  
50 Education. 2017; 51(11):1118-1126.  
51  
52  
53 28. Kopp V, Stark R, Kühne-Eversmann L, Fischer MR. Do worked examples foster  
54  
55 medical students' diagnostic knowledge of hyperthyroidism? Medical Education.  
56  
57 2009;43(12):1210-7.  
58  
59  
60

- 1  
2  
3  
4 29. Schmidmaier R, Eiber S, Ebersbach R, Schiller M, Hege I, Holzer M, et al.  
5  
6 Learning the facts in medical school is not enough: Which factors predict successful  
7  
8 application of procedural knowledge in a laboratory setting? *BMC Medical Education*.  
9  
10 2013;13:28.  
11  
12  
13 30. Hausknecht JP, Halbert JA, Di Paolo NT, Moriarty Gerrard MO. Retesting  
14  
15 in selection: A meta-analysis of coaching and practice effects for tests of cognitive  
16  
17 ability. *Journal of Applied Psychology*. 2007;92(2):373–385.  
18  
19  
20 31. Hautz WE, Kämmer JE, Schauber SK, Spies CD, Gaissmaier W. Diagnostic  
21  
22 performance by medical students working individually or in teams. *JAMA*.  
23  
24 2015;313(3):303-4.  
25  
26  
27 32. Schmidt HG, Mamede S. How to improve the teaching of clinical reasoning: a  
28  
29 narrative review and a proposal. *Medical Education*. 2015;49(10):961-73.  
30  
31  
32 33. Lou Y, Abrami PC, d'Apollonia S. Small group and individual learning with  
33  
34 technology: A meta-analysis. *Review of Educational Research*. 2001;71(3):449-521.  
35  
36  
37 34. Springer L, Stanne ME, Donovan SS. Effects of small-group learning on  
38  
39 undergraduates in science, mathematics, engineering, and technology: A meta-analysis.  
40  
41 *Review of Educational Research*. 1999;69(1):21-51.  
42  
43  
44 35. Heitzmann N, Fischer MR, Fischer F. Towards more systematic and better  
45  
46 theorised research on simulations. *Medical Education*. 2017;51(2):129-131.  
47  
48  
49 36. Fischer F, Chinn C, Engelmann K, Osborne J, editors. *Scientific reasoning and  
50  
51 argumentation. The roles of general and specific knowledge*. New York, NY:  
52  
53 Routledge; 2018.  
54  
55  
56  
57  
58  
59  
60

1  
2  
3  
4 37. Keemink Y, Custers E, van Dijk S, ten Cate O. Illness script development in pre-  
5 clinical education through case-based clinical reasoning training. International Journal  
6 of Medical Education. 2018;9:35-41.  
7  
8  
9  
10  
11  
12  
13  
14  
15  
16  
17  
18  
19  
20  
21  
22  
23  
24  
25  
26  
27  
28  
29  
30  
31  
32  
33  
34  
35  
36  
37  
38  
39  
40  
41  
42  
43  
44  
45  
46  
47  
48  
49  
50  
51  
52  
53  
54  
55  
56  
57  
58  
59  
60

For peer review only

## Figure legends

*Figure 1: Study design.* Full data sets of 90 medical students were analysed. T\_0: knowledge application pre-test, T\_1: knowledge application post-test, T\_2: delayed knowledge application post-test.

*Figure 2: Live-CCD Structure.* CCD sessions are divided into three parts: In the *admission* part the presenting student shows the discussants his prepared slides (based on the original NEJM-case record), after which the group has to agree on an assessment of the patient under discussion. In the interactive *discussion* part the students prioritise the medical problems, link them to possible etiologies and order tests to further corroborate or discard differential diagnoses. After all the tests that were performed in the case record, the discussants order the putative diagnostic test. The result is disclosed along with the pathological discussion and “take home messages” on important differentials in the third part of the session. Abbreviations: CC chief complaint, HPI history of present illness, PMH past medical history, Meds medications, SH social history, FH family history, ROS review of systems, VS vital signs, PE physical examination, CMP comprehensive metabolic panel, CBC complete blood count, PT prothrombin time, PTT partial thromboplastin time, UA urine analysis, ECG electrocardiogram, CXR chest radiograph.

*Figure 3: Knowledge application test.* Exemplary items are shown for each of the knowledge types addressed (arrows point to the correct answers). The test included 11 items on conceptual knowledge, 9 items on strategic knowledge, and 9 items on conditional knowledge.

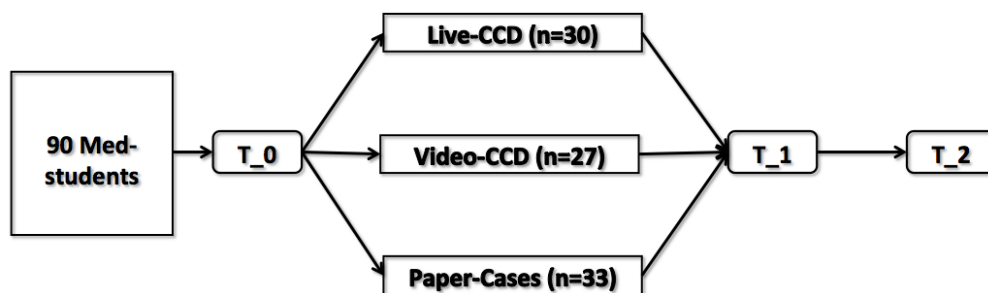

Figure 1: Study design. Full data sets of 90 medical students were analysed. T\_0: knowledge application pre-test, T\_1: knowledge application post-test, T\_2: delayed knowledge application post-test.



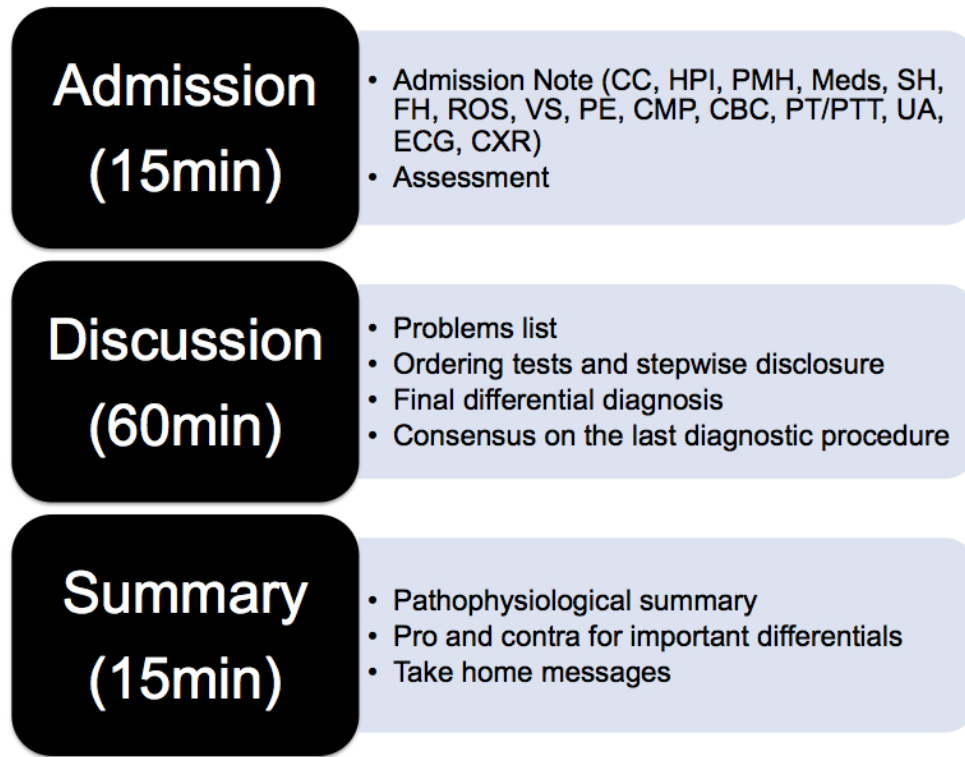

Figure 2: Live-CCD Structure. CCD sessions are divided into three parts: In the admission part the presenting student shows the discussants his prepared slides (based on the original NEJM-case record), after which the group has to agree on an assessment of the patient under discussion. In the interactive discussion part the students prioritise the medical problems, link them to possible etiologies and order tests to further corroborate or discard differential diagnoses. After all the tests that were performed in the case record, the discussants order the putative diagnostic test. The result is disclosed along with the pathological discussion and "take home messages" on important differentials in the third part of the session. Abbreviations: CC chief complaint, HPI history of present illness, PMH past medical history, Meds medications, SH social history, FH family history, ROS review of systems, VS vital signs, PE physical examination, CMP comprehensive metabolic panel, CBC complete blood count, PT prothrombin time, PTT partial thromboplastin time, UA urine analysis, ECG electrocardiogram, CXR chest radiograph.

### Conceptual knowledge

- What of the following medications is a neuraminidase inhibitor?  
Amantadin / Ledipasvir / Tenofovir / Dolutegravir / ➡ **Zanamivir**

### Strategic knowledge

A 54 year old woman is brought into your emergency department by EMS with cough, fever and dyspnea. History taking is almost impossible because the patient is somnolent. Her vital signs are: T 39,2 °C, BP 120/80 mmHG, HF 90 bpm, AF 30/min, SpO<sub>2</sub> 83% on ambient air, raising to 87% with 15l O<sub>2</sub>/min on a non-rebreather mask. PE: diffuse crackles over both lungs, peripheral cyanosis.

- What is the most pressing diagnostic or therapeutic measure?  
➡ **Intubation**

### Conditional knowledge

A 42 year old woman presents with a body weight of 35 kg and a BMI of 19,2. The patient tells you while weight loss was intentional in the beginning, it has now by far exceeded the desired extent. Lab values show macrocytic anemia and thrombocytopenia along with an eosinophilia of 800/μl. You suspect an infection with the fish tape worm *Diphyllobothrium latum*.

- Please elaborate what processes might underly the weight loss and the bicytopenia.  
➡ **Tape worm infection causes vitamin B12 deficiency-induced bicytopenia and malnutrition because of biological competition for enteral resorption of vitamins and nutrients**

Figure 3: Knowledge application test. Exemplary items are shown for each of the knowledge types addressed (arrows point to the correct answers). The test included 11 items on conceptual knowledge, 9 items on strategic knowledge, and 9 items on conditional knowledge.

150x135mm (600 x 600 DPI)

## Supplemental

*Baseline data: Demographic characteristics of the study participants.*

|                           | CCD format    |         |               |         |               |         |               |         |
|---------------------------|---------------|---------|---------------|---------|---------------|---------|---------------|---------|
|                           | Live-CCD      |         | Video-CCD     |         | Paper-Cases   |         | All formats   |         |
|                           | <i>n</i> = 30 |         | <i>n</i> = 27 |         | <i>n</i> = 33 |         | <i>N</i> = 90 |         |
| Gender distribution       |               |         |               |         |               |         |               |         |
| <i>N</i> m/f              | 14/16         |         | 5/22          |         | 12/21         |         | 31/59         |         |
| (% f)                     | (53.3% f)     |         | (81.5% f)     |         | (63.6% f)     |         | (65.6% f)     |         |
|                           | M             | (SD)    | M             | (SD)    | M             | (SD)    | M             | (SD)    |
| Age                       | 23.77         | (4.09)  | 22.26         | (1.77)  | 22.91         | (2.40)  | 23.0          | (2.97)  |
| Clinical semester         | 3.23          | (1.96)  | 3.41          | (1.47)  | 3.82          | (1.84)  | 3.50          | (1.78)  |
| High school grade         | 1.53          | (0.36)  | 1.35          | (0.42)  | 1.48          | (0.68)  | 1.46          | (0.52)  |
| First National Board Exam |               |         |               |         |               |         |               |         |
| Score                     | 245           | (30)    | 226           | (78)    | 246           | (30)    | 240           | (49)    |
| Participants with prior   |               |         |               |         |               |         |               |         |
| CCD experience            | 6             | (20.0%) | 6             | (22.2%) | 5             | (15.1%) | 17            | (18.9%) |
| n (%)                     |               |         |               |         |               |         |               |         |

1  
2  
3 *Questionnaire items (5-point Likert scale) for the assessment of subjective learning outcomes.*  
4  
5

- 6 1. I perceived this CCD format as meaningful.
  - 7 2. I learned a lot during the CCD course.
  - 8 3. The CCD course increased my learning motivation.
  - 9 4. I would like to participate in this CCD format again in the future.
  - 10 5. I enjoyed the CCD course.
  - 11 6. This CCD format should be offered as part of the curriculum.
  - 12 7. I was able to follow the case discussions.
  - 13 8. Learning in the CCD format is easier for me than learning in traditional lectures or seminars.
  - 14 9. How would you rate the course overall?
- 15  
16  
17  
18  
19  
20  
21  
22  
23  
24  
25  
26  
27  
28  
29  
30  
31  
32  
33  
34  
35  
36  
37  
38  
39  
40  
41  
42  
43  
44  
45  
46



## CONSORT 2010 checklist of information to include when reporting a randomised trial\*

| Section/Topic                    | Item No | Checklist item                                                                                                                                                                              | Reported on page No |
|----------------------------------|---------|---------------------------------------------------------------------------------------------------------------------------------------------------------------------------------------------|---------------------|
| <b>Title and abstract</b>        |         |                                                                                                                                                                                             |                     |
|                                  | 1a      | Identification as a randomised trial in the title                                                                                                                                           | 1                   |
|                                  | 1b      | Structured summary of trial design, methods, results, and conclusions (for specific guidance see CONSORT for abstracts)                                                                     | 2-3                 |
| <b>Introduction</b>              |         |                                                                                                                                                                                             |                     |
| Background and objectives        | 2a      | Scientific background and explanation of rationale                                                                                                                                          | 4-7                 |
|                                  | 2b      | Specific objectives or hypotheses                                                                                                                                                           | 6-7                 |
| <b>Methods</b>                   |         |                                                                                                                                                                                             |                     |
| Trial design                     | 3a      | Description of trial design (such as parallel, factorial) including allocation ratio                                                                                                        | 8                   |
|                                  | 3b      | Important changes to methods after trial commencement (such as eligibility criteria), with reasons                                                                                          | not applicable      |
| Participants                     | 4a      | Eligibility criteria for participants                                                                                                                                                       | 7                   |
|                                  | 4b      | Settings and locations where the data were collected                                                                                                                                        | 7                   |
| Interventions                    | 5       | The interventions for each group with sufficient details to allow replication, including how and when they were actually administered                                                       | 8-10                |
| Outcomes                         | 6a      | Completely defined pre-specified primary and secondary outcome measures, including how and when they were assessed                                                                          | 8, 11-12            |
|                                  | 6b      | Any changes to trial outcomes after the trial commenced, with reasons                                                                                                                       | not applicable      |
| Sample size                      | 7a      | How sample size was determined                                                                                                                                                              | 12                  |
|                                  | 7b      | When applicable, explanation of any interim analyses and stopping guidelines                                                                                                                | not applicable      |
| <b>Randomisation:</b>            |         |                                                                                                                                                                                             |                     |
| Sequence generation              | 8a      | Method used to generate the random allocation sequence                                                                                                                                      | 7                   |
|                                  | 8b      | Type of randomisation; details of any restriction (such as blocking and block size)                                                                                                         | 7                   |
| Allocation concealment mechanism | 9       | Mechanism used to implement the random allocation sequence (such as sequentially numbered containers), describing any steps taken to conceal the sequence until interventions were assigned | not applicable      |
| Implementation                   | 10      | Who generated the random allocation sequence, who enrolled participants, and who assigned participants to interventions                                                                     | not applicable      |
| Blinding                         | 11a     | If done, who was blinded after assignment to interventions (for example, participants, care providers, those                                                                                | not applicable      |

|                                                      |     |                                                                                                                                                   |                          |
|------------------------------------------------------|-----|---------------------------------------------------------------------------------------------------------------------------------------------------|--------------------------|
|                                                      |     | assessing outcomes) and how                                                                                                                       |                          |
|                                                      | 11b | If relevant, description of the similarity of interventions                                                                                       | not applicable           |
| Statistical methods                                  | 12a | Statistical methods used to compare groups for primary and secondary outcomes                                                                     | 12                       |
|                                                      | 12b | Methods for additional analyses, such as subgroup analyses and adjusted analyses                                                                  | 12                       |
| <b>Results</b>                                       |     |                                                                                                                                                   |                          |
| Participant flow (a diagram is strongly recommended) | 13a | For each group, the numbers of participants who were randomly assigned, received intended treatment, and were analysed for the primary outcome    | attached as supplemental |
|                                                      | 13b | For each group, losses and exclusions after randomisation, together with reasons                                                                  | 7                        |
| Recruitment                                          | 14a | Dates defining the periods of recruitment and follow-up                                                                                           | not applicable           |
|                                                      | 14b | Why the trial ended or was stopped                                                                                                                | not applicable           |
| Baseline data                                        | 15  | A table showing baseline demographic and clinical characteristics for each group                                                                  | attached as supplemental |
| Numbers analysed                                     | 16  | For each group, number of participants (denominator) included in each analysis and whether the analysis was by original assigned groups           | 13                       |
| Outcomes and estimation                              | 17a | For each primary and secondary outcome, results for each group, and the estimated effect size and its precision (such as 95% confidence interval) | 12-14                    |
|                                                      | 17b | For binary outcomes, presentation of both absolute and relative effect sizes is recommended                                                       | not applicable           |
| Ancillary analyses                                   | 18  | Results of any other analyses performed, including subgroup analyses and adjusted analyses, distinguishing pre-specified from exploratory         | not applicable           |
| Harms                                                | 19  | All important harms or unintended effects in each group (for specific guidance see CONSORT for harms)                                             | not applicable           |
| <b>Discussion</b>                                    |     |                                                                                                                                                   |                          |
| Limitations                                          | 20  | Trial limitations, addressing sources of potential bias, imprecision, and, if relevant, multiplicity of analyses                                  | 17                       |
| Generalisability                                     | 21  | Generalisability (external validity, applicability) of the trial findings                                                                         | 16                       |
| Interpretation                                       | 22  | Interpretation consistent with results, balancing benefits and harms, and considering other relevant evidence                                     | 14-16                    |
| <b>Other information</b>                             |     |                                                                                                                                                   |                          |
| Registration                                         | 23  | Registration number and name of trial registry                                                                                                    | not applicable           |
| Protocol                                             | 24  | Where the full trial protocol can be accessed, if available                                                                                       | 19                       |
| Funding                                              | 25  | Sources of funding and other support (such as supply of drugs), role of funders                                                                   | 18                       |

\*We strongly recommend reading this statement in conjunction with the CONSORT 2010 Explanation and Elaboration for important clarifications on all the items. If relevant, we also recommend reading CONSORT extensions for cluster randomised trials, non-inferiority and equivalence trials, non-pharmacological treatments, herbal interventions, and pragmatic trials. Additional extensions are forthcoming: for those and for up to date references relevant to this checklist, see [www.consort-statement.org](http://www.consort-statement.org).

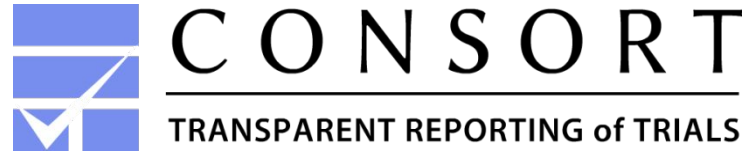

### CONSORT 2010 Flow Diagram

1  
2  
3  
4  
5  
6  
7  
8  
9  
10  
11  
12  
13  
14  
15  
16  
17  
18  
19  
20  
21  
22  
23  
24  
25  
26  
27  
28  
29  
30  
31  
32  
33  
34  
35  
36  
37  
38  
39  
40  
41  
42  
43  
44  
45  
46  
47

#### Enrollment

Assessed for eligibility (n=106)

Excluded (n=0)  
 ♦ Not meeting inclusion criteria (n=0)  
 ♦ Declined to participate (n=0)  
 ♦ Other reasons (n=0)

Randomised (n=106)

#### Allocation

Allocated to Live-CCD (n=35)  
 ♦ Received allocated intervention (n=35)  
 ♦ Did not receive allocated intervention (n=0)

Allocated to Video-CCD (n=34)  
 ♦ Received allocated intervention (n=34)  
 ♦ Did not receive allocated intervention (n=0)

Allocated to Paper-Cases (n=37)  
 ♦ Received allocated intervention (n=37)  
 ♦ Did not receive allocated intervention (n=0)

#### Follow-Up

Lost to follow-up/discontinued intervention (reasons not known) (n=5)

Lost to follow-up/discontinued intervention (reasons not known) (n=7)

Lost to follow-up/discontinued intervention (reasons not known) (n=4)

#### Analysis

Analysed (n=30)  
 ♦ Excluded from analysis because of incomplete datasets (n=5)

Analysed (n=27)  
 ♦ Excluded from analysis because of incomplete datasets (n=7)

Analysed (n=33)  
 ♦ Excluded from analysis because of incomplete datasets (n=4)

# BMJ Open

## Can Clinical Case Discussions foster clinical reasoning skills in undergraduate medical education? A randomised controlled trial

|                                 |                                                                                                                                                                                                                                                                                                                                                                                                                                                                                                                                                                                                                                                                                                                                                                                 |
|---------------------------------|---------------------------------------------------------------------------------------------------------------------------------------------------------------------------------------------------------------------------------------------------------------------------------------------------------------------------------------------------------------------------------------------------------------------------------------------------------------------------------------------------------------------------------------------------------------------------------------------------------------------------------------------------------------------------------------------------------------------------------------------------------------------------------|
| Journal:                        | <i>BMJ Open</i>                                                                                                                                                                                                                                                                                                                                                                                                                                                                                                                                                                                                                                                                                                                                                                 |
| Manuscript ID                   | bmjopen-2018-025973.R3                                                                                                                                                                                                                                                                                                                                                                                                                                                                                                                                                                                                                                                                                                                                                          |
| Article Type:                   | Research                                                                                                                                                                                                                                                                                                                                                                                                                                                                                                                                                                                                                                                                                                                                                                        |
| Date Submitted by the Author:   | 11-Jul-2019                                                                                                                                                                                                                                                                                                                                                                                                                                                                                                                                                                                                                                                                                                                                                                     |
| Complete List of Authors:       | Weidenbusch, Marc; University Hospital of LMU Munich, Institute for Medical Education; University Hospital of LMU Munich, Department of Internal Medicine IV<br>Lenzer, Benedikt; University Hospital of LMU Munich, Institute for Medical Education<br>Sailer, Maximilian; University of Passau, Department of Education<br>Strobel, Christian; University Hospital of LMU Munich, Institute for Medical Education<br>Kunisch, Raphael; University Hospital of LMU Munich, Institute for Medical Education<br>Kiesewetter, Jan; University Hospital of LMU Munich, Institute for Medical Education<br>Fischer, Martin; University Hospital of LMU Munich, Institute for Medical Education<br>Zottmann, Jan; University Hospital of LMU Munich, Institute for Medical Education |
| <b>Primary Subject Heading</b>: | Medical education and training                                                                                                                                                                                                                                                                                                                                                                                                                                                                                                                                                                                                                                                                                                                                                  |
| Secondary Subject Heading:      | Medical education and training                                                                                                                                                                                                                                                                                                                                                                                                                                                                                                                                                                                                                                                                                                                                                  |
| Keywords:                       | Undergraduate medical education, Case-based learning, Clinical reasoning, Social interaction, Medical decision making                                                                                                                                                                                                                                                                                                                                                                                                                                                                                                                                                                                                                                                           |
|                                 |                                                                                                                                                                                                                                                                                                                                                                                                                                                                                                                                                                                                                                                                                                                                                                                 |

SCHOLARONE™  
Manuscripts



## RESEARCH PAPER

**Can Clinical Case Discussions foster clinical reasoning skills in  
undergraduate medical education? A randomised controlled trial**

*Dr. med. Marc Weidenbusch<sup>1,2\*</sup>, Benedikt Lenzer<sup>2\*</sup>, Prof. Dr. phil. Maximilian Sailer<sup>3</sup>,  
Dr. phil. Christian Strobel<sup>2</sup>, Raphael Kunisch<sup>2</sup>, Dr. phil. Jan Kiesewetter<sup>2</sup>, Prof. Dr.  
med. Martin R. Fischer<sup>2</sup> & Dr. phil. Jan M. Zottmann<sup>2</sup>*

<sup>1</sup>Nephrologisches Zentrum, Medizinische Klinik und Poliklinik IV, Klinikum der  
Universität München, LMU München

<sup>2</sup>Institut für Didaktik und Ausbildungsforschung in der Medizin, Klinikum der  
Universität München, LMU München

<sup>3</sup>Department of Education, University of Passau

\*equal contribution

*Corresponding author:*

Dr. phil. Jan M. Zottmann

Institut für Didaktik und Ausbildungsforschung in der Medizin

Klinikum der Universität München, LMU München

Pettenkoferstr. 8a, D-80336 Munich, Germany

Tel: +49 89 4400 57203

Fax: +49 89 4400 57202

E-Mail: [jan.zottmann@med.uni-muenchen.de](mailto:jan.zottmann@med.uni-muenchen.de)

**Word count:** 3540 words

**Keywords:** undergraduate medical education, case-based learning, clinical reasoning,  
social interaction, medical decision making

## Abstract

**Objective:** Fostering clinical reasoning is a mainstay of medical education. Based on the Clinicopathological Conferences, we propose a case-based peer teaching approach called Clinical Case Discussions (CCDs) to promote the respective skills in medical students. This study compares the effectiveness of different CCD formats with varying degrees of social interaction in fostering clinical reasoning.

**Design, setting, participants:** A single-center randomised controlled trial with a parallel design was conducted at a German university. Study participants ( $N=106$ ) were stratified and tested regarding their clinical reasoning skills right after CCD participation and two weeks later.

**Intervention:** Participants worked either within a live discussion group (Live-CCD), a group watching recordings of the live discussions (Video-CCD), or a group working with printed cases (Paper-Cases). The presentation of case information followed an admission-, discussion-, summary-sequence.

**Primary and secondary outcome measures:** Clinical reasoning skills were measured with a knowledge application test addressing the students' conceptual, strategic, and conditional knowledge. Additionally, subjective learning outcomes were assessed.

**Results:** With respect to learning outcomes, the Live-CCD group displayed the best results, followed by Video-CCD and Paper-Cases,  $F(2,87)=27.07$ ,  $p<0.001$ , partial  $\eta^2=0.384$ . No difference was found between Live-CCD and Video-CCD groups in the delayed post-test; however, both outperformed the Paper-Cases group,  $F(2,87)=30.91$ ,  $p<0.001$ , partial  $\eta^2=0.415$ . Regarding subjective learning outcomes, the Live-CCD received significantly better ratings than the other formats,  $F(2,85)=13.16$ ,  $p<0.001$ , partial  $\eta^2=0.236$ .

1  
2  
3  
4 **Conclusions:** This study demonstrates that the CCD approach is an effective and  
5 sustainable clinical reasoning teaching resource for medical students. Subjective  
6 learning outcomes underline the importance of learner (inter-)activity in the acquisition  
7 of clinical reasoning skills in the context of case-based learning. Higher efficacy of  
8 more interactive formats can be attributed to positive effects of collaborative learning.  
9 Future research should investigate how the Live-CCD format can further be improved  
10 and how video-based CCDs can be enhanced through instructional support.  
11  
12  
13  
14  
15  
16  
17  
18  
19  
20  
21  
22

## 23 **Article summary**

### 24 **Strengths and limitations of this study:**

- 25 • First empirical study on the implementation of Clinical Case Discussions in  
26 undergraduate medical education.
- 27 • Comparison of Clinical Case Discussions with differing grades of social  
28 interaction to determine their effectiveness on medical students' acquisition of  
29 clinical reasoning skills by between-group analyses.
- 30 • Implementation of multidimensional and multilayered test instruments in a pre-,  
31 post- and delayed post-test design to measure clinical reasoning skills by a  
32 knowledge application test and self-assessment.
- 33 • The knowledge application test utilized in this study did not allow for a more in-  
34 depth analysis of clinical reasoning skills (i.e. a distinction of conceptual,  
35 strategic, and conditional knowledge).  
36  
37  
38  
39  
40  
41  
42  
43  
44  
45  
46  
47  
48  
49  
50  
51  
52  
53  
54  
55  
56  
57  
58  
59  
60

## Introduction

Curriculum developers face the challenge of implementing competence-oriented frameworks such as CanMEDS (Canada), the NKLM (Germany) or PROFILES (Switzerland), including the need to train clinical reasoning skills as a medical doctor's key competence.[1-3] As such, clinical reasoning skills are crucial not only for appropriate medical decision making, but also to avoid diagnostic errors and the associated harm for both patients and healthcare systems.[4]

Case-based learning has been proposed to foster clinical reasoning skills[5] and is well accepted among students.[6] Case-based learning found an early representation in Clinicopathological Conferences (CPC, first introduced by Cannon in 1900[7]) which are practiced until today. The Clinicopathological Conferences conducted at the Massachusetts General Hospital are published on a regular basis known as the *Case Records* series of the New England Journal of Medicine. In those CPCs the “medical mystery”[8] presented by the case under discussion calls readers to think about the possible diagnosis themselves, before it is finally disclosed at the last part of the CPC. Despite the absence of definitive evidence for efficacy as a teaching method, CPCs have widely been used in medical education since the early 20th century to foster clinical reasoning.[9-11] While these CPC-Case Records reaches lots of medical readers around the world, it has been criticised as being anachronistic with a diagnosing “star (i.e. the discussant), performing, acutely aware of being the center of attention”.[12]

Case-based learning formats are embedded in a context, which is known to promote learning better than providing facts in an abstract, non-contextual form.[13] A definition found in the review by Merseth suggests three essential elements of a case: A case is real (i.e. based on a real-life situation or event); it relies on careful research and study; it

1  
2  
3  
4 is “created explicitly for discussion and seeks to include sufficient detail and  
5  
6 information to elicit active analysis and interpretation by users”.<sup>[14]</sup> Cases may be  
7  
8 represented by means of text, pictures, videos, and the like. Realism and authenticity are  
9  
10 varying features of cases,<sup>[15]</sup> but particularly elaborated and authentic cases provide  
11  
12 increased diagnostic challenge, comprising added value for medical training.<sup>[16]</sup>  
13  
14

15  
16 However, due to their setup, CPCs are often a passive learning situation for participants,  
17  
18 as they listen to the discussant laying out his or her clinical reasoning on the case under  
19  
20 discussion. According to the ICAP framework by Chi et al.,<sup>[17]</sup> teaching formats  
21  
22 increase their efficacy from passive < active < constructive < interactive learning  
23  
24 environments. Learning is enhanced when students interactively engage in discussions  
25  
26 among each other. Accordingly, case-based learning has been found to be particularly  
27  
28 beneficial in collaborative settings.<sup>[15]</sup> However, another important aspect to consider  
29  
30 in collaborative learning environments is that some students may participate passively  
31  
32 while others contribute disproportionately much. To foster optimal learning effects,  
33  
34 students should thus be encouraged to be interactively engaged. One prerequisite to  
35  
36 achieve self-guided learning in groups is a low threshold for students to come forward  
37  
38 with their questions and participate in ensuing discussions.<sup>[18]</sup> To this end, peer  
39  
40 teaching has been established as an effective tool to stimulate discussions.<sup>[19]</sup> To make  
41  
42 sure peer tutors are not overwhelmed in moderating these discussions, the presence of  
43  
44 an experienced clinician appears to be warranted<sup>[20]</sup> in addition to a specific training of  
45  
46 the tutors.  
47  
48  
49  
50  
51

52  
53 Taken together, while traditional CPCs encompass some important dimensions of  
54  
55 effective case-based learning environments, they are not systematically aiming at  
56  
57 constructive or interactive learner activities that are known features of effective teaching  
58  
59  
60

1  
2  
3  
4 formats.[17,21] Therefore, we introduced Clinical Case Discussions (CCD) in  
5  
6 undergraduate medical education to account for these features. We still use the Case  
7  
8 Records of the Massachusetts General Hospital,[9] as these cases exemplify realistic  
9  
10 patient encounters and fulfill the criteria for an interactive collaborative learning process  
11  
12 as explained above. In the CCD approach, cases are typically presented with  
13  
14 information until the admission of the patient to the hospital. This event is usually the  
15  
16 starting point of an interactive discussion phase of the group about possible diagnoses  
17  
18 and diagnostic strategies. After all test results have been discussed, the actual diagnosis  
19  
20 is disclosed and the pitfalls and take-home messages of the case are summarised.  
21  
22

23  
24 To investigate the effectiveness of the CCD approach in undergraduate medical  
25  
26 education, we designed an intervention trial and assessed clinical reasoning skills in  
27  
28 medical students before and after *participating in live CCDs or being exposed to video*  
29  
30 recordings of live CCDs. We compared these formats and its effects on clinical  
31  
32 reasoning with the more traditional approach of working through written cases. When  
33  
34 carrying out this randomised trial, we hypothesised that participation in live CCD  
35  
36 sessions would lead to a higher increase of clinical reasoning skills than simply reading  
37  
38 the cases. To better understand possible effects of the CCD learning environment with  
39  
40 its social components on learning outcomes, participation in live CCDs as outlined  
41  
42 above was additionally compared to the effects of watching videos of CCDs online.  
43  
44 This comparison also seemed relevant from an economic point of view as video-  
45  
46 streaming of lectures and seminars are prevalent at many institutions in higher  
47  
48 education allowing for flexible and scalable access to learning materials.[22] To  
49  
50 investigate the potential of different CCD formats for regular curricular use, we also  
51  
52  
53  
54  
55  
56  
57  
58  
59  
60

1  
2  
3  
4 measured subjective learning outcomes after the intervention and correlated student  
5 self-assessments with objective changes in their clinical reasoning skills.  
6  
7  
8  
9

## 10 11 **Methods**

### 12 13 **Participants / Ethics**

14  
15  
16 Initially, we recruited 106 volunteer medical students at the Medical Faculty of LMU  
17 Munich. Randomisation was performed in a two-step procedure: First, we selected a  
18 sample of roughly 100 enrolled students. Next, we stratified participants by creating  
19 triplets on the basis of the variables age, gender, year of study, prior CCD participation  
20 and performance in a knowledge application pre-test. This was done in an effort to limit  
21 the risk of random misdistribution of the selected sample. From each triplet we  
22 randomly assigned participants to the experimental groups. A total of 90 participants  
23 eventually completed the study, 31 of them were male and 59 female. They were 20 to  
24 41 years old ( $M=23$ ;  $SD=2.97$ ) and in their first to eighth clinical semester ( $M=3.50$ ;  
25  $SD=1.78$ ).  
26  
27  
28  
29  
30  
31  
32  
33  
34  
35  
36  
37  
38

39 The study was approved by the ethics committee of the Medical Faculty of LMU  
40 Munich (approval reference no. 222-15). Written informed consent was obtained from  
41 all study participants and they received a financial reimbursement of 50 Euros upon  
42 completion of the trial.  
43  
44  
45  
46  
47  
48  
49

### 50 51 **Patient and public involvement**

52  
53 No patients or public were involved in this research.  
54  
55  
56

### 57 58 **Study design**

1  
2  
3  
4 We conducted a single-center randomised controlled trial consisting of a total of five  
5 course sessions with a parallel design (see Figure 1). One week prior to the first CCD  
6 session, participants were introduced to the principles of the CCD approach and the  
7 sequence of this trial in an introductory session where they also took a knowledge  
8 application pre-test (T\_0). In the experimental phase, participants attended three weekly  
9 interventional course sessions of 90 minutes each in one of the three aforementioned  
10 groups with the respective CCD formats. Participants took a knowledge application  
11 post-test at the end of the last experimental course session (T\_1), four weeks after pre-  
12 testing. A delayed knowledge application post-test was conducted two weeks after  
13 completion of the interventional courses (T\_2); we deliberately chose that time interval  
14 to investigate the sustainability of possible effects while balancing the risk of post-  
15 intervention confounding.[23]

16  
17  
18  
19  
20  
21  
22  
23  
24  
25  
26  
27  
28  
29  
30  
31  
32 \*\*\*\*\*

33 Insert Figure 1 about here

34  
35  
36 \*\*\*\*\*

## 37 **Materials**

38  
39 In all experimental groups the intervention was based on the same three, independent  
40 internal medicine cases. Chief complaints in these cases were paresthesia (first session),  
41 fever and respiratory failure (second session), and rapidly progressive respiratory failure  
42 (third session).[24-26] Cases were worked through in an iterative approach in different  
43 formats: (a) peer-moderated live case discussions in an interactive setting (Live-CCD,  
44  $n=30$ ), (b) a single-learner format utilizing an interactive multimedia platform  
45 displaying video recordings of the live case discussions (Video-CCD,  $n=27$ ), and (c) a  
46 single-learner format in which the students worked with the original paper cases of the  
47  
48  
49  
50  
51  
52  
53  
54  
55  
56  
57  
58  
59  
60



1  
2  
3  
4 NEJM (Paper-Cases,  $n=33$ ). The cases were prepared in a way that participants in each  
5  
6 format were exposed to the same case information.  
7  
8  
9

## 10 11 **Procedure**

12  
13 In all three groups cases were presented in a specified structured manner similar to the  
14  
15 original Clinicopathological Conferences (see Figure 2). In each format the students  
16  
17 (“discussants”) had to fill out a form after the admission in which the case had to be  
18  
19 summarised and a list of clinical problems and working diagnoses had to be provided.  
20  
21 Subsequently, between discussion and summary a second case-summary had to be  
22  
23 completed in which the final diagnostic test and the most likely diagnosis had to be  
24  
25 proposed.  
26  
27  
28

29 \*\*\*\*\*

30  
31 Insert Figure 2 about here

32  
33 \*\*\*\*\*

34  
35 In the Live-CCD group, the case presentation was prepared beforehand by a voluntary  
36  
37 discussant (“presenter”), who presented the facts in the admission (according to the  
38  
39 structure shown in Figure 2). Electronic slides and flipcharts were used to transport case  
40  
41 information. Original test results were revealed by the presenter during the discussion  
42  
43 only when requested by the group of students. Furthermore, the presenter summarised  
44  
45 the differential diagnosis, important pathophysiological features of the case at the end of  
46  
47 the session and provided a short take home message. The moderating medical students  
48  
49 (“moderator”) were recruited among previous CCD participants. They had experience in  
50  
51 CCD moderation and had had an introductory training (two days) in higher education  
52  
53 methods and group facilitation prior to the study. The moderator facilitated the  
54  
55 discussion process and ensured a reasonable approach to the patient encounter (e.g. with  
56  
57  
58  
59  
60

1  
2  
3  
4 respect to timing and hierarchy of ordered tests) in close communication with the  
5  
6 discussants. Moreover, the moderator helped students develop their diagnostic strategy  
7  
8 by co-evaluating their requested findings and the reasoning employed. Supervision of  
9  
10 the correctness of medical facts and the correct diagnostic approach were ultimately  
11  
12 granted by a clinician who could stop the discussion at any point when faulty reasoning  
13  
14 was evident or discussants explicitly requested the facilitation of an experienced  
15  
16 physician. The clinicians' level of involvement into the discussion was left at their own  
17  
18 discretion. We varied the staff between each Live-CCD to minimise effects of personal  
19  
20 teacher characteristics. Live sessions typically lasted 90 minutes and were recorded with  
21  
22 multiple cameras.  
23  
24  
25

26  
27 Students in the Video-CCD format worked on a single-learner multimedia workstation  
28  
29 on which a video recording of the Live-CCD were displayed. These recordings also  
30  
31 contained the electronic slide presentation from the Live-CCD and enabled  
32  
33 simultaneous observation of the discussion from multiple camera angles. Participants  
34  
35 could pause and partially skip the videos.  
36  
37

38  
39 In the Paper-Cases group participants received the case information of each CCD  
40  
41 section sequentially (i.e. admission, discussion, summary) in a print format. In both  
42  
43 single-learner formats students could choose their personal working speed. There was  
44  
45 neither a prespecified minimum nor a maximum time they were required to work on the  
46  
47 cases. In each of the three formats full access to the internet was permitted for additional  
48  
49 information.  
50  
51  
52  
53  
54  
55  
56  
57  
58  
59  
60

## Instruments

Learning outcomes with respect to clinical reasoning were measured with a knowledge application test that consisted of 29 items (i.e. a maximum of 29 points could be achieved) and was to be filled out within 45 minutes. The knowledge application test was based on instruments previously developed at the Institute for Medical Education at LMU Munich.[27-29] It comprised multiple choice items, key feature problems and problem-solving tasks, addressing the conceptual, strategic, and conditional knowledge of the participants (see Figure 3). Meta-analyses on retest effects suggest that score increase is higher for identical forms than for parallel test forms.[30] In order to limit such effects, we applied parallel forms of the knowledge application test for pre- and post-measurements (i.e. topics covered by the individual items were the same, but the items were reformulated and their order was permuted). Overall test difficulty was chosen to be high in order to avoid ceiling effects, as students from all clinical years were allowed to participate in the study. Overall test reliability was satisfactory (Cronbach's  $\alpha=0.71$ ).

\*\*\*\*\*

Insert Figure 3 about here

\*\*\*\*\*

Subjective learning outcomes were measured at T<sub>1</sub> with a short questionnaire consisting of 9 items (e.g. "I learned a lot during the CCD course", "The CCD course increased my learning motivation" or "I recommend the implementation of the CCD teaching format into the curriculum"; the full questionnaire is available as a supplementary file). Participants were asked to rate these items on a Likert scale ranging from 1 (I don't agree) to 5 (I fully agree). Reliability of the corresponding scale was good (Cronbach's  $\alpha=0.95$ ). Additionally, study participants were asked to share their

1  
2  
3  
4 views on positive and negative aspects of the respective training format through open  
5  
6 items at the end of the questionnaire.  
7  
8  
9

## 10 11 **Statistical Analysis**

12  
13 The required sample size ( $N=128$ ) was estimated to detect medium effect sizes with a  
14  
15 power of 80% and a significance level of  $\alpha=0.05$ . For between-group analyses, one-way  
16  
17 ANOVAs were conducted with *post-hoc* Bonferroni tests for multiple comparisons.  
18  
19  
20  
21

## 22 23 **Results**

### 24 25 **Effects of the CCD format on learning outcomes related to Clinical Reasoning**

26  
27 Experimental groups differed significantly with respect to the knowledge application  
28  
29 post-test (see Table 1),  $F(2,87)=27.07$ ,  $p<0.001$ , partial  $\eta^2=0.384$ . The Live-CCD group  
30  
31 ( $M=14.10$ ;  $SD=3.32$ ) outperformed both the Video-CCD ( $M=11.69$ ;  $SD=3.34$ ) and the  
32  
33 Paper-Cases group ( $M=8.50$ ;  $SD=2.44$ ). Post hoc Bonferroni tests revealed significant  
34  
35 differences between Live-CCD and Video-CCD ( $p=0.011$ ) as well as the Paper-Cases  
36  
37 group ( $p<0.001$ ). The difference in the knowledge application post-test between Video-  
38  
39 CCD and the Paper-Cases group was also significant ( $p<0.001$ ).  
40  
41  
42

43  
44 Two weeks after course completion, the effect of the teaching format was still found in  
45  
46 a delayed knowledge application post-test,  $F(2,87)=30.91$ ,  $p<0.001$ , partial  $\eta^2=0.415$ .  
47  
48 Both Live-CCD ( $M=13.36$ ;  $SD=3.23$ ) and the Video-CCD ( $M=11.84$ ;  $SD=2.92$ )  
49  
50 outperformed the Paper-Cases group ( $M=7.89$ ;  $SD=2.41$ ). Post hoc Bonferroni tests  
51  
52 revealed significant differences between the Live-CCD and Paper-Cases group  
53  
54 ( $p<0.001$ ) as well as between the Video-CCD and Paper-Cases group ( $p<0.001$ ).  
55  
56  
57  
58  
59  
60

However, the difference between Live-CCD and Video-CCD was not significant in the delayed knowledge application post-test ( $p=0.146$ ).

Table 1. Overview of the findings of the study.

|                                         | Teaching format |        |           |        |             |        |
|-----------------------------------------|-----------------|--------|-----------|--------|-------------|--------|
|                                         | Live-CCD        |        | Video-CCD |        | Paper-Cases |        |
|                                         | M               | (SD)   | M         | (SD)   | M           | (SD)   |
| Knowledge application pre-test          | 5.34            | (1.92) | 4.76      | (1.90) | 5.76        | (2.24) |
|                                         | $n=30$          |        | $n=27$    |        | $n=33$      |        |
| Knowledge application post-test         | 14.10           | (3.32) | 11.69     | (3.34) | 8.50        | (2.44) |
|                                         | $n=30$          |        | $n=27$    |        | $n=33$      |        |
| Delayed knowledge application post-test | 13.36           | (3.23) | 11.84     | (2.92) | 7.89        | (2.41) |
|                                         | $n=30$          |        | $n=27$    |        | $n=33$      |        |
| Subjective learning outcomes            | 4.20            | (0.63) | 3.18      | (1.24) | 3.00        | (0.99) |
|                                         | $n=30$          |        | $n=27$    |        | $n=31$      |        |

### Effects of the CCD format on subjective learning outcomes

Experimental groups differed significantly with respect to subjective learning outcomes (see Table 1),  $F(2,85)=13.16$ ,  $p<0.001$ , partial  $\eta^2=0.236$ . Participants of the Live-CCD group ( $M=4.20$ ;  $SD=0.63$ ) assigned better ratings to their course format than participants in the Video-CCD group ( $M=3.18$ ;  $SD=1.24$ ) and the Paper-Cases group ( $M=3.00$ ;  $SD=0.99$ ). Post hoc Bonferroni tests showed that the Live-CCD differed from the Video-CCD ( $p=0.001$ ) and the Paper-Cases group ( $p<0.001$ ) in this regard. An additional Duncan post-hoc test confirmed that the Video-CCD and the Paper-Cases group did not differ from each other in this regard ( $p=0.48$ ).

1  
2  
3  
4 To investigate the relations between the subjective assessment and the knowledge  
5 application tests applied at the end and two weeks after the course, we calculated  
6 correlations between the different outcome measures. Subjective learning outcomes  
7 correlated on a medium level with both the knowledge application post-test ( $r=0.343$ ,  
8  $n=88$ ,  $p=0.001$ ) and the delayed knowledge application post-test ( $r=0.339$ ,  $n=88$ ,  
9  $p=0.001$ ).

10  
11 In the Live-CCD group, 83% of the students were in favour of implementing routine  
12 Live-CCD into the medical curriculum. Only 45% and 31% of students from the Video-  
13 CCD and Paper-Cases groups voted for an implementation of their respective course in  
14 the curriculum. With respect to the open items from the subjective learning outcomes  
15 questionnaire, participants from all groups praised the quality of the cases. Participants  
16 from the Live-CCD group particularly valued their course format for providing an  
17 opportunity to practice “diagnostic thinking” and the “focus on practice elements”. They  
18 also mentioned that “you can look up theoretical knowledge, but you can’t look up  
19 applied knowledge”. Students in the Video-CCD group, on the other hand, praised  
20 features of the digital learning environment as they could “pause, reflect, or quickly do a  
21 Google search” when watching the case discussions. However, they also criticised it  
22 was not possible for them to “participate in a more active way”.

## 48 Discussion

49  
50 This randomised controlled study shows that even relatively short CCD interventions  
51 can lead to improved and sustainable learning outcomes with respect to clinical  
52 reasoning. This provides evidence that the CCD approach, which is based on  
53 Clinicopathological Conferences, is an effective teaching resource to foster clinical  
54  
55  
56  
57  
58  
59  
60

1  
2  
3  
4 reasoning skills in medical students. We had hypothesised that a more interactive course  
5  
6 format would result in an improvement of clinical reasoning skills when compared with  
7  
8 less interactive formats. Results show that the Live-CCD indeed leads to the highest  
9  
10 learning outcomes in medical students compared to less interactive formats. Consistent  
11  
12 with our hypothesis, clinical reasoning skills, as measured with our knowledge  
13  
14 application test, had the highest gain in the Live-CCD group. These positive effects of  
15  
16 the CCD teaching format on clinical reasoning skills proved sustainable as shown by the  
17  
18 results in the delayed knowledge application post-test. Overall, these results are in line  
19  
20 with a recently published study on diagnostic reasoning[31] where students who worked  
21  
22 in pairs were more accurate in their diagnosis than individual students despite having  
23  
24 comparable knowledge. Collaborative clinical reasoning has thus far been  
25  
26 underrepresented in the literature, yet seems to solve many of the educational problems  
27  
28 regarding diagnostic errors.[32]

29  
30  
31  
32  
33  
34 The significant difference between the Live-CCD and the Video-CCD group can be  
35  
36 explained by the findings of a meta-analysis that showed technology-assisted single-  
37  
38 person learning to be inferior to group learning because of the decreased social  
39  
40 interaction.[33] However, it is important to note that two weeks after the course,  
41  
42 participants of the Live-CCD and Video-CCD groups did not differ significantly  
43  
44 anymore while both groups still clearly outperformed the Paper-Case group. In other  
45  
46 words, watching a video of the live case discussion was found to be more beneficial for  
47  
48 learners regarding their clinical reasoning skills than just reading the printed cases. We  
49  
50 cannot rule out that Live-CCD and Video-CCD groups did not differ in the delayed  
51  
52 knowledge application post-test due to underpowering of the study. As our trial was not  
53  
54 designed to detect smaller effect sizes, this finding has to be treated with caution.  
55  
56  
57  
58  
59  
60

1  
2  
3  
4 Subjective learning outcomes suggest that students prefer the live discussion over the  
5  
6 other formats. The subjective assessment correlated with the students' performance in  
7  
8 both knowledge application post-tests. Additional qualitative data from the open item  
9  
10 answers suggests that the Live-CCD format supported students in performing clinical  
11  
12 reasoning and that the active discussion of cases was particularly valued by the students.  
13  
14  
15  
16  
17

### 18 **Generalisability**

19  
20 The conclusions of this study are applicable to a broader audience of medical students.  
21  
22 The CCD approach and its respective formats can easily be implemented in routine  
23  
24 medical education. Peer teaching courses hold the promise of being more easy to install  
25  
26 and more easy to staff than courses led by faculty. Of course, live CCDs still come with  
27  
28 certain personnel requirements, as faculty as well as a moderator need to be present.  
29  
30 Extensive preparation was not necessary for the clinicians involved though as they  
31  
32 served as facilitators and provided guidance only in situations when they were explicitly  
33  
34 asked for their clinical judgement or when they felt that the discussion went astray.  
35  
36 Total time requirements might still be lower compared to other teaching formats.  
37  
38 Likewise, the implementation of a singular two-day training for moderators should not  
39  
40 require extensive resources. The study population consisting of students with  
41  
42 heterogeneous levels of clinical experience implies that the CCD is an effective teaching  
43  
44 format not only for students at the beginning of their clinical career but also for  
45  
46 intermediate students. On the other hand, generalisability is potentially limited as only  
47  
48 students from one medical school participated in our study.  
49  
50  
51  
52  
53  
54  
55  
56  
57  
58  
59  
60



### **Limitations of the study**

There are certain limitations of this study that have to be addressed: One important limitation is the single-centre nature of this study and the relatively small sample size. Before the CCD approach can be implemented on a larger scale, a validation of our findings is therefore required. Caution is clearly warranted with the effect sizes shown in this trial, as it has been shown that effect sizes of learning intervention trials tend to be inflated compared to the effectiveness of the intervention when used in routine education.[34] Since we did not limit the time students had to work on the cases, we cannot entirely rule out that less time was spent on task in the single-learner formats and particularly the Paper-Cases group. Against this backdrop, we suggest replication to further validate the results found in this study and strengthen the outlined implications. The knowledge application test utilized in this study did not allow for a more in-depth analysis of clinical reasoning skills (i.e. a distinction of conceptual, strategic, and conditional knowledge). Larger item numbers could facilitate a reliable assessment of changes on the level of corresponding subscales. Finally, we cannot relate the underlying reasoning process with the measured knowledge gains. Further studies on clinical reasoning processes of individuals and groups are methodologically challenging but urgently needed for the advancement of a model of clinical reasoning and for improving teaching clinical reasoning.[35]

### **Implications for policy makers / Future research questions**

Based on our findings, the CCD approach is a useful asset for medical educators to widen the range of clinical reasoning teaching tools. Live-CCD can thus be seen as a prime candidate for routine implementation in clinical reasoning curricula. Future

1  
2  
3  
4 research should aim to identify which Live-CCD elements (the roles, case contents, or  
5 the course structure) contribute in which way to the improvement of clinical reasoning  
6 skills in medical students. The question if and to what extent such skills are applicable  
7 across domains is currently being discussed.[36] Future studies may also address the  
8 issue of transfer (i.e. to what extent can clinical reasoning skills obtained in case-based  
9 training later be applied to different cases?).[37] Regarding the Video-CCD, means of  
10 instructional support to increase the effectiveness and interactivity of the video-based  
11 format should be investigated in an attempt to exploit its full potential.  
12  
13  
14  
15  
16  
17  
18  
19  
20  
21  
22  
23  
24  
25  
26

## 27 **Acknowledgements**

28  
29 The authors thank Johanna Huber and her team for technical support with the  
30 evaluation, Thomas Brendel and Thomas Bischoff for help with the video production  
31 and Mark S. Pecker for critical reading of our manuscript and valuable suggestions. The  
32 authors also thank the CCD student discussants and moderators for their contributions.  
33 We wish to sincerely address our gratitude to the CCD team for organisational support  
34 with the study: Nora Koenemann, Simone Reichert, Sandra Petrenz, Fabian Haak,  
35 Bjoern Stolte, Simon Berhe, Bastian Brandt, and Thomas Lautz. Marc Weidenbusch  
36 wishes to express special thanks to Bernd Gansbacher for introduction to CCDs.  
37  
38  
39  
40  
41  
42  
43  
44  
45  
46  
47  
48  
49

## 50 **Funding statement**

51 This work was supported by the German Federal Ministry of Education and Research  
52 (grant no. 01PL12016) and an intramural grant of the Medical Faculty of the University  
53 of Munich (Lehre@LMU).  
54  
55  
56  
57  
58  
59  
60

## Competing Interests

Marc Weidenbusch declares to have no conflict of interest.

Benedikt Lenzer declares to have no conflict of interest.

Maximilian Sailer declares to have no conflict of interest.

Christian Strobel declares to have no conflict of interest.

Raphael Kunisch declares to have no conflict of interest.

Jan Kiesewetter declares to have no conflict of interest.

Martin R. Fischer declares to have no conflict of interest.

Jan M. Zottmann declares to have no conflict of interest.

## Author contributions

MW, BL, MF and JZ planned the study.

MW, BL and CS were responsible for data acquisition.

MW, BL, RK, JK, JZ, MF and MS analysed and interpreted the data.

MW, BL and JZ drafted and revised the manuscript, all authors contributed significant intellectual content and all authors gave final approval of the version to be published.

## Data sharing statement

Dataset and detailed information about the CCD formats is available upon request.

## References

1. Frank JR, Snell LS, Cate OT, Holmboe ES, Carraccio C, Swing SR, et al. Competency-based medical education: Theory to practice. *Medical Teacher*. 2010;32(8):638-45.
2. Fischer MR, Bauer D, Mohn K, et al. Finally finished! National Competence Based Catalogues of Learning Objectives for Undergraduate Medical Education (NKLM) and Dental Education (NKLZ) ready for trial. *GMS Journal for Medical Education*. 2015;32(3):Doc35.
3. Harasym PH, Tsai TC, Hemmati P. Current trends in developing medical students' critical thinking abilities. *The Kaohsiung Journal of Medical Sciences*. 2008;24(7):341-55.
4. Donaldson MS, Corrigan JM, Kohn LT. *To err is human: Building a safer health system*. Washington: National Academies Press; 2000.
5. Kassirer JP. Teaching clinical medicine by iterative hypothesis testing: let's preach what we practice. *New England Journal of Medicine*. 1983;309(15):921-3.
6. Hege I, Kopp V, Adler M, Radon K, Mäsch G, Lyon H, et al. Experiences with different integration strategies of case-based e-learning. *Medical Teacher*. 2007;29(8):791-7.
7. Cannon WB. *The Case Method of Teaching Systematic Medicine*. The Boston Medical and Surgical Journal. 1900;142(2):31-6.
8. Eva KW. What every teacher needs to know about clinical reasoning. *Medical Education*. 2005;39(1):98-106.
9. Harris NL. Case records of the Massachusetts General Hospital – Continuing to learn from the patient. *New England Journal of Medicine*. 2003;348(22):2252-4.

- 1  
2  
3  
4 10. Cabot RC. Case teaching in medicine: A series of graduated exercises in the  
5 differential diagnosis, prognosis and treatment of actual cases of disease. Boston: Heath;  
6  
7 1906.
- 8  
9  
10  
11 11. Sturdy S. Knowing Cases: Biomedicine in Edinburgh, 1887-1920. *Social Studies*  
12 of Science. 2007;37(5):659-89.
- 13  
14  
15 12. Relman AS. Two Views. *New England Journal of Medicine*.  
16  
17 1979;301(20):1112-3.
- 18  
19  
20 13. Ertmer PA, Newby TJ. Behaviorism, cognitivism, constructivism: Comparing  
21 critical features from an instructional design perspective. *Performance Improvement*  
22 Quarterly. 1993;6(4):50-72.
- 23  
24  
25 14. Merseth KK. Cases and case methods in teacher education. In: Sikula J, Buttery  
26 TJ, Guyton R, editors. *Handbook of research on teacher education*. 2nd ed. New York,  
27 NY: Macmillan; 1996. p. 722-744.
- 28  
29  
30 15. Zottmann JM, Stegmann K, Strijbos J-W, Vogel F, Wecker C, Fischer F.  
31 Computer-supported collaborative learning with digital video cases in teacher  
32 education: The impact of teaching experience on knowledge convergence. *Computers in*  
33 *Human Behavior*. 2013;29(5):2100-8.
- 34  
35  
36 16. Powers BW, Navathe AS, Jain SH. Medical education's authenticity problem.  
37 *BMJ*. 2014;348:g2651.
- 38  
39  
40 17. Chi MTH, Wylie R. The ICAP framework: Linking cognitive engagement to  
41 active learning outcomes. *Educational Psychologist*. 2014;49(4):219-43.
- 42  
43  
44 18. Duncan RG, Rivet AE. Science learning progressions. *Science*.  
45  
46 2013;339(6118):396-7.
- 47  
48  
49  
50  
51  
52  
53  
54  
55  
56  
57  
58  
59  
60

- 1  
2  
3  
4 19. De Menezes S, Premnath D. Near-peer education: A novel teaching program.  
5  
6 International journal of medical education. 2016;7:160-167.  
7  
8  
9 20. Ince-Cushman D, Rudkin T, Rosenberg E. Supervised near-peer clinical  
10  
11 teaching in the ambulatory clinic: an exploratory study of family medicine residents'  
12  
13 perspectives. Perspectives on medical education. 2015;4(1):8-13.  
14  
15  
16 21. Chi MTH. Active-constructive-interactive: A conceptual framework for  
17  
18 differentiating learning activities. Topics in Cognitive Science. 2009;1(1):73-105.  
19  
20  
21 22. Ruiz JG, Mintzer MJ, Leipzig RM. The impact of e-learning in medical  
22  
23 education. Academic Medicine. 2006;81(3):207-12.  
24  
25  
26 23. Miller DC, Salkind NJ, editors. Handbook of Research Design & Social  
27  
28 Measurement. Thousand Oaks, CA: SAGE; 2002.  
29  
30  
31 24. Kotton DN, Muse VV, Nishino M. Case 2-2012. New England Journal of  
32  
33 Medicine. 2012;366(3):259-69.  
34  
35  
36 25. Marks PW, Zukerberg LR. Case 30-2004. New England Journal of Medicine.  
37  
38 2004;351(13):1333-41.  
39  
40  
41 26. Uyeki TM, Sharma A, Branda JA. Case 40-2009. New England Journal of  
42  
43 Medicine. 2009;361(26):2558-69.  
44  
45  
46 27. Braun LT, Zottmann JM, Adolf C, Lottspeich C, Then C, Wirth S, et al.  
47  
48 Representation scaffolds improve diagnostic efficiency in medical students. Medical  
49  
50 Education. 2017; 51(11):1118-1126.  
51  
52  
53 28. Kopp V, Stark R, Kühne-Eversmann L, Fischer MR. Do worked examples foster  
54  
55 medical students' diagnostic knowledge of hyperthyroidism? Medical Education.  
56  
57 2009;43(12):1210-7.  
58  
59  
60

- 1  
2  
3  
4 29. Schmidmaier R, Eiber S, Ebersbach R, Schiller M, Hege I, Holzer M, et al.  
5  
6 Learning the facts in medical school is not enough: Which factors predict successful  
7  
8 application of procedural knowledge in a laboratory setting? *BMC Medical Education*.  
9  
10 2013;13:28.  
11  
12  
13 30. Hausknecht JP, Halbert JA, Di Paolo NT, Moriarty Gerrard MO. Retesting  
14  
15 in selection: A meta-analysis of coaching and practice effects for tests of cognitive  
16  
17 ability. *Journal of Applied Psychology*. 2007;92(2):373–385.  
18  
19  
20 31. Hautz WE, Kämmer JE, Schauber SK, Spies CD, Gaissmaier W. Diagnostic  
21  
22 performance by medical students working individually or in teams. *JAMA*.  
23  
24 2015;313(3):303-4.  
25  
26  
27 32. Schmidt HG, Mamede S. How to improve the teaching of clinical reasoning: a  
28  
29 narrative review and a proposal. *Medical Education*. 2015;49(10):961-73.  
30  
31  
32 33. Lou Y, Abrami PC, d'Apollonia S. Small group and individual learning with  
33  
34 technology: A meta-analysis. *Review of Educational Research*. 2001;71(3):449-521.  
35  
36  
37 34. Springer L, Stanne ME, Donovan SS. Effects of small-group learning on  
38  
39 undergraduates in science, mathematics, engineering, and technology: A meta-analysis.  
40  
41 *Review of Educational Research*. 1999;69(1):21-51.  
42  
43  
44 35. Heitzmann N, Fischer MR, Fischer F. Towards more systematic and better  
45  
46 theorised research on simulations. *Medical Education*. 2017;51(2):129-131.  
47  
48  
49 36. Fischer F, Chinn C, Engelmann K, Osborne J, editors. *Scientific reasoning and  
50  
51 argumentation. The roles of general and specific knowledge*. New York, NY:  
52  
53 Routledge; 2018.  
54  
55  
56  
57  
58  
59  
60

1  
2  
3  
4 37. Keemink Y, Custers E, van Dijk S, ten Cate O. Illness script development in pre-  
5 clinical education through case-based clinical reasoning training. International Journal  
6 of Medical Education. 2018;9:35-41.  
7  
8  
9  
10  
11  
12  
13  
14  
15  
16  
17  
18  
19  
20  
21  
22  
23  
24  
25  
26  
27  
28  
29  
30  
31  
32  
33  
34  
35  
36  
37  
38  
39  
40  
41  
42  
43  
44  
45  
46  
47  
48  
49  
50  
51  
52  
53  
54  
55  
56  
57  
58  
59  
60

For peer review only



## Figure legends

*Figure 1: Study design.* Full data sets of 90 medical students were analysed. T\_0: knowledge application pre-test, T\_1: knowledge application post-test, T\_2: delayed knowledge application post-test.

*Figure 2: Live-CCD Structure.* CCD sessions are divided into three parts: In the *admission* part the presenting student shows the discussants his prepared slides (based on the original NEJM-case record), after which the group has to agree on an assessment of the patient under discussion. In the interactive *discussion* part the students prioritise the medical problems, link them to possible etiologies and order tests to further corroborate or discard differential diagnoses. After all the tests that were performed in the case record, the discussants order the putative diagnostic test. The result is disclosed along with the pathological discussion and “take home messages” on important differentials in the third part of the session. Abbreviations: CC chief complaint, HPI history of present illness, PMH past medical history, Meds medications, SH social history, FH family history, ROS review of systems, VS vital signs, PE physical examination, CMP comprehensive metabolic panel, CBC complete blood count, PT prothrombin time, PTT partial thromboplastin time, UA urine analysis, ECG electrocardiogram, CXR chest radiograph.

*Figure 3: Knowledge application test.* Exemplary items are shown for each of the knowledge types addressed (arrows point to the correct answers). The test included 11 items on conceptual knowledge, 9 items on strategic knowledge, and 9 items on conditional knowledge.



Figure 1: Study design. Full data sets of 90 medical students were analysed. T\_0: knowledge application pre-test, T\_1: knowledge application post-test, T\_2: delayed knowledge application post-test.



Figure 2: Live-CCD Structure. CCD sessions are divided into three parts: In the admission part the presenting student shows the discussants his prepared slides (based on the original NEJM-case record), after which the group has to agree on an assessment of the patient under discussion. In the interactive discussion part the students prioritise the medical problems, link them to possible etiologies and order tests to further corroborate or discard differential diagnoses. After all the tests that were performed in the case record, the discussants order the putative diagnostic test. The result is disclosed along with the pathological discussion and "take home messages" on important differentials in the third part of the session. Abbreviations: CC chief complaint, HPI history of present illness, PMH past medical history, Meds medications, SH social history, FH family history, ROS review of systems, VS vital signs, PE physical examination, CMP comprehensive metabolic panel, CBC complete blood count, PT prothrombin time, PTT partial thromboplastin time, UA urine analysis, ECG electrocardiogram, CXR chest radiograph.

### Conceptual knowledge

- What of the following medications is a neuraminidase inhibitor?  
Amantadin / Ledipasvir / Tenofovir / Dolutegravir / ➡ **Zanamivir**

### Strategic knowledge

A 54 year old woman is brought into your emergency department by EMS with cough, fever and dyspnea. History taking is almost impossible because the patient is somnolent. Her vital signs are: T 39,2 °C, BP 120/80 mmHG, HF 90 bpm, AF 30/min, SpO<sub>2</sub> 83% on ambient air, raising to 87% with 15l O<sub>2</sub>/min on a non-rebreather mask. PE: diffuse crackles over both lungs, peripheral cyanosis.

- What is the most pressing diagnostic or therapeutic measure?  
➡ **Intubation**

### Conditional knowledge

A 42 year old woman presents with a body weight of 35 kg and a BMI of 19,2. The patient tells you while weight loss was intentional in the beginning, it has now by far exceeded the desired extent. Lab values show macrocytic anemia and thrombocytopenia along with an eosinophilia of 800/μl. You suspect an infection with the fish tape worm *Diphyllobothrium latum*.

- Please elaborate what processes might underly the weight loss and the bicytopenia.  
➡ **Tape worm infection causes vitamin B12 deficiency-induced bicytopenia and malnutrition because of biological competition for enteral resorption of vitamins and nutrients**

Figure 3: Knowledge application test. Exemplary items are shown for each of the knowledge types addressed (arrows point to the correct answers). The test included 11 items on conceptual knowledge, 9 items on strategic knowledge, and 9 items on conditional knowledge.

150x135mm (600 x 600 DPI)

## Supplemental

*Baseline data: Demographic characteristics of the study participants.*

|                           | CCD format    |         |               |         |               |         |               |         |
|---------------------------|---------------|---------|---------------|---------|---------------|---------|---------------|---------|
|                           | Live-CCD      |         | Video-CCD     |         | Paper-Cases   |         | All formats   |         |
|                           | <i>n</i> = 30 |         | <i>n</i> = 27 |         | <i>n</i> = 33 |         | <i>N</i> = 90 |         |
| Gender distribution       |               |         |               |         |               |         |               |         |
| <i>N</i> m/f              | 14/16         |         | 5/22          |         | 12/21         |         | 31/59         |         |
| (% f)                     | (53.3% f)     |         | (81.5% f)     |         | (63.6% f)     |         | (65.6% f)     |         |
|                           | M             | (SD)    | M             | (SD)    | M             | (SD)    | M             | (SD)    |
| Age                       | 23.77         | (4.09)  | 22.26         | (1.77)  | 22.91         | (2.40)  | 23.0          | (2.97)  |
| Clinical semester         | 3.23          | (1.96)  | 3.41          | (1.47)  | 3.82          | (1.84)  | 3.50          | (1.78)  |
| High school grade         | 1.53          | (0.36)  | 1.35          | (0.42)  | 1.48          | (0.68)  | 1.46          | (0.52)  |
| First National Board Exam |               |         |               |         |               |         |               |         |
| Score                     | 245           | (30)    | 226           | (78)    | 246           | (30)    | 240           | (49)    |
| Participants with prior   |               |         |               |         |               |         |               |         |
| CCD experience            | 6             | (20.0%) | 6             | (22.2%) | 5             | (15.1%) | 17            | (18.9%) |
| <i>n</i> (%)              |               |         |               |         |               |         |               |         |

1  
2  
3 *Questionnaire items (5-point Likert scale) for the assessment of subjective learning outcomes.*  
4  
5

- 6 1. I perceived this CCD format as meaningful.
  - 7 2. I learned a lot during the CCD course.
  - 8 3. The CCD course increased my learning motivation.
  - 9 4. I would like to participate in this CCD format again in the future.
  - 10 5. I enjoyed the CCD course.
  - 11 6. This CCD format should be offered as part of the curriculum.
  - 12 7. I was able to follow the case discussions.
  - 13 8. Learning in the CCD format is easier for me than learning in traditional lectures or seminars.
  - 14 9. How would you rate the course overall?
- 15  
16  
17  
18  
19  
20  
21  
22  
23  
24  
25  
26  
27  
28  
29  
30  
31  
32  
33  
34  
35  
36  
37  
38  
39  
40  
41  
42  
43  
44  
45  
46



### CONSORT 2010 Flow Diagram

1  
2  
3  
4  
5  
6  
7  
8  
9  
10  
11  
12  
13  
14  
15  
16  
17  
18  
19  
20  
21  
22  
23  
24  
25  
26  
27  
28  
29  
30  
31  
32  
33  
34  
35  
36  
37  
38  
39  
40  
41  
42  
43  
44  
45  
46  
47

**Enrollment**

Assessed for eligibility (n=106)

Excluded (n=0)  
 ♦ Not meeting inclusion criteria (n=0)  
 ♦ Declined to participate (n=0)  
 ♦ Other reasons (n=0)

Randomised (n=106)

**Allocation**

Allocated to Live-CCD (n=35)  
 ♦ Received allocated intervention (n=35)  
 ♦ Did not receive allocated intervention (n=0)

Allocated to Video-CCD (n=34)  
 ♦ Received allocated intervention (n=34)  
 ♦ Did not receive allocated intervention (n=0)

Allocated to Paper-Cases (n=37)  
 ♦ Received allocated intervention (n=37)  
 ♦ Did not receive allocated intervention (n=0)

**Follow-Up**

Lost to follow-up/discontinued intervention (reasons not known) (n=5)

Lost to follow-up/discontinued intervention (reasons not known) (n=7)

Lost to follow-up/discontinued intervention (reasons not known) (n=4)

**Analysis**

Analysed (n=30)  
 ♦ Excluded from analysis because of incomplete datasets (n=5)

Analysed (n=27)  
 ♦ Excluded from analysis because of incomplete datasets (n=7)

Analysed (n=33)  
 ♦ Excluded from analysis because of incomplete datasets (n=4)

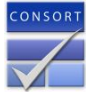

## CONSORT 2010 checklist of information to include when reporting a randomised trial\*

| Section/Topic                    | Item No | Checklist item                                                                                                                                                                              | Reported on page No |
|----------------------------------|---------|---------------------------------------------------------------------------------------------------------------------------------------------------------------------------------------------|---------------------|
| <b>Title and abstract</b>        |         |                                                                                                                                                                                             |                     |
|                                  | 1a      | Identification as a randomised trial in the title                                                                                                                                           | 1                   |
|                                  | 1b      | Structured summary of trial design, methods, results, and conclusions (for specific guidance see CONSORT for abstracts)                                                                     | 2-3                 |
| <b>Introduction</b>              |         |                                                                                                                                                                                             |                     |
| Background and objectives        | 2a      | Scientific background and explanation of rationale                                                                                                                                          | 4-7                 |
|                                  | 2b      | Specific objectives or hypotheses                                                                                                                                                           | 6-7                 |
| <b>Methods</b>                   |         |                                                                                                                                                                                             |                     |
| Trial design                     | 3a      | Description of trial design (such as parallel, factorial) including allocation ratio                                                                                                        | 8                   |
|                                  | 3b      | Important changes to methods after trial commencement (such as eligibility criteria), with reasons                                                                                          | not applicable      |
| Participants                     | 4a      | Eligibility criteria for participants                                                                                                                                                       | 7                   |
|                                  | 4b      | Settings and locations where the data were collected                                                                                                                                        | 7                   |
| Interventions                    | 5       | The interventions for each group with sufficient details to allow replication, including how and when they were actually administered                                                       | 8-10                |
| Outcomes                         | 6a      | Completely defined pre-specified primary and secondary outcome measures, including how and when they were assessed                                                                          | 8, 11-12            |
|                                  | 6b      | Any changes to trial outcomes after the trial commenced, with reasons                                                                                                                       | not applicable      |
| Sample size                      | 7a      | How sample size was determined                                                                                                                                                              | 12                  |
|                                  | 7b      | When applicable, explanation of any interim analyses and stopping guidelines                                                                                                                | not applicable      |
| <b>Randomisation:</b>            |         |                                                                                                                                                                                             |                     |
| Sequence generation              | 8a      | Method used to generate the random allocation sequence                                                                                                                                      | 7                   |
|                                  | 8b      | Type of randomisation; details of any restriction (such as blocking and block size)                                                                                                         | 7                   |
| Allocation concealment mechanism | 9       | Mechanism used to implement the random allocation sequence (such as sequentially numbered containers), describing any steps taken to conceal the sequence until interventions were assigned | not applicable      |
| Implementation                   | 10      | Who generated the random allocation sequence, who enrolled participants, and who assigned participants to interventions                                                                     | not applicable      |
| Blinding                         | 11a     | If done, who was blinded after assignment to interventions (for example, participants, care providers, those                                                                                | not applicable      |



|    |                          |                                                             |                                                                                                                  |
|----|--------------------------|-------------------------------------------------------------|------------------------------------------------------------------------------------------------------------------|
| 1  |                          | assessing outcomes) and how                                 |                                                                                                                  |
| 2  | 11b                      | If relevant, description of the similarity of interventions | not applicable                                                                                                   |
| 3  | Statistical methods      | 12a                                                         | Statistical methods used to compare groups for primary and secondary outcomes                                    |
| 4  |                          | 12b                                                         | Methods for additional analyses, such as subgroup analyses and adjusted analyses                                 |
| 5  |                          |                                                             |                                                                                                                  |
| 6  | <b>Results</b>           |                                                             |                                                                                                                  |
| 7  | Participant flow (a      | 13a                                                         | For each group, the numbers of participants who were randomly assigned, received intended treatment, and         |
| 8  | diagram is strongly      |                                                             | were analysed for the primary outcome                                                                            |
| 9  | recommended)             | 13b                                                         | For each group, losses and exclusions after randomisation, together with reasons                                 |
| 10 |                          |                                                             |                                                                                                                  |
| 11 | Recruitment              | 14a                                                         | Dates defining the periods of recruitment and follow-up                                                          |
| 12 |                          | 14b                                                         | Why the trial ended or was stopped                                                                               |
| 13 | Baseline data            | 15                                                          | A table showing baseline demographic and clinical characteristics for each group                                 |
| 14 |                          |                                                             |                                                                                                                  |
| 15 |                          |                                                             |                                                                                                                  |
| 16 | Numbers analysed         | 16                                                          | For each group, number of participants (denominator) included in each analysis and whether the analysis was      |
| 17 |                          |                                                             | by original assigned groups                                                                                      |
| 18 | Outcomes and             | 17a                                                         | For each primary and secondary outcome, results for each group, and the estimated effect size and its            |
| 19 | estimation               |                                                             | precision (such as 95% confidence interval)                                                                      |
| 20 |                          | 17b                                                         | For binary outcomes, presentation of both absolute and relative effect sizes is recommended                      |
| 21 |                          |                                                             |                                                                                                                  |
| 22 | Ancillary analyses       | 18                                                          | Results of any other analyses performed, including subgroup analyses and adjusted analyses, distinguishing       |
| 23 |                          |                                                             | pre-specified from exploratory                                                                                   |
| 24 |                          |                                                             |                                                                                                                  |
| 25 | Harms                    | 19                                                          | All important harms or unintended effects in each group (for specific guidance see CONSORT for harms)            |
| 26 |                          |                                                             |                                                                                                                  |
| 27 | <b>Discussion</b>        |                                                             |                                                                                                                  |
| 28 | Limitations              | 20                                                          | Trial limitations, addressing sources of potential bias, imprecision, and, if relevant, multiplicity of analyses |
| 29 | Generalisability         | 21                                                          | Generalisability (external validity, applicability) of the trial findings                                        |
| 30 | Interpretation           | 22                                                          | Interpretation consistent with results, balancing benefits and harms, and considering other relevant evidence    |
| 31 |                          |                                                             |                                                                                                                  |
| 32 | <b>Other information</b> |                                                             |                                                                                                                  |
| 33 | Registration             | 23                                                          | Registration number and name of trial registry                                                                   |
| 34 | Protocol                 | 24                                                          | Where the full trial protocol can be accessed, if available                                                      |
| 35 | Funding                  | 25                                                          | Sources of funding and other support (such as supply of drugs), role of funders                                  |
| 36 |                          |                                                             |                                                                                                                  |

37  
38  
39 \*We strongly recommend reading this statement in conjunction with the CONSORT 2010 Explanation and Elaboration for important clarifications on all the items. If relevant, we also  
40 recommend reading CONSORT extensions for cluster randomised trials, non-inferiority and equivalence trials, non-pharmacological treatments, herbal interventions, and pragmatic trials.  
41 Additional extensions are forthcoming: for those and for up to date references relevant to this checklist, see [www.consort-statement.org](http://www.consort-statement.org).
