# Supplementary material for: Can clinical case discussions foster clinical reasoning skills in undergraduate medical education? A randomised controlled trial
Source: PubMed Central journal article supplement — BMJ Open. 2019 Sep 6;9(9):e025973. doi: 10.1136/bmjopen-2018-025973 (PMC6731854; doi:10.1136/bmjopen-2018-025973), 2019-09-06
Supplement: bmjopen-2018-025973supp001.pdf [file bmjopen-2018-025973supp001.pdf]

## Supplemental

*Baseline data: Demographic characteristics of the study participants.*

|                                        | CCD format    |         |               |         |               |         |               |         |
|----------------------------------------|---------------|---------|---------------|---------|---------------|---------|---------------|---------|
|                                        | Live-CCD      |         | Video-CCD     |         | Paper-Cases   |         | All formats   |         |
|                                        | <i>n</i> = 30 |         | <i>n</i> = 27 |         | <i>n</i> = 33 |         | <i>N</i> = 90 |         |
| Gender distribution                    | 14/16         |         | 5/22          |         | 12/21         |         | 31/59         |         |
| <i>N</i> m/f                           |               |         |               |         |               |         |               |         |
| (% f)                                  | (53.3% f)     |         | (81.5% f)     |         | (63.6% f)     |         | (65.6% f)     |         |
|                                        | M             | (SD)    | M             | (SD)    | M             | (SD)    | M             | (SD)    |
| Age                                    | 23.77         | (4.09)  | 22.26         | (1.77)  | 22.91         | (2.40)  | 23.0          | (2.97)  |
| Clinical semester                      | 3.23          | (1.96)  | 3.41          | (1.47)  | 3.82          | (1.84)  | 3.50          | (1.78)  |
| High school grade                      | 1.53          | (0.36)  | 1.35          | (0.42)  | 1.48          | (0.68)  | 1.46          | (0.52)  |
| First National Board Exam Score        | 245           | (30)    | 226           | (78)    | 246           | (30)    | 240           | (49)    |
| Participants with prior CCD experience | 6             | (20.0%) | 6             | (22.2%) | 5             | (15.1%) | 17            | (18.9%) |
| <i>n</i> (%)                           |               |         |               |         |               |         |               |         |

*Questionnaire items (5-point Likert scale) for the assessment of subjective learning outcomes.*

1. I perceived this CCD format as meaningful.
2. I learned a lot during the CCD course.
3. The CCD course increased my learning motivation.
4. I would like to participate in this CCD format again in the future.
5. I enjoyed the CCD course.
6. This CCD format should be offered as part of the curriculum.
7. I was able to follow the case discussions.
8. Learning in the CCD format is easier for me than learning in traditional lectures or seminars.
9. How would you rate the course overall?
